# Supplementary material for: Beyond One-Size-Fits-All: Cancer Biology Shapes Nanoparticle Behavior
Source: Research Square preprint supplement (doi:10.21203/rs.3.rs-7865764/v1), 2025-11-03
Supplement: Supplementary file 1 [file 031335340ed128fb20d77df6.xlsx]

## Sheet: Sheet1
Gene	Protein	A549_R1	A549_R2	A549_R3	A549_R4	Hela_R1	Hela_R2	Hela_R3	Hela_R4	KM12C_R1	KM12C_R2	KM12C_R3	KM12C_R4	MCF7_R1	MCF7_R2	MCF7_R3	MCF7_R4	Ratio A549	Ratio HeLa	Ratio KM12C
AGRN	O00468	924.78	593.215	788.266	831.05	1300.28	1195.82	953.178	948.554	435.109	471.246	372.969	542.84	540.841	440.807	398.544	721.502	1.49275	2.09252	0.866998
PLOD2	O00469	3663.75	3956.18	3501.18	2803.69	4966.43	4530.94	2335.1	3203.23	1504.35	1249.38	371.525	1746.27	3400.44	2519.17	2574.88	3165.94	1.19419	1.28947	0.417783
CASK	O14936	1861.18	1644.26	1852.04	1789.87	771.499	963.019	919.539	968.976	1160.86	1096.83	1197.44	1138.21	1156.14	1165.5	1288.99	1259.86	1.46748	0.743876	0.943096
LAMA5	O15230	452.305	413.734	436.823	409.969	391.74	352.706	416.314	396.394	325.941	358.747	293.968	330.716	210.068	202.66	167.084	209.21	2.17083	1.97352	1.65949
PLOD3	O60568	2649.97	1736.77	1748.18	1815.68	4303.15	3992.22	4350.81	4477.04	2157.94	2071.68	2130.58	2361.48	2649.16	2301.32	2287.85	2443.47	0.82119	1.7686	0.900833
PLG	P00747	95.6991	459.408	574.485	479.037	1536.92	1689.45	1913.87	2818.49	708.617	97.0203	433.787	885.809	272.212	331.248	287.216	116.426	1.59729	7.90261	2.11025
SERPINC1	P01008	479.065	698.005	453.099	837.556	174.39	153.897	136.42	220.974	1984.4	2543.17	1596.69	2018.65	562.684	173.592	162.991	61.6545	2.56808	0.713566	8.47406
SERPINA3	P01011	213.361	742.939	202.154	119.663	104.152	271.99	78.5998	432.061	51.7431	41.0606	63.3546	86.5035	708.897	409.103	382.582	542.175	0.625682	0.43412	0.118791
A2M	P01023	1363.84	931.738	1433.24	824.786	1862.36	2125.63	2079.24	2616	875.013	1001.85	959.515	683.725	809.028	997.759	680.666	944.687	1.32675	2.52997	1.02563
TIMP1	P01033	489.317	525.837	929.287	559.147	714.617	872.448	962.419	1089.47	1064.95	770.244	951.01	1291.08	478.446	72.9387	206.864	496.71	1.99496	2.89966	3.24894
TGFB1	P01137	1907.68	729.578	512.918	396.386	686.186	460.872	124.417	359.569	965.067	1226.07	1109.77	1456.76	514.334	341.835	298.652	521.104	2.11618	0.973221	2.83883
APOA1	P02647	20597.3	20822.5	22800.3	13990.8	23143.6	26188.1	91.1141	88.0486	18483.7	87.8789	18372	17533.7	46658.5	25724.2	185.662	26934.3	0.786018	0.497584	0.547495
FGA	P02671	849.181	1815.56	2466.28	2164.59	893.701	964.868	768.597	797.953	387.368	403.599	839.248	1546.88	1388.34	67.0387	101.624	202.749	4.14582	1.94636	1.80542
APOH	P02749	2958.73	996.357	1306.04	1041.58	618.885	718.143	1179.92	127.948	75.0455	428.368	1299.6	772.329	355.197	852.818	580.146	786.318	2.44815	1.02735	1.00033
FN1	P02751	2451.01	1872.92	2409.65	1994.05	683.537	766.964	792.208	513.065	399.348	266.318	212.307	329.096	415.169	276.366	257.322	385.536	6.54053	2.06519	0.904584
AHSG	P02765	7042.91	7900.37	14209.4	6572.54	9473.22	12706.5	21010.9	9675.9	4995.56	6662.11	4679.03	3225.92	1879.53	5421.39	7705.42	4706.47	1.81228	2.68184	0.992381
VTN	P04004	1094.17	914.944	874.348	1053.51	5318.75	6430.35	4452.92	3859.58	824.973	292.265	460.208	993.368	458.866	298.35	451.04	192.633	2.81034	14.3206	1.83513
CSTB	P04080	1064.14	1718.18	2577.53	2140.71	2365.4	1739.6	1366.26	880.079	2320.9	2506.31	2812.93	3639.49	1442.08	1427.61	1573.99	1296.78	1.30661	1.10642	1.96494
ANXA1	P04083	108515	91059.7	90103.4	84552.9	16991.3	17391.8	22220.4	23138.3	3814.36	3541.95	4444.46	4166.68	1252.08	114.005	137.482	196.777	220.091	46.8973	9.39069
S100A8	P05109	679.274	1233.04	1556.82	542.123	971.06	1266.88	1919.56	1419.88	643.847	902.253	2138.38	5790.95	5767.19	1030.74	687.068	2277.87	0.410868	0.571284	0.970558
S100A9	P06702	939.678	1880.33	2435.91	848.355	1334.89	1403.44	3030.81	2142.25	912.126	1542.81	3230.41	7433.36	9736.63	1699.84	985.15	3582.55	0.381418	0.494333	0.819706
S100A6	P06703	19106.6	35376.2	24341.6	21126.8	26210.5	39857.5	6644.12	9808.06	49175.1	58506.1	27754	50769.2	854.231	73.4432	1313.79	156.115	41.6883	34.4181	77.6635
CTSD	P07339	92766.3	67127.4	75718.5	66871.3	16322.9	20055.1	23462.6	18357.6	31067.7	29066.9	43427.8	35428.4	38043	33426.8	31754.7	41369.3	2.09195	0.540813	0.96125
ANXA2	P07355	254130	224379	238964	218342	95849.9	98151.3	102587	112780	67611.6	57184.6	63123.3	73541.6	27356.2	23912.2	27310.8	27232.3	8.84418	3.86884	2.47101
PSAP	P07602	4244.3	3394.97	3832.24	3821.56	3059.63	2646.73	2398.63	4357.02	3416.93	3119.27	3591.09	3764.28	1676.42	1439.8	1924.58	1646.45	2.2869	1.86355	2.07732
CTSL	P07711	3233.32	4008.91	3663.93	3561.31	1195.2	1415.92	1510.46	1247.17	358.075	131.293	408.38	117.29	1122.05	977.858	1046.44	1195.82	3.33185	1.23642	0.233763
CTSB	P07858	5341.11	4951.97	5079.92	4862.42	1521.1	1365.5	1308.61	1050.32	4000.16	4167.2	5489.43	3546.41	1588	1834.36	2581.25	1669.5	2.63718	0.683623	2.24201
HSP90AA1	P07900	35421.7	38792.2	46965.9	41125.8	33869.7	34190.9	40800.8	35200.5	67780.6	66494.7	64225.6	71292.6	66448.7	60621.5	61811.1	64664.1	0.640144	0.56819	1.06408
LAMB1	P07942	825.062	850.354	971.299	877.388	992.545	933.663	949.921	1093.1	991.937	1092.01	1021.47	1086.69	151.828	72.6807	73.1673	95.0594	8.97324	10.1066	10.6741	**
THBS1	P07996	131.244	441.544	420.348	394.668	523.654	552.568	750.498	714.776	155.522	231.581	123.425	153.096	828.101	1021.96	721.649	976.141	0.391168	0.716348	0.187049
COL1A2	P08123	545.483	88.7452	431.797	912.493	119.882	74.9519	963.354	707.483	667.94	887.427	80.4031	844.047	697.882	99.3531	391.297	1121.98	0.856309	0.807469	1.07327
ANXA6	P08133	3591.24	3808.48	4134.36	4239.72	9094.43	9827.41	7657.08	7941.88	627.709	604.352	528.992	690.057	13655.1	13315.9	12027.1	11661.2	0.31137	0.68143	0.0483842
ANXA5	P08758	58910.5	50015	57926.5	50884.4	44196.2	43803.6	43399.3	54371.4	19176.6	14395.6	17471.8	19700.2	29931.7	30677.3	28647.7	35375	1.74704	1.49056	0.567626
LGALS1	P09382	1552.58	1293	1375.56	1126.01	6491.19	4344.5	4208.26	1624.9	112.026	514.335	89.0819	70.361	257.823	319.084	342.697	437.679	3.9396	12.281	0.578954
ANXA4	P09525	119498	110907	103979	100206	2375.65	2570.01	2374.82	2859.93	3335.27	2672.02	3107.28	3193.96	6094.35	5560.52	6444.57	5706.45	18.2556	0.427643	0.517038
CTSH	P09668	542.48	262.573	80.574	477.393	70.0566	605.701	505.467	403.176	240.729	424.168	358.028	315.368	682.048	654.375	837.902	745.651	0.466792	0.542607	0.458323
CLU	P10909	5444	3460.72	3295.45	3321.85	12401.8	13533.6	7949.6	11689.6	235.519	224.245	374.16	356.859	4440.99	3732.75	3765.33	3781.59	0.987364	2.89903	0.0757464
LAMC1	P11047	124.996	366.117	423.328	460.286	654.703	672.63	785.488	732.71	994.769	1104.64	1056.09	1036.11	354.842	266.21	415.363	292.049	1.03482	2.14197	3.15524
COL6A1	P12109	112.854	169.535	66.3699	82.2035	148.171	243.428	470.293	119.51	488.809	606.979	570.342	540.71	106.131	127.214	140.437	134.264	0.848275	1.93172	4.34378
VCAN	P13611	3493.81	2439.9	2641.42	2755.48	378.287	194.773	74.3737	123.403	186.038	634.815	114.063	589.131	417.824	72.0991	87.7783	89.9435	16.971	1.15456	2.28272
PKM	P14618	205665	187636	195012	174235	181540	172918	194261	187447	258546	241103	290929	279664	123009	105780	113200	117078	1.66108	1.60361	2.33134
HSP90B1	P14625	68040	64215.6	70439	64996.9	40968.6	41320.7	42217.9	45030.9	58898.4	53265.8	56963.1	62348.9	44022.8	37879.2	37649.2	40304.5	1.67458	1.06057	1.44803
MMP9	P14780	3080.77	3517.93	1003.42	1878.25	4766.13	138.214	2877.19	3734.04	2109.1	2947.4	77.7853	2236.97	5406.82	4710.91	6684.8	2821.35	0.483103	0.586814	0.375627
ITGB4	P16144	1924.84	1671.41	1745.78	1551.26	1008.26	1033.66	882.743	1349.21	3458.72	2943.98	3241.92	3351.69	501.53	415.434	466.943	406.733	3.84961	2.38679	7.2579
LGALS3	P17931	572.317	239.386	319.761	276.598	711.548	618.063	402.829	506.692	364.989	290.178	473.439	346.717	463.198	281.337	751.693	458.637	0.720285	1.14541	0.754693
CDH2	P19022	398.091	177.351	168.645	214.567	627.154	1032.44	989.139	940.239	166.871	54.4422	86.7609	327.405	314.191	187.819	269.776	76.723	1.12981	4.22974	0.748936
ITIH2	P19823	1248.06	1269.73	2015.26	1203.71	1778.96	2523.91	2574.15	2164.81	737.412	981.419	926.24	770.063	1219.44	1459.37	848.901	1113.21	1.23613	1.94828	0.735875
ANXA7	P20073	11633.6	9270.57	9059.19	9380.8	5998.58	6412.79	5779.37	6202.05	6574.25	6308.05	6758.79	6844.62	7997.35	7812.59	9036.44	8116.86	1.19358	0.74	0.803493
FLG	P20930	759.725	876.559	1082.04	540.357	1073.65	1418.11	2139.54	1491.18	427.3	855.857	692.203	828.294	1138.18	925.921	643.573	904.472	0.902145	1.69497	0.776174
TGM2	P21980	29895.5	26559.9	26149.7	26827	1573.58	1836.6	1663.2	1881.96	263.558	529.054	2016.82	252.923	1397.05	75.3708	356.618	217.599	53.4691	3.39842	1.49629
FBLN1	P23142	1332.57	929.762	1015.08	838.156	615.701	876.526	815.638	810.03	147.898	201.155	62.2296	78.3611	346.577	298.616	328.112	277.435	3.2905	2.49284	0.391483
AZGP1	P25311	673.154	1716.97	1501.06	620.92	1254.1	1862.78	1986.92	1986.27	611.434	978.663	1003.08	1160.26	728.381	1019.87	552.927	1331.24	1.24218	1.95189	1.03332
S100A4	P26447	63379.5	47118	45143.2	45665.8	36212.8	48118.3	18356.5	24660.8	715.444	1298.64	1069.06	918.963	196.526	485.457	256.492	244.68	170.144	107.635	3.38257
CALR	P27797	24411.6	25252.2	29837.6	25118	39121.4	42155.3	38445.2	44535.9	26161.5	22176.8	23566.6	24869.1	24230.2	23863.8	21282.2	22626	1.13714	1.78537	1.05186
SERPINB1	P30740	8982.09	9904.92	10079.3	8147.17	3066.41	3205.82	2831.21	3630.81	5060.43	3951.17	3674.94	4704.54	3230.46	3598.63	3762.33	3857.31	2.56863	0.88134	1.20364
S100A7	P31151	349.763	868.976	986.319	247.731	485.843	956.994	1557.08	964.598	322.206	490.275	1234.79	910.939	1048.7	597.325	340.537	1015.82	0.816946	1.32045	0.985287
L1CAM	P32004	99.3061	253.37	89.7396	135.762	2547.73	1961.97	2962.65	2415.72	79.7212	100.519	46.6053	129.738	285.119	235.275	408.215	266.559	0.483763	8.27337	0.298355
GPC1	P35052	1203.9	826.019	995.573	822.642	1150.31	1164.8	1110.7	980.681	366.867	471.442	412.615	356.918	420.619	316.334	368.831	417.801	2.52571	2.89219	1.0553
SERPINB6	P35237	2431.87	2356.34	1880.37	1822.88	2748.51	2896.44	2813.14	3165.66	1437.55	1325.54	1024.74	1132.26	3159.61	3491.34	3792.58	3555.63	0.606569	0.830318	0.351457
THBS2	P35442	54.8449	612.485	241.91	86.8724	266.109	117.286	70.2737	351.083	1977.1	2026.4	2215.18	2451.85	222.409	177.676	141.984	261.235	1.24002	1.0018	10.7936
CD151	P48509	6853.28	7803.31	8181.83	7044.46	4135.18	3734.86	2550.68	4681.59	2027.98	2471.84	1556.75	2257.04	1803.77	1863.75	3809.47	2407.97	3.02306	1.52781	0.841035
LMAN1	P49257	4126.25	4891.38	3642.14	4318.24	5335.83	4675.22	4790.09	5345.34	2371.74	2156	2019.22	2151.16	2542.77	2277.72	2418.04	2127.4	1.81274	2.15104	0.928698
SERPINB8	P50452	1945.1	2390.66	2349.83	2021.68	1180.61	1609.08	1035.37	2259.67	1324.99	914.981	1136.94	1026.79	1320.4	1222.6	1399.28	1489.89	1.60291	1.12013	0.810673
SERPINB9	P50453	2521.18	2695.38	2428.34	2278.39	864.894	1109.33	1153.61	956.823	234.805	89.6019	116.68	98.2839	357.321	384.807	402.773	430.214	6.30004	2.59324	0.342433
SERPINH1	P50454	3392.21	5008	6301.94	5524.84	10281.1	10634.6	12642.7	11606.1	6548.77	5634.71	5635.94	6163.7	5892.68	5214.89	4787.98	5946.06	0.926076	2.06782	1.09805
BCAM	P50895	1899.8	1055.03	1065.63	1316.12	970.078	1051.98	1569.1	1333.17	78.7106	157.981	219.734	59.7454	2737.5	3442.53	3978.77	3084.67	0.402959	0.371831	0.0389756
ANXA11	P50995	8706.93	7644.85	8977.38	8374.77	5551.13	5661.03	4990.47	5219.78	8596.02	8783.85	9024.2	9582.97	4403.64	4737.64	5069.17	4618.72	1.78999	1.13773	1.91124
HDGF	P51858	16349.2	14124.9	18482.6	15227.4	14714.1	16315.8	21501.9	17908.8	9674.15	9115.12	9018.45	10692.9	16628.5	17757.1	19079.7	19431.8	0.880474	0.9663	0.52815
HNRNPM	P52272	21070.8	15548.7	20296	16328.5	13615.9	14527.2	14236.7	12308.2	17954.8	19875.9	19347.1	20067.1	15699.3	15113	18300.9	16098.8	1.12317	0.838621	1.18452
EFNA5	P52803	634.012	472.791	368.593	430.613	275.181	273.966	197.251	93.2068	83.7757	97.4373	150.286	220.722	100.865	180.469	136.727	137.863	3.42855	1.51029	0.993341
CTSC	P53634	3847.4	3892.97	5460.12	5161.28	7856.67	9077.61	7946.17	4811.74	3490.85	2986.84	4077.49	3520.1	637.582	442.543	335.73	635.212	8.95231	14.4765	6.86242
MFAP1	P55081	392.504	413.578	496.503	438.724	837.929	770.429	863.67	934.965	957.122	894.344	921.643	901.848	697.133	619.625	659.204	581.593	0.680849	1.33213	1.4369
LAMB2	P55268	2699.88	1398.31	1511.5	1301.35	1509.99	1876.32	1083.63	1363.85	614.068	656.511	754.508	720.036	1207.04	1163.61	1249.21	1450.21	1.3631	1.15063	0.541437
LGALS4	P56470	989.795	1716.75	1322.13	860.346	131.116	72.9752	1986.72	66.3086	4039.55	1755.75	2315.45	3689.12	717.553	76.7591	67.4172	569.137	3.41683	1.57745	8.24666
S100A10	P60903	6261.87	16411.2	19435.4	18527.8	3976.47	3521.04	3258.46	3146.26	6071.84	4390.32	7670.71	5659.69	3072.46	3137.26	3245.96	3488.71	4.68437	1.074	1.83806
MUC5AC	P98088	2869.55	3361.43	3079.21	3229.37	370.802	531.214	615.363	212.109	757.964	446.305	413.107	771.535	252.292	356.185	514.91	344.363	8.54339	1.17833	1.6276
HSPG2	P98160	410.029	235.082	300.13	307.438	693.41	661.663	350.593	438.068	220.517	179.113	153.728	240.785	147.918	270.99	51.5229	241.274	1.76011	3.01211	1.11583
PLOD1	Q02809	1804.63	1025.99	1397.57	1169.8	6769.78	5928.64	5235.1	4788.12	2269.23	2274.44	2019.86	2383.96	1141.33	997.382	1087.67	1169.55	1.22795	5.1688	2.03541
DST	Q03001	431.75	407.218	438.244	414.307	528.328	502.315	608.773	605.02	263.598	254.364	222.372	247.578	306.236	316.003	331.055	377.763	1.27081	1.6862	0.742201
LGALS3BP	Q08380	1423.71	1206.24	1500.16	1305.46	4893.69	5021.59	4178.5	6475.92	12862.8	12818.8	15509.4	14210.5	569.415	412.589	240.49	319.036	3.52609	13.3437	35.9392
DLG1	Q12959	1513.02	1250.57	1548.08	1420.05	985.175	1288.19	1098.88	1056.93	1546.29	1711.02	1629.77	1620.19	1523.74	1468.97	1504.15	1734.12	0.919875	0.710832	1.04434
LAMB3	Q13751	113.009	93.1687	134.734	142.429	136.222	102.519	270.292	201.864	139.007	195.296	250.429	270.538	119.369	89.579	46.3868	148.764	1.19609	1.75922	2.11648
DAG1	Q14118	1166.53	611.654	846.512	706.076	1479.14	1272.74	1062.96	1472.83	1608.96	1489.97	1423.66	1554.55	668.001	890.82	843.807	852.243	1.02332	1.62454	1.86709
ITIH4	Q14624	119.337	349.058	355.874	241.459	298.146	407.888	580.646	396.937	110.053	218.91	160.198	207.463	164.536	206.87	91.6783	198.471	1.61094	2.54494	1.05301
TGFBI	Q15582	1314.66	625.369	584.131	756.494	2189.41	2029.07	1774.82	2253.7	303.521	260.616	441.734	374.38	122.63	299.466	102.281	108.557	5.18326	13.0298	2.18072
ECM1	Q16610	863.102	654.908	757.128	456.631	578.487	1044.89	603.226	989.823	300.145	325.964	441.57	452.699	186.38	588.574	496.163	318.522	1.71848	2.02337	0.95643
LAMA3	Q16787	59.5967	415.255	423.711	336.679	368.569	360.87	287.911	302.322	505.002	367.895	456.345	381.309	93.5064	137.941	234.872	151.154	2.00048	2.13721	2.77024	*
P3H1	Q32P28	859.241	886.559	961.11	980.445	3813.41	3512.36	3123.76	3444.03	867.896	797.34	751.266	901.004	473.864	495.822	403.759	469.221	2.0011	7.53993	1.80038
HSD17B12	Q53GQ0	3665.29	4004.25	4296.99	4205.05	1428.93	1498.61	1402.64	1410.74	8278.34	6597.14	6000.63	8192.75	1736.06	1597.99	1421.86	1804.8	2.46491	0.875046	4.43075
HRNR	Q86YZ3	11586.7	14479.9	21923	5360.73	25509.6	20265.8	24500.1	20688.6	4199.58	5693.35	9332.46	9112.53	5240.79	8153.27	8891.56	8433.9	1.73669	2.96112	0.922473
HTRA1	Q92743	2581.73	403.798	403.508	296.93	2079.73	1590.38	972.221	1139.76	163.434	200.262	127.32	428.29	156.095	241.099	197.206	541.81	3.24409	5.08892	0.809099
GLG1	Q92896	5216.43	4368.81	4148.46	4109.12	2737.18	2670.81	2058.17	2560.51	2072.06	2265.29	2056.54	2021.15	3831.25	4068.85	5169.08	3803.52	1.0575	0.594254	0.498737
SERPINB12	Q96P63	803.951	1737.14	3019.4	629.565	1830.93	2716.2	2282.19	2590.47	633.081	721.375	1827.18	1159.36	689.756	1100.12	996.194	1343.54	1.49895	2.28104	1.05119
ERBIN	Q96RT1	1184.83	845.547	995.641	949.269	716.922	747.865	637.411	871.468	785.878	865.632	843.765	839.354	727.481	747.702	905.866	814.493	1.24401	0.930567	1.04352
COL12A1	Q99715	62.7671	2258.37	1668.71	981.683	1803.1	2310.42	1924.61	2061.9	978.928	504.535	77.0882	1016.51	999.133	1184.75	670.69	243.656	1.60464	2.61441	0.831786
GDF15	Q99988	129.639	87.5341	59.2967	116.047	321.457	179.488	340.04	589.095	3417.4	2085.74	2144.21	2776.34	412.954	230.615	323.97	365.64	0.294422	1.07268	7.81866
SMOC1	Q9H4F8	1098.67	1011.92	1002.44	954.763	3234.57	2898.55	1453.54	2416.6	1662.7	2342.45	2088.11	1632.62	272.906	113.213	59.0201	62.1237	8.01912	19.7201	15.2305
MUC5B	Q9HC84	12197.3	8587.98	8592.57	7785.96	239.182	542.582	317.448	281.759	244.522	163.873	135.963	191.606	809.325	406.453	599.383	469.443	16.2671	0.604469	0.32214
TFIP11	Q9UBB9	543.715	326.704	376.564	405.491	478.062	497.296	561.157	445.462	546.762	468.564	445.96	516.389	496.41	379.195	359.293	509.109	0.947516	1.13645	1.13398
CTSZ	Q9UBR2	7760.85	6268.82	7064.34	5799.29	5213.02	5773.44	4527.21	4101.1	616.735	552.198	572.236	606.886	414.806	690.217	121.542	193.259	18.9413	13.8149	1.65377
DMBT1	Q9UGM3	2285.29	2473.99	131.945	2225.57	4317.35	5123.08	3414.34	4289.99	2073.35	129.762	2700.65	3044.22	3770.72	3808.52	2068.26	3600.83	0.537184	1.29411	0.599923
GPC6	Q9Y625	760.02	207.64	519.884	349.402	43.2147	108.728	165.824	105.943	258.756	449.92	324.528	351.083	160.484	113.993	84.1378	391.462	2.44901	0.56489	1.84553
