# Supplementary material for: Beyond One-Size-Fits-All: Cancer Biology Shapes Nanoparticle Behavior
Source: Research Square preprint supplement (doi:10.21203/rs.3.rs-7865764/v1), 2025-11-03
Supplement: Supplementary file 2 [file 2bfd95b940b07ed86a0bbba9.xlsx]

## Sheet: Hoja1
Endocytic Transport	Extracellular Matrix
Gene	Gene
SYT2	SSPOP
ATP6V0D2	COL21A1
VPS26B	BMPER
ADAM8	MMP11
SYT9	IL7
SYK	PTPRZ1
AP2S1	CBLN1
CLTCL1	SFRP1
KIF5B	GPLD1
ZYX	ZP2
RAB11B	LTBP4
WNT1	CTSC
IL7R	GPC2
RIN2	LAMB3
VAMP3	COL14A1
WNT7A	MMP21
PIK3C2B	INHBE
CLEC4E	COL4A4
MYO1E	ADIPOQ
HYAL2	LOXL3
GPR161	MMP16
RAB20	WNT7A
STX7	COL11A2
FMNL1	ANXA8
MARCO	DLG1
ATP6V0A2	SMOC2
PIK3C3	COL17A1
SH3KBP1	SERPINB9
HLA-DPA1	SERPINB8
ANG	vitronectin-pai-1_human
WNT5B	tenascin-c_human
ATP6V0A1	platelet-multimerin_human
CDC42	glycoprotein-ia_human
EHD4	multimerin2_human
TYRP1	multimerin1_human
HP	emilin1_human
PDIA3	OVGP1
TLR9	LRRC17
DVL2	FBN3
CDC42EP2	ANOS1
CFTR	SSC5D
VPS9D1	ERBIN
ANXA11	VTN
NOD1	ADAMTS2
SRGAP2	MARCO
HYOU1	ZAN
PLD4	SRGN
M6PR	LRRN2
APPL2	SEMA7A
CD36	CCN6
SH3GL2	CCN4
STAB2	SLPI
HLA-DRB1	MMP1
ACTG1	ANG
CEMIP	ANXA2
DNM1	WNT2B
HSPH1	WNT5B
RAB11FIP1	CLU
AMELX	PRSS1
NOSTRIN	PRSS2
SLC9A9	tgfb3_human-1
RIN3	tgfb2_human-1
RABEP1	tgfb1_human-1
AP2B1	MUC2
STXBP3	PLOD1
SNAP23	CMA1
MYO1C	MMP14
ATP6V0B	VCAN
SMO	NCAN
CTLA4	NCAM1
UBC	COL7A1
UBB	GPC4
FCGR1BP	TPSB2
LPAR1	FBLN5
TBC1D5	CTSF
NCF4	ANXA11
SCARB1	ANGPT4
PLEKHG5	HPSE
TLR1	CTSZ
ATG12	NTN1
RAB5A	ANGPTL3
DYNC1LI1	SDC3
AVPR1A	CTHRC1
RAB38	SERPINB1
CD82	LOXL2
STX4	ADAMTS12
CTSL	CCN1
HLA-DRB4	FCN1
RAB24	OMD
RAB11FIP3	IGFBPL1
CACNG2	MYOC
HLA-C	RARRES2
HVCN1	HPSE2
AP2M1	TPSAB1
HLA-F	COL13A1
SLC15A2	LAD1
AVPR2	TIMP4
PIK3R4	FCN2
CACNG4	COL12A1
AP2A1	SHH
CPNE6	MATN2
RAB9B	LRIG2
CDC42EP4	PRG4
FZD4	SPOCK2
MYO6	SBSPON
HLA-G	AMELY
DPP4	AMELX
ATP6V0C	EGFL6
ATP6V0E2	AEBP1
TLR6	IMPG2
STON1	MUC4
DMBT1	S100A4
RAB23	LGALS9
OCLN	SPN
RAB22A	ACAN
RAB17	TNR
RABGEF1	ADAMTS18
STAM2	HTRA1
ADRB2	ADAMTS19
EHD1	ADAMTS15
STXBP1	ADAMTS16
ATP6V0D1	ADAMTS17
RIN1	TGFBI
RAB32	UCMA
RAB31	PLOD2
PTCH1	AGRN
TAPBP	SERPINF1
RAB13	PCOLCE
RAB7A	SULF1
RAB5C	TIMP2
DLG4	PHOSPHO1
NCF1	PXDN
HLA-E	POSTN
LPAR2	EPYC
NOD2	COL27A1
ITGAV	LAMB4
UVRAG	LEFTY2
CUBN	GLG1
SNX3	MXRA7
PLA2G5	CLIC3
LRP1	HMCN2
RAPGEF2	ANGPTL6
ABCA1	OPTC
cubam_human	FLG
LTF	F13A1
TFRC	LAMA4
CLTB	RELL2
CLTA	TFIP11
VAMP8	RBP3
SPARC	BCAM
SYT11	ZP4
RAB9A	EFEMP1
HLA-DRB3	CTSL
RAB11A	PRG2
ARF6	F3
CD207	OC90
CACNG3	EMILIN1
SFTPD	PRG3
SLC18A3	MMP24
SYT7	GPC6
AREG	ENTPD2
SLC11A1	COL22A1
TGOLN2	COL9A1
KIAA0319	SERPINE2
BECN1	ADAM19
STX6	LINGO1
MPO	ADAMTS1
FZD2	EGFL7
AMBRA1	LAMA3
ZDHHC5	LRRN3
FCGR1A	PLAT
ECPAS	F12
WAS	PLG
HBA1	F9
HCLS1	MMP17
ARRB2	F2
MTSS1	LOXL4
RAB39A	LRIG1
ATP7A	HAPLN1
GRIA3	ITGB4
HLA-DQB2	OGN
FLOT2	MATN4
CTTN	PZP
RAC2	IGFBP7
SCARF1	FCGBP
TRIM14	DMBT1
SLC48A1	LAMC3
CAMK2D	FCN3
CAMK2G	GP1BA
CAMK2B	ADAMTS10
PIP4P1	CTSD
DRD2	ECM1
PICALM	ANGPTL2
TCIRG1	ADAMTS6
FZD5	ADAMTS7
CLCN3	EFEMP2
GSN	TECTA
NRXN1	COL8A1
CYBB	COL5A1
SCIMP	ADAMTS5
RAB43	MEPE
RAB11FIP4	ESM1
CORO1A	SMOC1
EPGN	TNC
HLA-DRB5	CHADL
PICK1	FGF10
ENTPD7	GPC5
DYSF	NID1
STX8	ADAMTS8
B2M	LTBP3
HEATR5A	ENAM
WNT5A	MUC5B
FFAR4	SPON2
WNT3A	COL24A1
SCGB3A2	COL4A1
LRP2	COL3A1
ATP6V0A4	COL2A1
TAP2	COL1A1
TAP1	EYS
CD163	MMP8
HLA-DPB1	IMPG1
HLA-A	MMP25
HSP90B1	ANXA7
TLR7	DMP1
MTMR4	MATN3
SPHK1	ITIH2
SLAMF1	WNT2
RAB10	ANXA4
RAB5B	ZG16
RAB8A	MGP
SLC2A8	CBLN4
STAB1	PF4
HSP90AA1	AHSG
CAMK2A	ORM1
RILP	SPARC
ATP6V0E1	APOH
EHD2	C1QC
EHD3	OTOG
CAV1	LOXL1
PLD1	LGALS3BP
RAB14	MMP10
NLGN3	MMP7
LDLRAP1	RTBDN
MCOLN1	PODNL1
CLTC	MMP12
ELANE	TINAGL1
MDM2	HNRNPM
HEATR5B	VEGFA
HLA-H	ADAMTSL3
HLA-B	ICAM1
TF	ITIH4
HPX	IHH
AP2A2	LMAN1
HBB	COL4A6
RAB8B	THBS4
VAMP7	THBS2
LRRK2	COL8A2
AVP	SERPINB6
TGFA	VWA1
EGF	FGF1
LDLR	COL15A1
ITGB5	ADAMTS20
RALA	ELN
SFTPA2	COL5A2
SFTPA1	TGM4
CD9	ALPL
CHRM2	SERPING1
WNT4	SERPINA5
AMOT	SERPINE1
TLR2	S100A8
BTC	IGFALS
VIM	LRRC32
HLA-DQB1	ANGPTL7
HLA-DQA1	EDIL3
HLA-DQA2	THSD4
HLA-DRA	ADAMTSL5
SYT1	CDH2
LAMP1	CCN2
COLEC12	COMP
IGF2R	PCSK6
CD4	LINGO3
SFTA3	COL6A3
RAB7B	COL6A2
UBA52	COL6A1
RPS27A	COL11A1
SCARB2	OTOGL
GRIA1	ACHE
GRIA2	COL6A6
MTOR	ANXA2P2
MSR1	LRRC3C
INPP5B	MUC17
GRIA4	FREM3
STX12	TGFB1I1
CTSS	CTSG
TIRAP	OTOL1
WASL	SERPINH1
GOLIM4	S100A10
ARRB1	FLRT2
DAB2IP	GFOD2
ATG5	ADAMTS4
CALR	NDP
VPS11	P3H1
EGFR	lam221-nid1_human
UNC93B1	lam211-nid1_human
SAA1	LRRC24
SFTPC	TIMP3
STXBP4	LAMA1
ACE2	DGCR6
AMN	ADAMTSL2
IRGM	VWF
RAB11FIP5	KRT1
MPEG1	TLR3
SGIP1	A1BG
GAPVD1	CLEC14A
GNLY	HRG
NOS3	LRRN1
ATG14	NPNT
ANXA3	VIT
HGS	CCBE1
EREG	C6orf15
DNM2	AMTN
APOE	SNORC
APOA1	CLC
RINL	HRNR
RAPGEF6	APLP1
RAB35	GPC3
VAMP2	S100A7
CSF3	MMP26
RAB34	LGALS3
WNT7B	MXRA5
WNT3	MMP23B
WLS	PSAP
HBEGF	MMP15
CSF3R	WNT5A
CACNG8	MFGE8
STON2	COL10A1
LMBRD1	SPON1
SFTPB	ADAMTS13
LYN	CCDC80
SEC22B	PRTN3
VAMP4	HSPG2
FLNB	MMP9
APOB	SRPX
PIP4P2	RELN
CD74	LRRTM3
CD3D	LRRTM4
CYBA	FREM1
LAMP2	LAMC2
APPL1	NTN4
PGLYRP1	LMAN1L
CD3G	ITIH5
ROR2	HAPLN4
OCRL	RTN4RL2
NCF2	HSP90B1
BTBD8	PKM
WNT6	LRRTM1
PIKFYVE	LAMA5
INPP5F	ADAMDEC1
	SDC2
	DST
	PLSCR1
	SEMA3B
	MMRN1
	ANGPT2
	HSP90AA1
	MMRN2
	TNN
	RTN4RL1
	CTSB
	EMILIN3
	FMOD
	DSPP
	FLRT1
	FLRT3
	CHAD
	lam111-nid1_human
	MFAP5
	ANXA1
	CSTB
	HMCN1
	HAPLN3
	HAPLN2
	ADAMTS3
	NYX
	SPP2
	SERAC1
	ITIH1
	matrilin4_human
	GDF10
	PODN
	IFNA2
	matn1-matn3_human
	COL6A5
	COL28A1
	ELANE
	ADAMTS9
	FGA
	FGG
	COL4A2
	COL20A1
	MMP20
	FBLN7
	APCS
	C1QA
	C1QB
	FN1
	AMBP
	HPX
	DCN
	DPT
	ABI3BP
	HSD17B12
	SNED1
	ANGPT1
	TFPI2
	PRELP
	LUM
	HDGF
	EGFLAM
	GH1
	NPPA
	TGFB1
	PDGFB
	FGFBP3
	LOX
	NDNF
	BMP7
	matrilin3_human
	TNFRSF11B
	CD151
	matrilin2_human
	TGM2
	matrilin1_human
	MATN1
	ANXA6
	CHI3L1
	LINGO2
	WNT4
	MMP13
	GREM1
	PLOD3
	ANXA5
	F7
	GPC1
	CFP
	SERPINF2
	CCN5
	CCN3
	KNG1
	TIMP1
	NAV2
	P3H2
	A2M
	AGT
	SERPINA3
	SERPINA1
	SERPINC1
	CDON
	FREM2
	MFAP4
	MFAP1
	COLEC12
	MFAP2
	CDH13
	LAMB2
	COCH
	DAG1
	NID2
	AZGP1
	ELFN1
	CPA3
	FBN2
	FBN1
	TNXB
	THBS3
	tenascin-r_human
	tenascin-x_human
	tenascin-w_human
	COL9A2
	COL9A3
	MUC6
	collagen_xi_human-2
	collagen_xi_human-1
	collagen_x_human
	LTBP2
	LTBP1
	VASN
	COL5A3
	CLEC3B
	COL16A1
	ZP3
	MDK
	L1CAM
	COL19A1
	ACTA2
	TGFB2
	CXCL12
	CSPG4
	FRAS1
	GDF15
	ANGPTL5
	COL23A1
	CTSS
	COL18A1
	SPARCL1
	EFNA5
	CD180
	LAMC1
	COLQ
	DEFA1
	FGL2
	CALR
	MEGF9
	MMP28
	TINAG
	SFRP2
	CRELD1
	WNT8A
	VWA2
	BCAN
	WNT11
	LINGO4
	ADAMTSL4
	TRIL
	LRIG3
	COL1A2
	FGL1
	EMILIN2
	ANGPTL4
	COL25A1
	ASPN
	MMP2
	MMP3
	SOD3
	PI3
	C17orf58
	SOST
	CPN2
	SPOCK3
	COL4A5
	MMP27
	ZP1
	CASK
	ORM2
	emilin2_human
	OLFML2B
	OLFML2A
	FGB
	APOC3
	LGALS1
	APOE
	APOA1
	SRPX2
	LRRC15
	ECM2
	MMP19
	PTX3
	FGFR2
	BGN
	WNT3
	ADAMTS14
	CD248
	MST1
	LRRC3B
	SERPINB12
	THBS1
	LAMA2
	LAMB1
	FBLN2
	MUC5AC
	CRISPLD2
	TGFB3
	ANGPTL1
	CILP
	FIBCD1
	FBLN1
	VWC2
	CRISP3
	KAZALD1
	ELFN2
	CTSH
	LGALS4
	KERA
	COL4A3
	SPOCK1
	WNT6
	ADAM11
	APOA4
	S100A6
	S100A9
	EMID1
	COL26A1
	USH2A
