# Supplementary material for: Beyond One-Size-Fits-All: Cancer Biology Shapes Nanoparticle Behavior
Source: Research Square preprint supplement (doi:10.21203/rs.3.rs-7865764/v1), 2025-11-03
Supplement: Supplementary file 3 [file 597f67df3c4bd33909d289fc.xlsx]

## Sheet: Imput_all_Cells_New
Gene	Protein	A549_R1	A549_R2	A549_R3	A549_R4	Hela_R1	Hela_R2	Hela_R3	Hela_R4	KM12C_R1	KM12C_R2	KM12C_R3	KM12C_R4	MCF7_R1	MCF7_R2	MCF7_R3	MCF7_R4
IGLV3-9;IGLV3-21	A0A075B6K5;P80748	562.842	140.387	4768.61	121.059	548.968	1051.89	68.3927	1206.88	103.715	803.796	2094.31	16875.5	15786.1	5048.47	3434.48	53173.6
GATD3B;GATD3	A0A0B4J2D5;P0DPI2	1333.41	1627	2455.63	2190.3	2491.41	2581.42	2343.28	2168	2711.78	2710.65	2258.26	2749.83	3800.27	5032.14	4604.89	4632.51
RBM47	A0AV96	1570.4	1046.33	934.685	1008.92	135.923	216.311	375.313	209.665	1197.58	1232.53	1188.15	1139.68	701.365	640.741	822.965	566.423
UBA6	A0AVT1	2378.1	1778.23	1761.48	1904.39	2264.97	2281.11	1941.97	2311.23	3142.35	2884.47	2872.23	2819.7	2828.5	2694.87	2595.78	2616.71
ESYT2	A0FGR8	3370.58	2613.72	2657.07	2539.5	1657.03	1691.59	1308.98	1402.74	2122.81	1854.99	1992.4	2076.74	2871.91	2680.2	2602.56	2972.8
MED19	A0JLT2	90.7378	392.836	350.107	338.248	254.334	204.337	328.635	252.686	416.508	466.028	562.797	419.533	494.333	402.064	476.258	388.88
BLTP3B	A0JNW5	317.247	361.582	241.393	214.213	145.396	245.274	168.238	178.65	262.243	132.038	156.464	218.959	192.349	186.969	149.982	233.1
SHTN1	A0MZ66	6955.62	5465.74	6001.58	5824.1	2333.72	2099.53	2217.49	2334.77	1235.91	1417.42	1248.46	1268.12	4469.15	3880.75	4965.58	4259
TMEM223	A0PJW6	746.955	516.886	175.022	490.504	529.06	1084.17	1069.84	906.203	365.151	623.766	118.824	547.751	699.608	170.532	448.223	363.668
MEX3A;MEX3C;MEX3B;MEX3D	A1L020;Q5U5Q3;Q6ZN04;Q86XN8	108.116	186.458	124.137	255.431	221.464	201.604	89.1996	252.313	269.56	276.225	394.629	118.257	359.015	562.348	402.338	268.17
ILVBL	A1L0T0	935.529	1070.88	1091.72	896.795	766.399	917.845	868.204	743.738	768.654	724.994	707.547	803.76	3194.51	2614.89	2987.39	2816.54
PLEKHG3	A1L390	287.238	129.385	166.608	150.807	108.982	133.078	114.049	172.765	55.7706	56.0736	127.145	85.9514	158.007	89.1024	108.205	161.238
SH3PXD2B	A1X283	2662.04	2060.91	2061.86	2144.14	3008.48	2869.47	2115.78	2389.17	1784.55	1740.29	1559.93	1880.69	1150.81	753.214	1042.38	996.505
NBAS	A2RRP1	255.359	277.984	266.549	287.164	226.66	190.464	192.36	216.994	220.063	240.091	215.989	253.577	282.353	275.861	342.616	362.617
TARS3	A2RTX5	444.741	141.913	136.869	240.859	63.9486	142.194	96.214	201.679	103.234	133.556	70.9136	71.8608	49.2964	185.174	107.368	115.316
TYW5	A2RUC4	217.965	350.947	299.708	406.639	355.121	190.995	389.356	186.901	321.053	97.9101	75.747	291.171	223.484	384.743	324.525	324.353
VWA8	A3KMH1	654.071	522.137	612.072	538.469	527.185	686.003	581.784	549.149	909.499	974.054	903.652	1027.07	1054.03	1093.2	1041.28	1030.86
SBNO1	A3KN83	1562.74	965.355	998.376	999.315	886.386	1013.61	935.683	1165.11	2529.93	2291.76	2331.51	2368.16	1251.34	1162.25	1090.85	1140.38
GTPBP10	A4D1E9	971.568	516.343	617.141	640.5	919.359	570.215	723.908	772.396	536.624	438.063	433.931	467.876	396.427	325.991	455.958	319.346
WDR91	A4D1P6	639.368	702.911	667.093	614.077	691.251	631.02	636.888	708.317	324.303	372.847	264.372	333.187	303.634	364.457	239.824	376.076
POTEF	A5A3E0	8563.3	2621.7	2089.5	2009.68	2176.16	2060.04	2038.07	2002.74	969.186	857.45	1257.17	1343.52	1615.87	1614.18	1852.89	2016.94
TRAPPC13	A5PLN9	156.52	471.112	303.327	492.781	659.816	562.87	158.126	881.945	340.914	371.574	318.942	656.285	637.87	554.104	527.198	466.971
CNOT1	A5YKK6	2703.89	2058.63	2231.54	2158.36	2084.24	2196.91	1951.21	1934.75	2811.39	2657.64	2433.71	2618.44	2814.83	2747.67	2543.27	2817.05
MAP1LC3B2;MAP1LC3B	A6NCE7;Q9GZQ8	792.336	881.558	1400.97	992.058	1067.92	1171.93	1650.52	1337.29	2163.11	1783.08	1859.21	2209.47	1903.97	1910.82	1542.12	2300.91
FAM83G	A6ND36	357.291	921.958	222.021	177.596	148.392	226.71	137.961	82.7221	326.222	351.342	319.194	363.156	216.46	220.897	216.281	100.885
PGP	A6NDG6	3888.96	3306.56	3219.38	3458.96	4141.62	3924.8	3603.06	4342	3206.61	3134.6	3269.07	3125.15	6042.81	6128.06	6460.74	6405.09
RIMOC1	A6NDU8	807.862	524.988	583.727	625.338	1171.1	1603.13	1238.5	1442	519.125	473.702	318.826	497.699	1016.12	984.958	1030.4	1019.58
RCCD1	A6NED2	521.109	574.8	802.428	714.021	739.938	804.039	1350.62	1174.68	282.75	267.609	134.937	301.545	506.96	512.209	540.601	543.796
ANTXRL	A6NF34	1225.86	1990.39	121.123	1929.61	4515.48	6040.46	1398.21	6172.88	2990.39	162.207	3934.14	2927.46	150.554	6169.48	8225.93	6021.12
ZNF316	A6NFI3	138.281	233.666	225.925	269.009	443.708	130.036	250.667	229.595	320.563	385.037	486.058	483.154	850.53	859.195	679.64	711.689
SMCHD1	A6NHR9	767.791	558.93	791.587	714.555	1253.31	1203.36	1109.52	1206.95	797.862	744.197	864.61	719.958	1167.21	1191.84	1120.61	1113.71
CASTOR2	A6NHX0	758.098	1373.29	1336.66	1586.98	408.292	439.086	300.62	472.004	256.845	194.244	259.121	308.573	457.966	596.949	526.185	619.554
UNC119B	A6NIH7	1076.05	867.863	798.471	878.244	961.166	684.476	523.016	763.559	1068.06	1126.11	1087.45	1169.06	1170.86	1117.72	1161.6	882.375
METTL15	A6NJ78	453.306	470.628	347.434	361.956	464.056	411.702	487.022	384.718	547.346	426.235	242.622	359.376	500.752	541.827	402.498	404.079
SAC3D1	A6NKF1	75.0849	68.7154	1397.26	344.414	685.387	665.07	671.977	671.501	595.481	667.399	680.309	560.665	493.271	548.693	600.546	429.22
ZSWIM8	A7E2V4	299.967	593.613	720.124	379.536	348.127	474.07	860.179	590.269	260.666	241.138	249.99	386.169	619.97	542.35	783.968	560.611
ARHGAP32	A7KAX9	104.895	61.2621	365.531	145.084	153.955	415.177	148.676	89.6848	304.424	230.35	221.532	225.64	214.804	180.659	227.705	157.294
A2ML1	A8K2U0	117.557	1140.25	665.367	95.7002	634.036	417.031	515.249	876.064	4719.76	3413.52	3333.52	5195.96	785.59	539.072	317.72	773.749
SNRPGP15;SNRPG	A8MWD9;P62308	1946.81	3478.75	3899.33	2942.07	3340.1	2785.78	3896.32	3418.24	4531.42	4581.05	3518.57	4913.35	3231.49	3899.58	4241.62	3607.56
NUDT19	A8MXV4	1291.42	1024.5	987.941	1064.61	397.716	401.403	343.846	403.347	1469.27	1571.14	1212.57	1424.09	256.79	225.43	338.251	312.176
MIF4GD	A9UHW6	119.784	92.3495	223.227	332.327	141.593	369.716	118.197	48.8881	231.043	80.9852	210.938	140.755	267.897	277.378	351.341	129.288
GPR89A;GPR89B	B7ZAQ6;P0CG08	741.846	434.559	421.704	292.794	630.918	438.612	749.231	541.617	353.905	309.162	246.991	407.668	592.864	759.849	708.747	811.589
WASH3P;WASH2P	C4AMC7;Q6VEQ5	1620.33	1175.8	1293.49	1256.25	822.438	863.37	629.696	861.197	385.094	464.696	660.266	396.354	1214.17	1306.98	1283.57	1200.87
TMEM238	C9JI98	562.09	418	631.902	696.292	137.701	171.857	188.114	90.9074	1631.11	1584.73	1374	1688.02	824.455	871.43	900.601	714.975
NACA	E9PAV3;Q13765	5529.04	7614.47	9775.94	7636.96	9288.67	12392	12589.2	11636.4	9124.62	9466.52	8788.54	10059.8	7067.62	7961.37	6165.7	8974.95
C11orf98	E9PRG8	2801.65	1702.98	1660.58	1832.57	1294.34	1340.15	1199.59	1064.19	1666.59	1631.45	1846.98	1509.59	2204.51	2154.86	1981.32	1954.4
ASDURF	L0R819	1589.99	1342.6	1196.9	1021.53	1092.96	1553.86	1220.43	758.941	836.647	770.836	788.106	534.803	728.587	600.267	596.174	789.21
DNASE2	O00115	978.955	470.603	585.441	717.637	1348.65	1350.42	1070.77	1189.59	464.286	442.114	453.126	493.796	1387.97	1526.87	2030.7	1710.79
AGPS	O00116	5198.08	3778.54	4300.37	4168.85	1691.03	2291.65	2040.99	2004.65	2058.21	1876.42	1777.69	2072.96	44.9871	77.0214	116.407	109.257
KIF2A	O00139	1253.42	1131.7	1381.87	1173.75	1785.57	1724.72	1943.78	1838.13	2169.81	2224.75	2105.97	2067.28	1650.81	1541.7	1576.73	1640.24
DDX39A	O00148	23567.9	20875.6	24948.6	21706.3	25615.1	25859.2	26097.4	26146.1	29220.9	28760.7	28708	26743.9	22292.2	23240	24063.3	23634.8
PDLIM1	O00151	8490.87	7691.06	8474.85	6479.07	2720.78	2672.63	2275.44	2166.52	2395.58	2542.06	2006.91	2146.5	922.005	1654.73	2888.98	1788.67
ACOT7	O00154	3120.21	2513.94	2045.94	2534.55	3033.03	2885.38	3039.92	2799.06	6713.03	6491.22	6318.15	6288.22	5697.67	5344.95	5536.06	5514.79
MYO1C	O00159	6996.62	6316.32	6725.89	6211.92	2662.17	2869.21	2365.63	2530.44	2444.98	2408.4	2120.81	2397.72	3446.29	3421.14	3320.64	3101.91
SNAP23	O00161	799.448	738.412	641.543	624.723	736.681	713.095	704.555	593.65	596.93	782.55	783.408	674.399	370.836	359.238	306.675	280.935
HAX1	O00165	609.622	671.518	675.037	697.733	550.253	638.758	717.213	397.709	823.605	819.906	689.948	725.901	637.414	599.749	673.5	686.894
AIP	O00170	3574.82	3002.38	2776.77	2721.91	3040.41	2842.74	3019.39	2756.95	2422.33	2529.86	2752.66	2459.58	3189.59	3431.18	3460.95	3566.05
GTPBP1	O00178	1180.39	609.757	574.094	597.461	1249.78	1315.9	1248.43	1296.17	1150.61	1010.41	1300.64	1067.77	792.116	898.601	778.893	881.267
STXBP3	O00186	2229.61	1596.72	1499.11	1616.22	729.111	800.45	819.037	821.77	1004.03	983.947	1004.69	906.946	1625.9	1639.19	1595.96	1596.25
AP4M1	O00189	1020.02	671.202	683.372	662.579	699.258	803.802	626.911	1070.06	274.123	269.913	456.36	370.099	1041.05	1087.51	1345.79	1187.24
SMAP	O00193	4934.63	4357.65	4292.17	4348.77	3416.09	3080.81	3398.18	3521.03	3686.4	3980.25	4298.42	3141.72	3621.41	3790.39	4328.47	3151.63
RAB27B	O00194	1814.77	2058.02	1786.13	1498.17	430.862	792.174	374.963	447.924	167.509	156.67	175.843	133.393	1006.4	1104.58	1040.03	911.116
AP3B1	O00203	3338.77	2559.25	3164.88	2923.53	2582.05	2711.31	2512.24	2557.94	3533.6	3592.34	3512.69	3598.5	3464.1	3498.46	3177.47	3474.07
SULT2B1	O00204	2632.8	2799.9	3415.86	2920.61	394.31	455.857	486.333	344.719	703.732	595.226	1014.14	712.971	3407.71	2899.13	3145.54	3247.44
LGALS8	O00214	93.1523	405.515	334.408	311.863	358.975	229.731	289.594	438.54	389.185	263.297	276.476	339.355	441.153	448.727	550.177	517.531
NDUFS8	O00217	127.91	390.814	457.616	450.983	190.858	120.129	359.631	62.773	273.055	354.475	240.5	240.372	208.768	221.602	128.637	141.919
TNFRSF10A	O00220	2497.58	2802.05	2319.36	1163.97	3802	4531.44	5345.15	4101.8	2090.41	1438.23	2947.4	3844.36	1443.47	1924.14	1818.31	2775.33
PSMD11	O00231	6259.78	6686.78	6896.52	6769.18	4842.83	5364.69	5426.76	5601.09	6016.88	5710.17	6014.15	5840.95	7078.89	7032.59	6697.48	6920.02
PSMD12	O00232	5902.04	6443.59	6716.47	6355.82	4786.4	5176.3	5208.27	5341.02	6326.83	5882.69	5925.28	5860.46	7247.93	7559.62	6839.14	7312.18
PSMD9	O00233	3028.36	2734.22	2773.7	2695.3	1391.49	1568.55	1466.68	1412.09	3252.59	3122.06	3675.33	3211.94	3379.35	4332.48	4733.67	4157.39
MEN1	O00255	139.937	105.098	237.844	258.965	186.654	256.668	208.75	285.119	236.021	320.026	285.819	353.126	481.802	434.409	353.727	447.696
CBX4	O00257	94.2145	2910.1	3048.22	4059.43	3082.47	4380.58	2326.83	2982.65	2085.34	2279.3	2382.78	2660.32	4378.04	3903.86	6417.36	5834.35
GET1	O00258	147.654	370.104	131.778	478.257	58.3539	100.697	128.936	511.398	243.313	301.58	266.507	364.281	516.074	565.384	462.935	507.94
PGRMC1	O00264	3639.46	2616.27	3638.59	3089.62	2445.18	2021.63	2140.69	1906.03	3044.4	3337.91	4869.87	3883.36	1102.66	2397.9	2203.62	2394.32
SUPT5H	O00267	1029.89	918.29	944.213	1017.04	798.62	787.853	858.717	913.549	1477.75	1457.92	1519.9	1409.72	705.882	724.494	765.644	759.769
TAF4	O00268	517.315	359.645	449.597	353.963	360.938	329.424	398.185	465.41	458.594	506.974	448.651	479.621	581.153	520.023	576.57	519.119
DFFA	O00273	1614.06	1112.85	1502.69	1264.21	1353.96	934.719	1109.63	1132.27	1482.9	1423.24	1021.5	1295.46	387.715	884.808	972.419	820.902
HIP1	O00291	906.917	642.454	618.946	555.052	248.609	250.034	145.927	273.149	283.84	341.588	320.546	255.409	384.575	347.006	323.705	252.153
CLIC1	O00299	48818.4	42412.3	39602.7	38903.3	18041.4	19391.5	18859.8	19992.5	27711.4	23863.5	27750.2	28023.2	25307.5	31652.6	39404.7	34871.1
EIF3F	O00303	6196.9	4322.39	4948.03	4457.52	4056.95	4706.31	4214.52	4039.02	4937.73	4604.97	4903.28	4739.47	3562.63	4038.57	3539.34	3997.03
WWP2	O00308	98.8533	1170.39	868.434	309.295	673.948	279.928	118.44	457.466	742.146	722.655	835.644	903.271	971.246	906.238	1071.38	908.564
PDHX	O00330	1046.94	889.636	836.8	1044.32	783.071	915.125	793.281	870.62	1861.48	1722.2	1761.48	1881.93	826.121	708.194	683.027	780.322
QSOX1	O00391	488.849	507.829	684.084	644.01	482.659	596.819	698.404	145.855	956.984	661.145	850.805	926.905	2385.3	2049.4	1990.96	2039.48
DCTN6	O00399	815.985	671.127	527.4	741.998	831.902	515.928	415.079	593.176	593.659	593.98	476.918	253.751	737.947	721.457	808.765	486.232
SLC33A1	O00400	1762.26	946.463	1504.24	1112.31	500.238	406.348	342.233	489.327	388.252	439.168	428.43	538.329	216.679	451.536	319.413	317.209
WASL	O00401	5597.47	5113.88	5470.01	4947.58	3800.6	3652.87	4134.9	3935.03	3488.73	3678.49	3327.58	3546.2	4356.13	4601.84	4803.3	4671.07
IPO5	O00410	2467.48	2302.85	2292.17	2319.18	4792.65	5220.15	4455.89	4549.1	4855	4653.34	4555.28	4677.84	2349.31	2423.71	2228	2309
POLRMT	O00411	464.875	453.523	455.162	433.197	394.007	468.258	268.872	307.302	587.168	747.112	605.636	671.356	131.301	226.227	112.845	235.048
EEF2K	O00418	945.072	816.823	825.754	722.336	671.506	619.335	542.117	569.612	605.57	695.572	638.649	675.68	882.756	887.596	1041.49	858.009
SAP18	O00422	4396.99	3341.74	3514.78	3516.22	3907.69	4509.77	4569.7	3766.29	5472.4	6307.98	6494.32	5914.33	4275.72	4449.28	4922.31	4348.09
IGF2BP3	O00425	6704.92	6155.75	6703.09	6322.37	5678.56	6229.54	5567.74	5220.78	1923.79	1853.87	2150.15	2159.63	651.285	710.922	985.233	608.855
DNM1L	O00429	4071.28	3521.7	3657.07	3547.1	3476.13	3682.23	3772.56	3518.71	3446.09	3208.11	3579.47	3288.62	2661.84	2517.71	2807.96	2558.48
RTCA	O00442	1226.17	919.783	899.301	965.963	410.724	409.018	413.141	412.953	715.447	542.928	542.253	647.433	566.335	470.199	404.758	507.347
PIK3C2A	O00443	859.767	633.361	829.96	773.826	455.743	500.574	495.361	461.02	754.603	645.853	641.021	812.935	744.433	675.334	620.069	753.594
PIK3R2	O00459	238.402	174.298	230.896	200.241	203.547	152.849	204.341	70.0866	85.5951	82.185	89.8845	181.464	582.709	505.07	449.591	510.103
GOLIM4	O00461	734.144	730.223	888.272	802.795	856.058	1193.37	980.442	1006.23	437.046	557.163	514.425	509.955	432.131	352.444	274.071	385.895
MANBA	O00462	346.426	441.821	285.808	328.536	482.813	640.134	390.15	215.314	445.062	351.058	418.211	410.842	602.914	675.467	718.624	816.375
AGRN	O00468	924.78	593.215	788.266	831.05	1300.28	1195.82	953.178	948.554	435.109	471.246	372.969	542.84	540.841	440.807	398.544	721.502
PLOD2	O00469	3663.75	3956.18	3501.18	2803.69	4966.43	4530.94	2335.1	3203.23	1504.35	1249.38	371.525	1746.27	3400.44	2519.17	2574.88	3165.94
EXOC5	O00471	1991.19	1600	1838.07	1611.95	868.905	761.823	933.217	858.779	954.048	790.129	836.071	859.714	1040.46	1119.49	1114.19	1036.72
HMGN4	O00479	949.052	897.807	713.982	673.211	887.979	853.988	713.865	848.535	594.97	512.883	470.772	681.302	625.27	539.506	927.803	863.515
NDUFA4	O00483	1047.4	1011.35	1220.65	1487.69	801.335	1126.23	359.107	484.722	985.416	941.537	894.647	899.014	690.521	816.798	740.158	461.026
PSMD14	O00487	7862.7	7408.94	6935.92	7111.68	5701.6	5976.7	6280.62	5960.24	7005.05	6578.31	6529.75	6543.96	7857.44	7651.69	7223.2	7528.22
ZNF593	O00488	424.182	398.939	339.14	437.621	604.374	578.947	515.007	650.092	770.475	672.931	519.612	597.135	722.095	573.38	720.813	538
BIN1	O00499	1800.22	1266.01	1555.32	1603.45	758.05	696.482	597.46	703.469	656.594	609.913	611.238	629.267	193.528	101.104	58.8987	95.9609
KPNA3	O00505	1440.79	1432.51	1235.44	552.276	2072.14	1652.82	1501.7	1512.9	1596.61	1546.68	1547.87	1438.96	1953.81	1668.5	1795.79	1542.56
STK25	O00506	335.659	535.047	540.152	543.048	660.87	767.49	386.609	723.452	485.028	615.311	551.914	558.962	906.782	548.277	744.95	887.558
FAAH	O00519	163.489	78.0635	145.976	121.337	177.272	199.559	125.55	116.683	358.09	590.3	591.301	345.255	1073.78	1102.82	1343.27	1218.97
PES1	O00541	3860.76	3581.91	3682.81	3495.7	2959.45	2800.18	2880.4	2787.13	4990.11	4493.46	4586.01	4586.21	3215.86	2935.76	2791.08	3357.33
SDCBP	O00560	1469.26	1222.81	1235.34	1256.63	1702.44	1920.85	1387.06	2134.8	1822.29	1483.98	1448.82	1932.17	552.369	462.457	470.435	472.269
PITPNM1	O00562	898.402	792.549	951.959	826.501	539.153	597.113	709.917	619.213	602.737	122.023	232.162	130.401	125.55	93.1703	64.9448	929.625
MPHOSPH10	O00566	1008.01	647.582	839.395	777.168	521.214	514.641	482.471	484.612	858.216	727.757	920.835	842.486	637.75	596.166	554.53	605.757
NOP56	O00567	5850.03	4938.16	5057.46	4921.7	3702.28	3973.86	4130.16	3828.61	5014.79	5060.96	4727.32	4791.14	3123.54	3042.72	3166.48	3101.81
DDX3X	O00571	8733.53	7968.06	8897.9	8035	8750.31	9093.87	9408.75	8971.85	7817.1	7725.06	7967.68	7660.01	8112.3	8256.37	8046.97	8049.92
RNASET2	O00584	392.139	304.694	331.158	170.432	170.574	312.804	163.11	517.699	191.519	97.727	169.632	261.309	378.014	481.086	584.215	565.947
PODXL	O00592	765.672	618.362	865.439	670.357	12802.3	13537.8	13963.3	16119.3	2253.74	2722.03	2338.69	2725	2347.8	2381.58	2366.26	2287.73
PIR	O00625	5178.83	4486.29	4219.53	4645.76	3753.55	4291.16	4431.69	4424.34	1355.94	1201.51	1251.54	1247.15	2233.07	2042.52	1927.26	1973.18
KPNA4	O00629	1506.28	1750.78	2154.45	2094.85	1904.81	2207.81	1567.85	1646.84	1890.95	1871.96	1765.45	1964.68	1421.84	1516.26	1727.35	1430.53
NFIB	O00712	1007.53	419.56	704.08	1029.35	818.931	778.292	1074.75	924.386	202.451	246.094	115.897	214.443	312.348	264.444	293.29	237.768
PPP6C	O00743	2426.81	2130.56	1972.07	1993.92	2470.64	2786.61	3111.29	3137.73	2615.55	2605.1	2430.06	2528.92	3439.67	3359.05	3518.81	3246.74
PIK3C2B	O00750	4617.26	1614.66	2338	1767.05	1961.27	1655.35	75.718	1733.84	1186.07	1466.11	1384.01	1770.76	1655.54	1633.54	1392.66	2298.3
MAN2B1	O00754	854.107	491.965	734.92	535.928	869.586	667.999	415.388	577.925	324.185	328.298	385.835	351.647	536.316	575.677	418.905	575.029
ACACB	O00763	1298.21	1121.02	1029.96	1225.44	2122.14	2205.46	1897.7	1877.15	1058.94	799.96	837.131	1124.31	1730.41	1639.87	1496.48	1553.55
PDXK	O00764	3246.21	3005.31	3024.84	3235.01	1847.85	1720.01	1816.62	2028.07	1775.93	1472.01	1580.01	1758.21	2344.44	2236.32	2296.46	2163.88
SCD	O00767	408.436	810.691	672.251	649.318	1041.79	1167.13	916.05	1053.93	3863.19	3238.63	2382.89	4012.38	7800.13	5501.12	5015.05	5183.79
ARID1A	O14497	683.107	438.271	523.925	475.2	657.68	680.51	695.795	504.642	605.596	729.926	755.73	673.078	679.672	737.2	791.202	761.553
C2CD2L	O14523	116.988	99.4236	156.757	150.017	202.44	135.122	141.813	223.843	90.8274	132.71	165.946	64.3212	284.887	136.875	327.498	231.098
TXNDC9	O14530	995.227	559.919	879.807	702.07	1162.96	1253.64	1163.92	1075.2	580.253	479.444	454.455	518.535	923.675	1055.96	1040.63	983.403
TRAFD1	O14545	95.1255	231.369	78.4357	318.886	360.9	508.601	306.409	349.21	220.554	331.44	204.927	273.089	234.445	423.872	650.011	501.416
UBFD1	O14562	1357.8	1105.95	941.297	1177.55	1232.25	1365.87	1113.51	1131.51	862.563	729.467	803.389	703.438	1401.89	1402.98	1435.41	1281.22
CIT	O14578	122.433	212.924	89.8672	404.533	276.297	258.855	502.248	256.897	575.152	578.333	564.945	477.294	358.682	325.57	279.264	216.406
COPE	O14579	1503.55	2326.74	2491.35	2401.66	1850.6	1587.7	1577.97	1845.72	2158.81	2023.08	2076.22	1996.41	2635.55	2678.22	2439.92	2717.57
AP3D1	O14617	1141.84	1288.2	1402.28	1403.5	1221.12	1102.17	1127.21	1173.53	1695.19	1799.25	1602.09	1693.86	1576.86	1601.87	1572.94	1510.89
CCS	O14618	2029.69	1025.08	1903.73	1193.49	893.408	549.994	599.945	704.768	663.584	703.365	798.34	567.337	844.021	1215.95	1235.57	1061.99
ABLIM1	O14639	1452.72	868.869	1200.79	1143.07	693.903	700.716	680.929	544.231	561.638	685.818	653.697	674.221	157.204	241.966	175.873	86.9654
DVL2	O14641	216.022	203.678	235.617	161.062	342.751	394.587	304.703	286.092	311.123	295.696	312.303	301.37	346.287	330.761	300.919	390.596
CHD1	O14646	8246.5	8048.72	8375.36	7598.1	9584.22	7994.31	6300.5	7095.59	9236	8020.98	11285.8	9485.92	7345.13	7189.72	8863.75	6749.48
CHD2	O14647	339.201	179.221	332.98	321.31	225.391	130.947	184.669	138.687	436.937	370.82	398.914	515.264	305.742	196.566	195.267	289.193
GOSR2	O14653	1592.01	1067.77	1004.83	898.997	899.185	803.506	1037.97	656.47	386.314	337.169	461.295	593.667	1295.73	1129.47	1195.7	874.359
TOR1A	O14656	624.905	542.172	528.101	635.6	621.409	649.519	721.79	675.561	353.579	405.707	311.86	370.561	855.793	841.756	894.062	641.17
TOR1B	O14657	394.923	217.489	286.065	252.596	261.239	226.144	290.403	334.362	175.536	155.479	90.5313	90.3487	295.164	323.112	267.191	266.797
STX16	O14662	527.108	336.073	414.979	527.349	501.101	453.037	537.366	430.233	163.789	159.335	308.942	199.657	1210.45	1134.52	1280.76	1285.63
ADAM10	O14672	2176.39	1907.55	1768.64	1728.7	739.313	621.547	987.45	928.665	1317.54	1047.5	1093.54	1200.27	678.738	507.089	641.216	675.642
EI24	O14681	102.453	251.214	947.646	633.412	307.749	119.639	147.248	507.892	739.464	712.295	901.334	680.596	998.588	908.884	921.011	909.549
TP53I11	O14683	973.529	707.773	966.271	834.109	70.7005	128.307	157.857	100.863	660.239	129.333	97.7149	91.8932	608.133	599.653	898.19	639.024
PTGES	O14684	2097.46	1773.07	1102.13	1589.73	463.057	119.618	1626.57	2612.89	108.167	100.413	89.1145	96.2853	2389.51	1845.48	1530.18	1658.35
KMT2D	O14686	257.112	264.568	170.386	508.656	218.827	194.819	91.6063	180.668	146.814	83.1946	163.743	108.915	185.632	169.279	221.454	209.529
APAF1	O14727	418.23	963.351	1111.84	641.655	954.739	1061.76	1000.9	2508.42	1110.74	1547.97	1339.95	1614.07	752.799	976.29	595.634	1135.39
IMPA2	O14732	2788.64	2699.31	2329.83	2618.87	3521.67	3707.61	4877.95	3860.17	403.546	477.842	594.242	765.425	1340.79	1195.2	1094.81	1564.18
MAP2K7	O14733	430.284	228.902	344.797	319.266	320.231	399.314	367.963	432.753	455.665	359.199	364.522	393.729	224.316	305.526	315.159	371.977
ACOT8	O14734	2166.85	1281.71	1349.13	1334.63	999.052	1330.1	1139.4	1146.7	1542.71	1436.09	1810.42	2009.07	1761.82	1893.82	1951.23	1877.93
CDIPT	O14735	2607.64	2478.77	2396.75	2136.63	2120.06	2080.4	1734.19	1716.14	1123.39	972.714	853.442	1059.86	3670.65	3462.91	3007.57	3914.05
PDCD5	O14737	5203.66	4779.31	4017.89	4061.73	3992.36	3856.6	3816.57	3561.67	3857.55	3877.28	5850.2	3653.61	2354.38	2533.95	2669.19	2775.31
PRMT5	O14744	3833.94	4927.84	5658.72	5327.63	4272.51	4615.68	4796.39	4976.62	6809.17	6691.32	6617.56	6613.32	4687.74	4909.92	4776.51	5045.08
NHERF1	O14745	17622.8	15019.5	14894.6	14436.4	12530.9	12810.5	14040.5	13565.8	4697.4	4488.88	4580.19	4960	41126.6	48269.1	40844.5	48078.2
CHEK1	O14757	1378.2	484.337	449.783	604.267	574.966	926.374	599.03	670.6	1031.32	1050.89	1109.03	788.843	610.59	543.688	531.918	502.013
FPGT	O14772	318.838	438.528	367.778	368.313	121.853	292.59	144.833	240.583	150.673	182.689	214.702	238.103	291.506	231.352	265.16	250.496
TPP1	O14773	9542.55	11060	11795.8	11519.6	6784.55	6206.21	6434.39	4539.05	950.481	996.67	993.324	1224.2	1675.47	1790.48	2747.94	2019.97
TCERG1	O14776	4481.42	3942.5	4110.61	4171.79	3926.32	3908.29	4489.87	4408.96	3439.71	3624.66	3508	3437.97	3874.74	3836.42	3904	4066.47
NDC80	O14777	226.567	101.498	115.199	127.637	330.005	393.66	535.162	571.316	345.184	394.808	348.194	395.227	601.644	562.227	426.839	573.876
NRP1	O14786	2970.46	2042.72	2169.81	2109.53	464.979	492.28	776.723	696.9	398.324	391.381	388.424	374.535	199.384	97.0708	160.204	180.612
TNPO2	O14787	111.408	655.213	580.192	422.763	782.503	661.42	181.881	588.925	997.683	1031.65	887.175	962.752	1752.12	1610.63	1356.48	1627.71
UNC13B	O14795	533.525	389.654	418.214	264.899	291.778	279.471	324.396	328.28	271.902	267.215	321.72	268.629	140.851	218.067	156.013	110.261
POLR3A	O14802	888.413	640.435	797.024	652.827	592.018	566.681	665.911	626.548	576.325	536.954	546.503	603.767	410.648	432.612	423.106	436.318
PSMA7	O14818	13772.6	12012.5	13746.9	12800.5	15130.9	15690.3	17666	16238.8	13030	12571.5	14700.6	13445.1	14936.7	14560.2	14063.2	14966.4
SCAMP3	O14828	2666.4	1974.48	2446.19	2123.67	2573.78	2582.06	1766.82	2594.36	1477.16	1385.34	1403.28	1481.29	1439.95	1200.65	1415.86	1515.9
OPLAH	O14841	1238.13	952.461	878.91	923.175	289.734	313.641	189.125	212.119	135.035	207.842	172.189	189.984	233.974	218.22	245.683	247.359
BCKDK	O14874	591.548	464.558	511.862	520.614	608.405	544.709	889.979	580.732	494.719	487.864	412.495	572.266	1773.23	1799.3	1479.21	1608.47
MGST3	O14880	781.287	6960.4	8923.04	7841.09	2613.97	2498.32	2597.65	3538.93	1691.9	1207.48	1541.47	1619.56	1607.52	1753.25	1483.01	1674.68
TAX1BP3	O14907	903.63	361.451	932.772	604.61	701.812	435.044	415.002	551.139	445.861	499.264	798.496	542.854	467.893	396.495	572.803	499.897
GIPC1	O14908	739.258	776.064	888.142	730.125	782.378	746.782	693.826	729.893	1611.09	1435.89	1338.85	1512.21	1220.88	1116.97	961.453	1214.62
LIN7A	O14910	2143.77	2468.74	3112.46	2714.65	1410.13	1521.66	1313.87	1332.34	1734.1	1757.23	1471.91	1463.81	1666.63	1555.14	1535.34	1875.89
IKBKB	O14920	632.162	370.346	370.55	414.569	578.755	541.106	573.333	523.696	152.364	207.522	143.614	123.135	236.072	213.292	250.912	160.761
TIMM23	O14925	1384.13	1361.37	1309.95	1209.23	907.967	1137.26	1137.08	992.96	864	822.862	835.512	1162.91	689.927	770.156	806.281	1162.62
HAT1	O14929	322.806	266.583	278.826	271.93	974.665	1121.66	943.088	1123.74	781.265	820.762	830.299	753.263	1090.96	1098.82	1134.83	1053.23
CASK	O14936	1861.18	1644.26	1852.04	1789.87	771.499	963.019	919.539	968.976	1160.86	1096.83	1197.44	1138.21	1156.14	1165.5	1288.99	1259.86
PLD2	O14939	156.814	130.618	158.425	130.83	65.0536	77.8036	109.224	527.079	216.646	124.709	156.572	192.783	118.22	89.7407	130.613	100.373
UQCRQ	O14949	3275.7	3705.11	5764.99	5237.34	4371.78	3936.5	3963.81	3334.59	4395.01	3957.17	4223.62	4559.87	4528.87	4037.4	4014.22	3695.7
MYL12B;MYL12A	O14950;P19105	3515.9	6762.64	6616.93	6570.16	4229.99	5203.67	4447.77	5478.99	5785.52	4625.38	4034.09	5680.04	1206.89	1167.7	1065.42	1449.41
HGS	O14964	2657.66	2478.13	2678.77	2798.67	1876.33	1575.85	1795.15	1691.36	2069.47	1923.23	1916.09	2003.04	2736.6	2552.04	2708.37	2862.36
AURKA	O14965	361.803	755.396	619.835	660.628	1043.35	1307.57	1121.48	1185.9	2062.3	2085.44	2142.67	1619.59	1135.24	1057.64	1139.83	1031.35
RAB29	O14966	167.641	327.12	109.927	288.897	176.922	85.8809	98.8873	166.668	344.719	378.336	461.062	457.394	248.08	361.22	358.501	682.17
VPS26C	O14972	967.157	1298.94	1032.29	1137.42	753.824	854.165	647.67	682.829	422.678	93.9908	84.7877	86.2969	84.4705	359.156	139.458	265.335
PPP1R12A	O14974	3209.56	2754.84	3239.62	2801.84	2315.89	2309.66	2593.5	2420.81	2697.36	2686.15	2802.45	2767.91	3696.11	3328.45	3740.75	3317.88
SLC27A2	O14975	2206.8	1864.75	1757.32	2343.55	623.332	828.067	783.658	522.862	1152.59	1118.04	1174.47	1144.02	840.251	861.253	622.766	844.327
GAK	O14976	685.757	556.704	696.351	602.041	633.224	552.559	646.416	527.067	1628.97	1627.1	1535.85	1556.81	884.347	870.049	966.834	909.739
ZNF263	O14978	400.616	432.085	258.207	488.766	1029.93	658.595	945.542	1040.31	337.621	378.457	430.05	468.131	511.02	827.435	815.845	1239.65
HNRNPDL	O14979	5421.82	4287	5193.04	4602.63	6870.78	7522.29	6334.35	6669.68	7157.08	7832.12	8526.99	7407.64	4710.41	4446.34	4841.46	4128.16
XPO1	O14980	5266.58	5579	5948.94	5708.52	5625.77	6073.47	5709.64	6016.72	6251.61	6000.39	5886.67	6187.75	6300.05	6133.46	5573.17	6650.8
BTAF1	O14981	582.047	365.833	487.738	487.419	415.352	544.853	417.362	532.967	549.761	539.967	562.125	552.92	455.712	445.299	408.22	426.167
ATP2A1	O14983	15098.3	15291.4	14926.8	14391.5	5958.53	6348.09	6063.68	6502.25	8229.32	7890.87	8104.37	8480.69	8719.58	7776.1	7005.8	8353.47
ARHGEF10	O15013	137.533	540.949	529.427	397.017	538.383	348.142	528.127	326.28	167.209	182.422	79.2552	132.314	252.109	301.762	120.066	301.624
ZNF609	O15014	471.837	258.629	356.083	361.446	319.423	448.992	365.068	343.661	196.422	100.7	197.336	151.028	310.056	238.312	207.534	360.455
SPTBN2	O15020	323.747	93.696	294.579	273.495	1017.85	1134.93	1107.31	1025.4	208.982	276.189	295.146	229.721	991.708	1013.56	1012.15	1008.23
SEC16A	O15027	1670.82	1374.64	1437.19	1271.57	2242.7	2283.52	2423.68	2319.46	1865.27	1963.47	1820.55	1799.43	2845.45	2774.49	2885.64	2689.68
PLXNB2	O15031	3500.68	2073.38	2490.16	2294.18	2665.84	2665.79	2624.54	2883.82	1423.14	1350.74	1299.39	1538.09	1860.07	1519.58	1684.26	1602.2
KHNYN	O15037	410.052	290	330.801	336.403	218.44	69.3403	86.2931	211.276	60.0226	120.716	125.786	186.221	216.845	321.588	293.896	173.498
U2SURP	O15042	1020.54	1009.02	1051.86	1074.46	972.434	994.567	944.169	943.443	1622.71	1549.54	1465.52	1604.31	1116.04	1136.6	1125.24	1099.35
SETD1A	O15047	291.527	252.992	236.347	246.872	152.443	244.677	262.304	194.009	190.869	218.881	150.509	151.994	169.952	261.001	222.872	208.712
SYNJ2	O15056	833.979	556.966	698.349	645.306	725.786	975.078	373.514	667.641	824.877	698.579	826.259	723.074	404.417	516.697	437.858	497.233
KIF3B	O15066	720.221	781.205	799.9	626.241	427.882	547.461	278.673	299.617	648.128	853.852	578.025	597.15	426.77	404.837	450.366	416.848
PFAS	O15067	5764.5	4969.43	5030.32	4952.63	7034.25	7214.86	7541.82	6484.78	3551.57	3591.65	3660.5	3321.14	3728.24	4203.15	4540.42	4118.79
ANKRD28	O15084	944.801	401.261	356.136	306.379	270.458	384.642	499.312	408.099	603.394	568.28	750.205	566.846	648.088	590.68	724.083	538.398
ARHGEF11	O15085	675.133	267.331	406.64	382.103	253.851	158.674	204.322	74.333	272.717	191.563	294.223	308.809	264.481	169.93	252.719	318.99
PRORP	O15091	279.43	145.801	210.675	120.4	133.396	159.96	186.953	151.284	177.766	215.531	208.375	194.346	276.294	359.552	317.471	365.818
CHUK	O15111	825.895	240.677	580.637	453.139	375.594	350.3	188.549	399.036	654.441	691.331	515.056	686.505	501.698	528.624	363.552	417.626
NPC1	O15118	620.733	215.8	247.797	301.605	481.625	694.459	469.199	695.042	847.8	638.126	468.232	865.043	336.355	335.095	270.072	248.964
AGPAT2	O15120	833.106	586.672	825.054	818.808	80.7347	97.5255	373.552	183.641	692.322	528.94	442.549	386.848	814.933	921.956	890.994	893.928
DEGS1	O15121	625.728	390.423	439.065	366.6	740.643	923.051	491.926	833.816	399.446	317.804	245.693	456.333	553.262	454.339	558.319	470.539
SCAMP1	O15126	2315.48	1857.8	1757.45	1938.92	1007.72	1105.67	1087.18	1133.49	1564.67	1480.84	1520.37	1480.71	2327.37	2274.34	2540.88	2134.74
SCAMP2	O15127	1821.1	1486.1	1456.05	1645.13	795.888	828.655	729.178	975.805	1533.86	1425.33	1310.52	1350.97	1150.07	1242.57	1219.11	1120.51
ARPC1B	O15143	4967.65	6630.43	6733.77	6174.25	3742.45	3825.48	4387.58	4544.58	4175.2	3738.56	3655.78	4194.06	5269.87	5150.54	5564.25	4828.21
ARPC2	O15144	4833.41	5302.26	5909.22	5592.15	4268.93	4374.7	4441.31	4431.21	4654.99	4152.1	3871.26	4831.56	4693.61	4566.86	3841.66	4929.84
ARPC3	O15145	8843.98	7931.96	8821.56	8016.5	6118.39	5668.55	5168.26	5741.8	7283.03	6767.91	7617.02	6883.9	7964.33	7775.33	6538.48	6591.63
BET1	O15155	1321.16	1241.37	1470.41	1302	40.5141	968.975	700.556	1070.31	425.183	468.105	79.3078	306.862	618.425	442.225	524.699	412.523
POLR1C	O15160	3547.6	2505.19	2182.24	2444.94	2504.66	2563.12	2851.77	2549.78	3347.86	3352.73	3512.16	3240.69	1901.32	1826.98	1863.17	1691.53
TRIM24	O15164	531.692	294.089	424.568	324.513	435.103	515.826	790.391	552.757	526.315	546.921	496.137	563.053	901.885	971.511	1069.8	954.265
PGRMC2	O15173	3640.3	6109.44	7370.44	6039.98	6591.39	6259.59	5745.56	6997.36	1821.05	1536.32	1920.94	2080.21	3278.67	3911.77	4056.06	3860.94
CETN3	O15182	207.392	285.99	124.884	192.409	397.38	459.968	328.244	391.851	333.577	298.201	296.327	216.466	631.332	664.533	602.617	734.416
RGL2	O15211	165.982	58.1207	217.826	63.2608	186.309	290.948	148.872	197.084	72.902	97.0264	104.839	62.7995	310.103	355.22	440.164	379.899
PFDN6	O15212	1752.47	1363.86	1433.47	1502.44	1332.69	1704.38	1579.6	1340.3	1133.85	1152.87	1968.67	1269.44	1004.97	1268.12	1586.36	1516.4
WDR46	O15213	1907.09	1563.67	1374.62	1351.43	1175.83	1428.33	985.004	1202.53	1715.11	1786.34	1787.88	1716.25	1245.09	1400.48	1416.43	1244.94
NKRF	O15226	813.08	888.722	1037.72	889.41	829.357	913.204	883.213	985.221	1034.99	965.61	930.422	1071.94	737.205	736.049	777.453	788.167
GNPAT	O15228	881.146	869.144	1023.31	845.131	294.427	296.009	306.514	235.614	537.097	515.09	442.12	556.653	100.536	102.204	159.112	113.376
LAMA5	O15230	452.305	413.734	436.823	409.969	391.74	352.706	416.314	396.394	325.941	358.747	293.968	330.716	210.068	202.66	167.084	209.21
ZNF185	O15231	772.809	632.221	669.159	601.023	446.551	193.859	364.154	453.209	86.7426	75.3857	66.8876	148.375	1240.66	927.517	1344.53	1184.98
CASC3	O15234	594.317	81.7256	461.105	395.906	381.155	309.071	377.352	420.464	361.138	438.571	415.271	459.021	297.092	319.793	341.736	544.86
MRPS12	O15235	1411.94	1183.37	1386.67	1198.68	675.618	874.706	976.185	821.923	1011.28	1014.75	1067.1	1065.03	752.147	910.212	698.208	866.385
ACOX3	O15254	1059.03	825.892	904.7	819.204	486.107	868.973	528.375	429.241	573.093	487.852	435.67	490.615	1461.49	1735.1	1778.97	1356.84
RER1	O15258	1234.27	2743.22	3221.09	3025.65	2555.9	2457.41	2315.89	2552.6	1975.73	1778.5	1333.33	2081.21	2148.58	1712.83	1544.51	2080.15
SURF4	O15260	2109.9	3224.9	4830.76	3532.95	4055.84	3952.27	5299.97	5177.92	2710.65	2114.18	1924.21	3296.32	4095.05	3227.83	3590.85	4826.55
MAPK13	O15264	44.8929	794.43	118.54	123.717	106.065	1000.37	1627.4	1715.92	786.328	873.138	1137.41	1020.5	2096.32	2571.57	2715.27	2649.59
SPTLC1	O15269	1004.88	892.17	1014.44	820.297	766.865	715.169	780.028	922.511	1331.37	1303.57	1374.57	1365.11	1496.69	1493.38	1654.77	1407.49
SPTLC2	O15270	777.588	325.325	440.365	435.059	470.724	414.546	397.286	543.041	752.107	655.872	555.016	794.164	972.178	1089.54	1050.59	934.878
OGT	O15294	1343.1	1194.6	1092.71	1072.6	1321.21	1549.24	1361.24	1463.25	1188.46	1258.02	1173.39	1221.16	1562.03	1783.18	1518.93	1604.94
PPM1D	O15297	241.082	273.64	76.8309	161.939	313.834	163.42	339.448	278.618	291.3	166.224	120.577	303.566	757.01	685.231	1178.71	667.307
PMM2	O15305	5443.35	4158.67	3910.73	4229.5	2524.82	2360.8	2079.37	2452.99	1907.01	1672.28	1893.43	2026.78	2323.2	2199.08	2318.73	2323.33
TM9SF1	O15321	2996.7	2442.4	2970.4	2739.43	1926.08	2544.38	2054.54	1773.35	1548.48	1304.6	1507.92	1746.01	3445.08	3617.68	3576.12	3539.34
INPP4B	O15327	198.911	364.777	250.452	176.405	301.19	222.122	57.8072	326.8	101.818	162.313	136.611	119.349	1060.41	945.561	1198.19	1124.53
MID1	O15344	3862.92	3479.12	3524.41	3200.89	643.991	644.696	213.585	428.419	410.036	511.272	615.839	522.782	72.4105	886.185	49.6003	81.2664
HMGB3	O15347	18685.2	14916.7	12348	14847.5	4146.15	4280.59	4596.86	4469.14	4978.22	4868.65	4965.72	4959.09	10595.2	10174.5	10727.7	9691.71
PPM1G	O15355	5049.33	3494.77	3553.25	3505.6	3642.36	3608.14	3727.46	3814.47	5223.82	5472.24	5430.98	5441.8	6397.52	6442.13	6792.46	6375.41
INPPL1	O15357	1167.34	738.177	748.402	742.505	1715.01	1784.9	1839.19	1909.23	455.14	369.947	459.499	451.38	1148.69	997.283	1180.65	1135.42
EIF3D	O15371	3188.27	3067.33	2954.68	2983.92	2853.01	3146.17	2934.97	2783.45	3062.59	3433.45	3388.53	3137.82	3077.18	3107.69	3002.1	2663.63
EIF3H	O15372	9533.5	8146.83	10082.8	8752.12	7091.46	8133.12	8003.53	8696.66	9272.38	9036.75	8905.7	9142.42	8029.29	8026.81	6866.05	8224.29
HDAC3	O15379	465.37	241.333	343.369	101.289	445.084	363.223	372.503	386.251	381.277	381.556	359.848	402.599	410.228	457.873	438.956	361.139
NVL	O15381	284.046	269.241	205.896	288.203	601.294	422.49	620.958	530.848	317.203	355.804	317.905	356.483	1011.8	971.421	1015.76	929.683
BCAT2	O15382	3106.37	2895.8	3210.16	3030.53	1364.97	1375.05	1426.31	1497.59	2126.75	1985.01	1765.06	1994.4	1944.78	2223.59	2331.27	1979.41
IPO8	O15397	1348.5	681.405	529.07	549.732	1050.24	1192.48	1179.08	1004.52	422.28	449.123	396.809	392.535	447.183	370.824	341.357	459.195
STX7	O15400	2962.7	1907.82	2127.81	1732.93	1195.59	1347.01	1149.88	883.368	2324.02	2297.25	2434.93	2498.49	1438.39	1596.55	1818.04	1763.58
TOX3	O15405	362.259	375.968	428.748	471.368	499.252	454.977	462.534	468.361	426.659	386.709	374.263	438.07	562.887	502.277	463.459	747.594
TNRC18	O15417	51.0615	126.477	76.8012	33.366	160.622	118.892	82.8306	48.0852	83.734	71.1894	68.0392	103.785	83.2677	61.6077	87.0991	106.964
SLC16A3	O15427	609.286	1141.08	1612.71	1199.82	8202.58	7722.56	6590.63	8242.37	3720.93	2370.44	2054.12	4426.12	582.222	210.364	216.751	553.975
SLC31A1	O15431	110.26	68.7533	93.3991	348.641	829.17	975.298	512.132	519.768	622.993	661.323	531.01	560.007	619.624	619.003	610.897	458.401
ABCC3	O15438	2791.57	2608.88	2399.16	2450.07	687.891	622.177	634.375	664.945	153.035	192.054	124.185	106.112	311.331	430.7	170.876	470.826
ABCC4	O15439	1444.54	1245.24	1360.1	1254.34	374.911	439.277	500.459	458.253	409.812	452.877	410.796	420.254	142.481	252.733	246.998	283.189
POLR1G	O15446	1835.29	1063.36	1325.12	1098.76	1400.01	1255.4	1570.5	1359.59	1466.04	1542.18	1472.05	1424.63	848.156	858.499	953.502	850.831
P4HA2	O15460	783.519	670.305	667.897	522.12	1493.55	1227.4	707.878	892.617	992.475	786.358	843.871	1008.5	2413.64	1968.49	2009.32	2495.75
YKT6	O15498	2514.35	2991.94	3153.22	3302.49	2356.58	2228.93	2581.58	2258.8	2578.56	2389.53	2288.05	2599.48	1769.08	1593.57	1519.99	1792.51
NUP42	O15504	384.371	310.846	314.438	150.732	345.2	281.887	428.739	327.032	206.705	442.78	294.764	350.909	105.718	159.576	111.153	80.6143
ARPC5	O15511	11034.9	7758.32	8280.79	8640.6	6014.78	5550.62	5001.75	5456.26	6378.2	5522.94	6585.86	5928.96	4110.46	5416.56	5293.15	4751.43
MAFG	O15525	340.722	418.672	216.425	219.465	275.606	357.176	449.975	241.767	155.541	187.655	203.76	143.488	115.679	196.319	185.069	240.857
PDPK1	O15530	443.276	374.207	319.556	282.816	400.738	328.751	303.514	295.21	314.397	343.093	367.865	345.964	781.867	715.637	871.06	721.235
TAPBP	O15533	2389.99	1954.32	1817.03	1845.86	4944.41	4599.14	3990	5544.71	1481.76	1384.54	1437.17	1516.74	1137.82	1022.12	1218.16	1130.97
RNF113A	O15541	2395.89	2758.82	3400.44	3025.79	1343.58	3181.87	3379.2	3188.98	796.667	2414.23	2032.36	1678.09	2057.02	2198.87	2074.33	1222.05
CLDN3	O15551	274.807	157.639	128.801	141.553	69.5381	111.036	1321.13	158.82	2199.56	1659.67	1086.02	2596.45	1301.06	1563.23	1180.32	1836.82
KCNN4	O15554	103.904	485.003	257.205	92.8243	310.886	313.391	283.1	499.021	804.564	697.707	732.438	805.134	227.523	195.153	146.567	230.3
DHX15	O43143	10660	8103.45	8399.62	8571.31	10385.7	10139.2	10980.5	10771.5	16174.9	16262.7	17570.6	16827.8	11381.3	11227.3	11000.1	10594.8
RNMT	O43148	1709.85	1083.19	947.823	1295	967.206	806.199	792.695	1173.31	828.092	748.138	873.89	789.637	1371.57	1255.05	1497.01	1221.27
ZZEF1	O43149	568.982	472.333	547.409	498.12	464.433	555.5	379.841	564.767	436.238	472.634	502.154	479.091	668.02	722.923	629.694	632.484
TTI1	O43156	486.482	421.72	662.668	570.19	761.62	945.977	718.858	767.908	881.641	924.494	758.705	898.275	786.12	679.72	603.501	618.49
RRP8	O43159	1989.8	1413.38	2393.07	1766.46	1042.54	1218.63	985.562	1218.31	689.441	823.713	702.534	847.076	572.729	481.313	639.163	734.993
PJA2	O43164	47.2701	119.789	131.359	30.9709	92.4666	116.851	124	187.477	66.6217	40.4409	86.3647	48.5209	95.7059	34.1683	109.623	126.275
SIPA1L1	O43166	96.8883	119.387	127.39	147.785	128.263	122.243	99.4116	205.828	103.686	154.456	162.241	220.938	107.372	118.412	167.467	69.4795
CYB5B	O43169	945.28	1207.59	1889.27	1319.69	534.019	580.877	457.398	378.916	1416.99	858.95	965.198	1365.21	427.105	551.156	476.19	583.468
PRPF4	O43172	1017.87	1071.19	1139.09	1186.71	1390.11	1517.61	1625.75	1770.23	1889.71	1928.55	1843.92	1876.04	1918.22	1908.32	2117.46	1807.89
PHGDH	O43175	7927.14	5186.44	5820.44	4630.18	27913.2	30353.5	25222.9	24416.7	28639.3	36663.4	36099	30478.4	18299.2	20515.7	23881.2	23669.3
NDUFS4	O43181	1382.98	1266.03	1642.11	1290.87	696.011	540.213	637.004	682.148	588.389	734.048	496.894	546.484	715.669	763.738	714.305	620.134
DYNC1LI2	O43237	4896.8	3659.48	5005.94	4028.24	2303.17	2505.02	2516.87	2648.28	1736.76	1681.78	1603.85	1787.99	3176.41	2745.27	3199.68	3043.94
PSMD3	O43242	4668.6	6248.66	6369.87	6192.2	5580.29	5681.45	5893.63	5541.37	6305.3	6025.28	5979.18	6630.34	7396.65	7383.56	6747.96	7331.18
RBFOX2	O43251	375.146	241.516	300.448	272.152	395.436	337.59	641.44	306.37	304.026	314.105	250.413	304.514	139.35	191.643	211.576	212.457
PAPSS1	O43252	2181.08	1979.91	2128.55	2075.05	3439.78	3385.71	3419.4	3651.17	3420.02	3659.85	3138.9	3436.75	5028.6	4868.28	4709.4	4660.17
ZW10	O43264	930.928	554.605	681.145	667.269	704.28	798.914	748.964	784.449	1158.05	1146.51	1058.92	991.707	1016.65	947.283	1021.79	1033.9
SART1	O43290	1764.29	1683.46	1797.84	1786.13	1679.05	1785.29	1613.25	1714.6	2114.85	2164.84	1984.99	2305.39	2019.78	2000.95	2255.29	2274.48
SPINT2	O43291	1973.3	1167.23	1680.03	1228.58	50.6085	1717.16	168.334	222.377	2896.96	2102.51	2072.46	2718.15	2081.41	1948.63	2227.79	1888.9
GPAA1	O43292	2294.24	1730.06	1371.9	1562.81	2323.94	2682.48	2563.95	2631.88	1326.35	1254.76	1093.64	1166.76	1528.15	1586.21	1424.29	1397
HSPA12A	O43301	2138.13	766.835	1078.75	817.093	287.898	343.988	207.111	313.288	511.83	98.3208	53.9476	102.032	636.543	644.21	535.745	571.804
PPIP5K2	O43314	1011.31	723.321	805.648	728.981	648.357	747.771	827.602	694.339	755.758	799.461	766.049	887.382	689.297	644.341	583.743	758.625
MAP3K7	O43318	423.394	200.666	298.277	284.943	402.099	265.731	309.275	185.149	317.318	305.156	327.981	317.895	278.548	280.92	227.069	353.813
EEF1E1	O43324	2691.81	3658.67	4719.03	4082.67	3552.6	3244.76	3267.36	3444.08	2433.64	2423.16	2367.45	2407.65	3252.31	3589.66	3819.78	3727.78
RIPK2	O43353	1168.7	748.731	841.877	922.686	112.22	102.074	92.0644	1294.19	539.335	487.636	664.227	557.715	774.129	702.31	905.112	711.107
HNRNPR	O43390	13393.4	11105.9	16179.5	12583.8	20633.4	22441.9	24814.7	20183	19708.9	22594.5	18890.9	22033.7	16449.4	12058.5	17476.6	11694.8
PRPF3	O43395	1337.77	1021.52	1288.9	1104.36	1560.92	1614.45	1431.44	1639.94	1691.86	1610.26	1656.85	1594.68	1899.23	1762.45	1977.99	1809.55
TXNL1	O43396	13309.2	11374.2	11903.6	10402.4	9013.96	10393.8	9625.93	9953.6	6696.14	5884.41	6620.01	6385.85	14457.5	14659.4	15053	14371.3
TPD52L2	O43399	3312.03	2941.18	3384.55	3144.48	5025.72	5048.73	4747.14	4385.97	5214.24	5399.75	5663.6	5386.8	3727.12	4761.59	5349.17	4977.86
EMC8	O43402	2614.76	1700.58	1980.7	1789.37	1589.16	1468.77	1472.55	1672.64	1616.43	1720.01	1769.49	1646.73	1992.97	2649.09	2349.82	2862.72
ERI3	O43414	155.642	1058.35	1385.15	1339.91	1731.7	1823.08	1234.33	1517.2	858.928	747.989	109.919	1066.15	139.186	549.303	585.86	1200.98
FIBP	O43427	166.009	563.306	868.021	737.269	516.381	415.671	559.426	539.253	619.689	753.466	873.423	744.23	527.831	461.582	296.414	308.743
EIF4G3	O43432	2041.97	1257.23	1583	1293.57	1535.1	1950.15	1256.9	1444.25	1134.14	1040.03	1136.16	1156.4	1191.73	1471.62	1366.74	1347
PPIH	O43447	536.051	176	269.268	287.207	947.52	601.563	665.1	399.984	563.818	710.245	686.402	465.791	558.767	576.828	545.246	560.633
HTRA2	O43464	908.809	724.053	561.147	672.794	710.326	638.846	666.2	448.199	574.269	484.193	581.444	570.357	565.222	718.066	787.616	694.804
OIP5	O43482	83.9991	52.3314	103.025	102.448	165.469	149.758	152.82	181.84	350.235	261.628	224.808	345.478	190.91	162.3	185.702	140.597
AKR7A2	O43488	2185.37	1807.96	1858.22	1783.9	1985.43	1728.22	1601.28	1698.31	1570.23	1655.79	1589.16	1565.19	3694.21	3635.72	3579.5	3255.53
EPB41L2	O43491	1206.25	1094.66	1311.25	1113.96	3355.32	3559.35	3683.22	3290.68	7796.36	7862.07	7545.16	7777.48	2598.82	2721.52	2983.48	2932.17
TGOLN2	O43493	639.589	655.864	832.464	721.73	278.731	246.079	256.163	309.146	382.663	369.492	405.358	366.794	353.416	333.263	301.84	366.967
RAD51C	O43502	200.649	147.428	108.09	59.5065	203.191	186.707	321.571	167.062	237.714	279.292	287.384	272.586	390.073	466.8	400.994	330.115
B4GAT1	O43505	778.854	497.059	628.685	658.293	598.465	893.626	593.543	524.176	207.488	104.867	199.178	211.893	430.154	555.613	516.142	308.263
WIPF1	O43516	2323.34	1082.45	1451.09	1485.83	1249.71	1136.68	1017.08	1329.7	82.0828	87.2055	197.424	99.1596	1997.87	2077.8	2382.09	2330.98
XRCC3	O43542	84.6517	49.333	172.434	105.539	140.531	166.137	369.195	86.1636	369.409	295.351	310.227	283.17	557.46	408.368	283.931	619.805
CA12	O43570	25043.9	20911.2	18943	20053.1	285.461	76.4813	305.864	334.901	734.791	733.012	678.027	688.136	560.706	658.756	801.8	709.644
AKAP10	O43572	499.265	454.064	965.041	342.249	332.374	88.9643	282.029	149.974	165.69	162.653	196.653	299.04	331.305	313.713	439.158	250.177
DENR	O43583	7035.15	6555.37	7473.67	6240.59	3584.29	3704.13	3361.33	3655.93	5216.48	5060.74	5530.12	5143.65	7525.39	6704.24	7287.07	7354.27
XPOT	O43592	1118.59	1396.14	1564.74	1376.78	1475.33	1843.89	1647.8	1535.25	985.906	789.513	904.97	1046.56	3866.73	3445.43	3309.44	3794.59
DNPH1	O43598	4896.58	4328.32	4967.05	5157.06	3947.58	3698.83	2888.7	3002.53	1393.89	1622.03	1647.31	1414.06	3318.69	4564.57	5672.48	5332.69
TIMM44	O43615	2301.6	2188.1	2307.97	2087.1	2147.03	2523.29	2573.69	2055.27	4802.83	4835.64	4678.31	4786.16	2160.62	2003.31	1988.11	1968.25
TRAPPC3	O43617	2467.45	1933.57	2090.52	2083.24	2033.32	1648.9	1850.35	2180.55	2191.77	2090.94	1944.54	1937.79	2747.49	3165.32	3171.33	3080.16
CHMP2A	O43633	2931.12	2476.99	2496.39	2531.4	1319.07	1513.89	1599.3	1654.84	901.016	917.952	965.906	843.155	1001.71	1030.22	1137.61	936.366
NCK2	O43639	754.409	530.344	587.002	578.304	66.9888	382.88	194.14	174.468	746.971	804.219	707.777	925.388	384.562	393.328	452.883	398.276
PLRG1	O43660	1418.29	926.498	1078.19	854.731	1223.58	1191.84	1019.62	1116.67	1001.39	1037.67	1044.98	969.284	861.993	776.366	926.717	714.429
PRC1	O43663	141.92	747.59	150.66	561.465	1863.35	1919.66	2132.2	1944.65	3727.12	3905.05	3509.72	3428.11	1493.82	1425.43	1318.6	1669.1
RGS10	O43665	605.83	539.293	604.396	574.399	248.476	57.3184	349.875	157.778	509.537	574.755	529.229	557.763	486.156	367.942	324.761	348.852
ZNF207	O43670	2460.46	2120.96	2501.39	2102.98	2829.48	3178.72	3227.78	2603	2580.13	2882.22	2459.14	2841.01	1399.6	1471.89	1664	1249.99
NDUFB5	O43674	1551.28	2161.99	2805.02	2546.21	1897.18	1802.68	2343.2	2479.92	1954.75	2035.28	2218.17	2324.27	1839.97	1836.33	1407	1566.27
NDUFB3	O43676	2975.64	2567.49	2126.95	2686.08	1185.85	1408.57	1006.63	1279.37	1521.25	1396.37	1615.87	1539.7	1655.49	1517.35	1378.17	1548.46
NDUFA2	O43678	897.898	520.819	493.82	390.749	457.108	376.538	63.5001	272.173	368.284	311.158	520.97	310.933	504.496	434.771	628.091	646.677
GET3	O43681	3135.85	3561.85	3804.16	3823.18	3474.39	3454.3	3814.07	4405.92	4310.99	4216.7	4381.85	4210.92	5967.93	6682.5	6522.22	6265.59
BUB3	O43684	6227.91	5414.98	6611.57	6067.69	8506.01	9515.83	10053.1	9038.32	8693.61	8577.48	8938.59	8522.91	6592.35	6494.12	6711.26	6378.96
PLPP2	O43688	1339.28	1397.41	1669.91	1321.86	1433.08	1724.91	237.983	1784.22	3990.79	3757.7	3197.99	4831.77	1192.52	1424.07	978.26	1296.21
ACTN4	O43707	24702.1	31479.5	33215.2	31524.8	17876.5	16635.2	18468.4	20154.7	23570.8	20884.1	22573.4	23847.6	11718.5	11931.2	11263.6	11623.1
GSTZ1	O43708	2072.18	1740.74	1595.1	1578.31	759.192	759.169	812.647	616.703	961.934	959.351	1145.57	1044.15	5414.39	5326.88	5612.37	5114.62
BUD23	O43709	713.794	740.568	731.104	731.748	2144.73	2244.57	2509.36	2246.1	2311.63	2986.57	2536.23	2439.93	1030.58	1092.65	1001.04	1042.1
HTATSF1	O43719	1226.65	1271.82	1770.93	1527.66	1322.58	1406.29	1569.44	1478.45	1060.12	1068.5	1063.97	1072.29	1433.52	1537.67	1439.87	1520.4
AP1G1	O43747	2144.4	2219.49	2652.36	2392.21	1378.51	1512.22	1525.41	1475.71	2026.75	2129.68	1697.3	2109.38	3831.35	3709.86	3770.34	3937.51
STX6	O43752	629.183	365.548	441.395	350.816	557.659	846.476	605.768	585.884	490.359	531.66	516.213	455.718	972.47	916.054	1170.77	946.104
SYNGR2	O43760	1337.56	2145.11	1971.08	1923.41	1132.84	1285.29	706.189	1057.02	883.499	977.75	822.689	1300.85	2830.44	2664.73	2245.82	2487.14
SGTA	O43765	706.906	485.715	803.143	515.785	756.159	568.486	663.361	556.743	1555.45	1544.29	1768.78	1534.78	299.172	770.659	746.342	697.584
ENSA	O43768	1235.43	1285.2	1501.95	1499.97	1942.94	1911.06	2060.82	1850.55	1608.32	1685.2	1631.65	1666.85	2765.51	2458.66	2526.95	2769.26
SLC25A20	O43772	1731.45	1698.8	1790.96	1588.79	1860.78	2275.69	2054.96	2461.1	1876.31	1611.51	1362.62	1831.76	704.85	655.432	987.624	644.042
NARS1	O43776	10507.5	10603.2	10607.8	10285.7	7447.1	8112.99	7795.73	7737.67	7050.63	6691.75	6690.1	6777.98	6238.39	6328.68	6302.36	5951.8
MYO1B	O43795	6613.01	5404.44	5841	5451.8	1345.73	1437.67	1424.66	1198.32	1855.38	1877.74	1839.31	1930.67	2672.05	2676.8	2710.13	2806.96
SLC25A17	O43808	154.271	64.3283	115.048	103.398	273.39	110.61	136.009	96.1061	108.173	94.0837	120.049	151.58	101.076	174.578	121.894	234.483
NUDT21	O43809	3603.27	2871.86	4006.47	3391.27	4182.13	3823.61	3615.2	3018.78	3610.12	3936.95	4927.03	3851.6	4060.49	3816.07	3011.35	3319.66
LANCL1	O43813	17412.3	18687.6	15825.5	17069.5	13133.3	14258.5	13805.5	12988.1	3182.19	3005.92	2694.91	2990.61	5616.83	5800.44	6567.21	5593.78
STRN	O43815	1356.39	1223.15	1336.23	1236.85	865.234	1006.85	892.081	729.031	831.53	815.51	853.766	1050.03	1336.9	1279.99	1376.19	1371.6
RRP9	O43818	1637.43	2100.5	2018.72	1784.35	1762.26	1893.16	2316.92	1841.66	2502.86	2152.97	2311.18	2665.49	1150.02	1261.63	1158.35	1322.13
SCO2	O43819	455.28	348.222	600.723	501.717	531.003	531.873	480.821	406.899	440.958	448.038	406.906	566.375	228.102	249.646	272.339	332.908
AKAP8	O43823	1625.72	1047.63	1351.75	1010.26	860.115	1072.79	904.031	1001.58	1595.25	1568.85	1369.26	1531.25	1036.29	1018.52	1135.16	1116.16
GTPBP6	O43824	496.854	333.75	346.563	277.724	361.381	498.283	391.425	257.353	283.922	268.425	309.722	292.919	434.456	485.012	475.285	557.232
SLC37A4	O43826	436.306	757.074	960.617	867.65	485.827	421.034	905.585	583.281	616.068	668.381	631.028	1059.77	1412.88	1535.05	1439.4	1548.32
IDH3B	O43837	2925.98	3152.45	3233.39	3390.66	2085.06	2051.06	2583.73	1972.41	3658.98	3290.6	3611.62	3451.77	2102.8	2380.57	1965.31	2045.26
NRDC	O43847	1199.94	1178.52	1422.74	1351.82	1964.25	1975.83	2282.79	1991.51	1662.75	1725.6	1377.63	1806.23	1742.74	1697.66	1678.34	1660.14
CALU	O43852	9373.25	12353	15444.4	13949.9	13240.8	11793.4	11265.5	13122.4	7250.04	6329.3	5407.43	7442.37	3207.05	5226.13	5241.3	5903.83
AHCYL1	O43865	4447.33	3460.72	3411.51	3457.72	5221.85	5476.52	5366.1	5186.28	3736.55	3794.1	3614.77	3654.77	3921.8	3475.55	4417.79	3698.92
KIF1C	O43896	350.724	318.929	466.673	304.703	404.898	304.262	258.91	330.701	364.206	297.585	368.722	368.198	563.683	524.697	434.501	497.755
ORC5	O43913	259.268	264.277	290.599	358.728	429.177	512.18	566.685	494.802	255.472	310.076	250.456	301.163	452.563	476.815	455.141	466.152
NDUFS5	O43920	4003.51	3761.09	4642.74	4363.41	1877.71	1566.74	2034.88	1813.16	2467.64	2013.68	1749.42	2473.08	2329.48	2450.31	2047.77	2518.52
PDE6D	O43924	673.178	769.94	419.875	646.277	715.881	709.818	570.38	493.563	912.526	961.955	989.347	815.314	763.94	747.019	966.9	877.685
ORC4	O43929	619.143	290.994	326.989	282.738	346.151	301.227	397.299	416.508	222.699	257.9	230.881	329.685	361.759	292.114	316.247	411.199
RAD21	O60216	934.472	710.104	776.657	770.099	1355.39	1316	1192.94	1093.88	906.579	907.876	851.935	859.622	1130.62	1146.68	1482.19	1102.69
AKR1B10	O60218	309793	272552	263192	259534	893.808	1365.67	644.836	496.255	694.696	425.271	598.091	472.686	168.3	63.6956	513.937	114.33
KALRN	O60229	49.6591	187.91	245.816	113.927	129.541	138.994	229.879	273.743	343.995	281.936	221.885	521.267	296.86	263.079	213.913	260.582
DHX16	O60231	936.023	618.023	646.013	564.12	871.472	883.048	892.191	886.796	850.761	797.672	776.555	817.325	1156.35	1292.66	1254.81	1253.59
BNIP3L	O60238	1769.9	1912.64	1782.5	1439.16	1301.03	1545.51	768.822	1048.97	1240.92	831.351	60.8687	1314.67	2618.44	2571.49	3790.54	3925.36
MED14	O60244	497.415	401.826	340.314	377.909	400.173	335.016	429.632	378.227	444.637	383.307	486.791	520.704	488.189	530.65	502.676	540.005
PRPSAP2	O60256	2556.08	3061.28	3177.77	3127.62	3212.6	3055.9	3078.68	3010.7	4986.73	4720.04	4778.71	4749.36	3265.69	3249.34	3327.31	3414.57
SMARCA5	O60264	2840.3	2277.61	2845.42	2625.98	3393.9	3449.02	3371.94	3686.23	4314.97	4206.85	4434.33	4308.94	4204.68	4230.37	4188.97	4288.38
SPAG9	O60271	1492.38	1417.53	1505.82	1499.92	1413.11	1203.18	1243.28	1353.48	1227.29	1056.84	1170.35	1288.25	1486.87	1430.2	1386.83	1468.87
ZNF292	O60281	145.521	255.191	9.62051	20.3165	99.9078	161.355	95.1966	14.2061	269.013	195.475	249.093	134.386	416.143	419.876	354.515	423.449
URB1	O60287	241.648	198.426	262.841	225.278	272.314	295.894	262.732	331.691	413.339	396.948	347.226	419.622	252.664	214.591	195.621	209.188
SIPA1L3	O60292	1165.82	666.496	1182.72	883.673	391.892	697.518	542.307	401.115	304.223	228.024	343.267	298.71	299.809	386.116	443.103	331.553
LCMT2	O60294	107.812	138.529	116.898	225.412	746.266	890.095	713.326	819.595	174.915	190.611	281.822	210.614	204.838	203.596	239.631	243.797
AQR	O60306	1847.25	1644.91	1950.69	1864.54	2725.57	3263	3052.65	2872.98	2593.64	2771.85	2816.42	2678.5	2089.39	2336.92	1954.92	2316.7
OPA1	O60313	1886.13	1413.93	1615.48	1652.27	1754.96	1743.71	1593.53	1632.31	2330.41	2148.97	2114.5	2369.75	2119.86	2353.61	2090.74	2315.31
MCM3AP	O60318	959.226	636.29	881.587	850.723	1476.07	868.694	514.341	1078.13	603.606	654.901	661.712	456.896	774.982	697.053	884.786	821.536
KIF1B	O60333	394.375	264.216	294.702	311.755	255.057	297.797	310.824	291.75	356.527	322.48	344.005	405.607	269.193	213.282	253.335	208.76
KDM1A	O60341	1447.83	1098.92	1312.4	1267.88	1759.15	1407.65	1548.45	1544.76	2025.86	1950.04	1881.97	2074.28	3769.63	3935.45	3633.18	3624.98
TBC1D4	O60343	591.323	379.139	419.748	465.369	876.923	939.763	1106.2	844.235	699.688	574.556	748.364	682.065	437.099	385.954	414.795	457.395
FADS1	O60427	1106.08	1040.63	1118.63	848.754	2376.79	2175.65	1741.26	2151.3	302.369	267.831	342.304	447.067	860.643	879.347	698.573	968.46
PPL	O60437	882.684	710.52	769.055	607.513	1388.51	1323.84	1277.2	1455.95	164.583	206.772	277.084	352.517	1067.25	933.503	1138	1086.74
MAN1A2	O60476	207.694	319.983	380.48	384.241	435.222	256.914	393.411	330.933	378.902	426.182	363.335	499.735	712.869	593.229	653.55	684.249
ACSL4	O60488	476.575	406.037	421.827	437.547	818.765	868.01	1087.1	1083.09	4063.5	3375.55	3685.69	4002.9	104.701	73.2319	79.5544	90.1304
SNX3	O60493	5589.58	5384.39	6022.25	5222.36	4146.45	3841.17	3950.29	4439.31	6171.65	5729.53	6395.01	5798.25	5084.12	5513.48	5658.56	5172.26
STX10	O60499	377.821	453.465	361.947	560.57	429.236	951.361	640.585	747.706	522.677	572.413	439.112	572.111	318.38	382.075	366.592	314.735
OGA	O60502	1535.89	1263.15	1261.04	1390.74	1971.18	1929.05	1970.98	1790.77	1155.36	1029.48	1001.11	1294.84	2728.88	2529.67	2812.2	2385.94
SORBS3	O60504	627.587	740.329	684.405	800.664	696.784	786.29	648.664	637.098	130.343	203.525	223.734	240.082	343.212	491.799	492.771	440.217
SYNCRIP	O60506	4671.79	4127.85	5308.19	4215.44	5876.09	5888.68	6511.99	5911.62	4865.27	4669.14	4640.15	5061.33	7969.45	7138.54	7178.71	7719.96
CDC40	O60508	326.367	390.533	274.481	275.094	351.72	547.269	396.338	365.327	637.735	683.225	668.252	612.704	586.854	607.743	615.679	514.177
RANBP6	O60518	1546.66	1817.32	1845.76	1943.45	3562.22	3201.31	3558.81	3480.57	3273.53	2387.09	3223.28	3170.48	1617.2	1612.81	1152.27	1606.17
NEMF	O60524	1101.03	926.065	1054.7	1029.7	690.263	801.172	727.076	860.605	774.891	954.548	776.003	871.159	912.181	961.826	872.474	941.376
GMDS	O60547	3002.06	3705.14	3329.53	3871.71	1520.04	1835.05	1789.51	1999.44	4570.52	4745.62	4646.95	4443.95	1863.01	1707.53	1983.82	1912.06
NMT2	O60551	263.791	189.651	271.662	171.525	158.879	90.2422	140.276	74.2005	117.483	206.791	193.119	151.401	385.986	342.757	364.639	344.3
CCNT1	O60563	655.718	603.918	797.859	735.96	786.385	744.894	510.079	812.334	690.772	831.267	716.715	718.26	800.307	697.565	876.463	713.177
BUB1B	O60566	251.565	80.6096	90.0428	198.565	341.972	386.03	405.872	308.417	328.349	302.714	299.702	331.674	116.913	151.314	154.222	335.518
PLOD3	O60568	2649.97	1736.77	1748.18	1815.68	4303.15	3992.22	4350.81	4477.04	2157.94	2071.68	2130.58	2361.48	2649.16	2301.32	2287.85	2443.47
EIF4E2	O60573	1688.49	1208.78	2128.3	1767.84	1605.01	1667.16	1905.67	1841.05	1433.64	1574.11	1460.15	1446.17	1581.45	1404.17	1566.82	1590.61
DIAPH1	O60610	3242.9	2839.2	2675.03	2742.63	3553.92	3626.61	3882.16	3564.19	5544.81	5085.98	4989.06	4889.1	5961.66	5744.41	4988.76	5612.33
TSPAN3	O60637	1047.52	1668.15	1509.27	1796.07	1719.4	1624.34	2246.07	2442.93	4080.63	3389.91	3689.33	4305.63	922.478	128.393	2731.93	120.921
EXOC3	O60645	1389.48	1019.64	1302.31	1153.79	858.078	986.002	827.664	822.12	409.619	438.018	306.19	522.621	995.296	906.532	816.634	1009.48
PDE8A	O60658	395.41	281.465	529.674	501.35	262.61	125.672	289.541	372.739	451.081	240.239	306.189	409.079	122.18	58.0879	111.931	237.326
PLIN3	O60664	7110.51	5680.63	5915.89	5860.2	4417.81	4155.21	4822.87	5199.74	2218.99	2197.21	2290.09	2405.1	3898.64	4575.64	5705.31	5075.82
SLC16A7	O60669	145.511	52.9161	240.136	118.872	540.643	599.879	579.193	681.319	117.702	49.5358	80.6682	148.067	161.104	261.789	160.185	99.3175
RAD1	O60671	228.608	339.098	453.946	389.123	861.385	979.015	786.152	688.284	602.538	402.403	359.451	366.708	569.04	374.13	389.271	632.441
MAFK	O60675	97.7056	495.49	274.762	406.129	331.954	295.748	79.1224	85.1394	271.758	236.225	166.308	225.033	237.106	212.203	57.6062	284.33
PRMT3	O60678	1481.47	1111.27	1109.65	976.684	1042.39	993.745	1196.99	1179.04	1179.58	1020.82	839.485	1021.46	1213.5	1191.84	1244.84	1375.14
PEX10	O60683	104.115	583.688	204.21	83.519	124.295	192.378	525.719	211.627	52.5744	146.813	149.688	238.322	184.918	78.9926	393.314	265.264
KPNA6	O60684	1258.88	884.127	910.737	794.719	1480.37	1558.24	1326.99	1200.28	1224.61	1192.65	1194.62	1140.98	1560.8	1649.92	1961.81	1531.03
UGDH	O60701	152706	134095	138274	129912	6897.5	7860.37	10069.5	8885.51	16451.1	12898.6	17007.2	16186.7	9598.19	8169.96	7865.56	8657.15
CTNND1	O60716	8432.84	5881.23	7022.39	6638.93	1913.05	1905.87	1893.06	1849.25	5017.13	5007.56	4857.19	5140.52	2925.41	3272.15	3514.29	2810.72
ICMT	O60725	649.453	667.19	1008.6	757.293	1712.39	2020.88	1690.13	1462.78	1042.64	1006.99	783.48	1118.77	806.352	840.946	592.607	844.867
EIF1B	O60739	94.613	755.788	601.333	593.781	1039.6	114.154	932.954	1107.14	811.766	950.726	864.998	872.085	575.212	413.086	523.404	557.326
SNX2	O60749	3239.01	2586.34	2876.4	2528.65	1591.12	1543.66	1709.29	1690.21	3193.97	3101.79	3131.27	2968.08	2728.44	2852.61	2709.04	2559.09
DPM1	O60762	2165.14	1542.52	1896.96	1805.42	3190.54	3495.63	3028.49	3302.81	1945.21	1856.11	1804.35	2219.9	5050.92	4465.3	3849.66	4593.67
USO1	O60763	5646.97	4683.29	4553.04	4717.48	2814	2894.6	2519.76	2905.32	3894.27	3565.31	3439.16	3853.33	3298.29	2967.31	3305.71	3126.73
MRPS14	O60783	673.535	849.065	712.981	814.275	366.61	371.263	389.999	392.376	671.82	735.047	613.624	597.74	484.793	532.138	384.083	351.336
TOM1	O60784	1489.25	1190.36	1182.5	1196.13	576.108	611.204	639.566	771.624	275.665	290.341	224.177	345.311	446.547	581.874	590.143	509.208
HNRNPCL1	O60812	143.343	321.552	2030.71	617.185	66.2244	839.762	1269.43	1421.03	104.208	190.721	465.996	1539.96	441.146	89.1085	62.2189	2172.92
H2BC12	O60814	271355	212629	224590	206408	227120	275628	296466	352443	199265	146135	227626	210557	265824	251691	282276	301467
PFKFB2	O60825	782.505	479.382	597.472	422.824	578.087	801.305	980.503	609.389	1692.53	1570.07	1773.89	1918.15	497.006	373.126	399.618	477.523
CCDC22	O60826	2068.99	1306.08	1662.2	1487.66	1033.27	1183.63	1003.67	1182.42	648.403	652.245	800.199	730.119	1364.01	1354.72	1280.94	1309.55
PQBP1	O60828	5040.52	4293.88	4249.6	4336.33	5198.3	5746.05	6345.79	5963.75	6015.65	6742.47	6745.06	5983.04	5000.76	4742.12	5107.33	4292.62
TIMM17B	O60830	195.452	552.117	657.553	528.211	548.796	411.095	556.761	626.922	374.061	339.716	330.381	414.462	314.202	538.732	506.774	500.117
PRAF2	O60831	2522.88	1487.87	1567.44	1664.06	2404.42	2211.78	2125.01	2319.8	454.603	513.421	355.476	530.285	1248.39	1149.12	1438.01	1166.74
DKC1	O60832	3776.72	2879.42	3525.03	3182.15	3181.58	3237.86	3276.48	3397.97	3339.54	3257.25	3006.95	3362.22	2715.58	2366.27	2696.73	2483.12
EIF5B	O60841	5430.27	4277.59	4757.8	4628.95	3657.53	3418.68	3393.59	3410.47	2916.51	2767.27	2845.67	2744.02	4410.14	4492.85	4129.51	4475.54
EDF1	O60869	11644	8168.87	10218.9	8428.29	15089.7	16427.9	16414.8	17383.2	8941.8	9284.66	9707.76	9786.4	13359.6	11636.7	11438.2	11332.9
KIN	O60870	481.066	263.954	345.774	296.272	141.833	178.375	222.552	239.332	194.016	263.167	155.444	287.476	268.936	371.228	274.588	434.596
DIAPH2	O60879	954.607	460.271	599.826	603.891	378.612	396.97	387.093	374.476	244.113	260.421	356.325	341.055	181.479	147.841	137.668	133.642
DNAJA2	O60884	4007.3	3118.35	3160.51	2820.11	1514.3	1936.33	1599.87	1624.4	3717.16	3300.97	2713.15	3470.86	3178.88	3865.91	2591.12	3760.96
BRD4	O60885	1111.23	896.955	1102.16	1028.15	904.75	1025.74	997.913	910.469	1262.3	1175.66	1226.59	1254.06	963.96	926.091	934.664	889.007
CUTA	O60888	3099.11	1455.23	1617.98	2297.04	3447.82	3360.7	2826.55	2899.67	530.972	636.906	941.825	750.267	367.128	1227.56	1753.86	1623.69
SMPD2	O60906	278.932	110.554	102.052	165.649	174.132	157.293	80.2509	81.2606	161.906	211.611	90.196	129.225	80.9083	177.35	155.453	216.458
TBL1X	O60907	666.677	717.297	857.794	794.097	988.703	1254.64	1188.68	1110.5	982.203	1007.39	693.105	882.087	1053.49	1223.39	1087.17	1132.27
HUS1	O60921	777.985	95.0072	187.588	202.194	432.825	357.903	418.062	310.409	278.485	229.165	201.152	260.286	135.668	214.164	227.777	190.978
PFDN1	O60925	1666.43	1121.8	1075.1	1058.19	1997.38	1215.03	1105.53	1007.18	1033.36	1542.55	2073.38	1392.48	775.828	1557.22	1687.12	1211.2
PPP1R11	O60927	2653.06	1202.65	1015.12	1209.87	920.966	866.338	925.002	765.633	496.775	613.779	414.258	476.579	1690.04	1553.25	1936.45	1327.69
RNASEH1	O60930	1326.55	1009.54	68.9074	884.801	744.188	1320.21	743.965	516.555	839.21	886.131	940.731	783.539	1355.36	853.081	1113.08	630.769
NBN	O60934	4598.94	3038.88	2954.42	2999.54	2042.07	1881.96	2203.39	2041.97	1708.84	1742.46	1767.02	1579.99	2246.48	2156.68	2379.23	2235.22
RNGTT	O60942	365.42	428.595	340.372	406.815	439.71	424.67	422.535	447.943	459.196	467.525	523.926	489.131	628.804	729.462	740.621	568.198
ABCB7	O75027	895.456	629.365	760.849	731.793	1277.03	1473.5	1332.21	1354.49	1065.26	988.663	1091.82	1109.8	662.146	595.247	652.107	639.323
SRGAP2	O75044	224.86	239.507	436.281	413.749	471.107	462.129	560.807	379.472	308.279	366.962	359.09	367.422	552.638	485.225	534.061	651.104
IGSF3	O75054	504.057	447.851	530.234	402.973	367.354	393.661	480.616	485.139	331.321	287.038	281.001	378.474	2010.57	1930.09	1482.26	1723.66
FAM20B	O75063	1470.95	1225.53	998.626	1192.55	943.146	1134.51	1065.72	1430.07	615.139	452.109	438.601	565.073	1110.63	1113.48	1155.63	1104.02
WDR1	O75083	18687.7	19161.7	19764.9	17507	13959.3	13753	13843	15449.1	18129.9	17060.9	18057.7	18231.5	14030.6	13526.2	14229.7	13074.5
ATP9A	O75110	1219.01	935.404	846.953	1020.89	726.236	736.281	473.173	710.909	407.903	294.883	180.768	429.537	1336.49	1380.78	1420.51	1221.8
ROCK2	O75116	2070.37	1588.49	1857.31	1722.93	1652.63	1755.32	1568.94	1846.1	1126.83	972.702	1098.92	1170.81	1514.75	1356.22	1341.42	1329.87
CLASP2	O75122	636.91	483.921	584.433	613.198	595.983	512.949	532.178	710.527	635.223	694.465	659.974	604.424	440.135	455.943	536.814	483.532
PTCD1	O75127	75.3651	310.874	174.047	289.01	221.451	212.666	289.429	218.544	346.718	321.129	352.963	303.13	242.384	224.678	198.09	267.388
COBL	O75128	408.314	148.982	138.384	188.259	443.768	611.962	506.601	457.479	70.4174	82.3627	70.1563	100.499	64.933	114.398	45.5973	57.6154
CPNE3	O75131	5131.15	5018.71	4567.09	4724.07	3191.52	3299.99	3081.57	3551.39	4071.6	4151.28	4240.51	4347.2	15550.1	16655.5	17618.1	15830.2
ATG13	O75143	182.919	111.326	303.27	170.751	251.985	292.387	306.919	59.5799	209.602	204.817	187.401	182.93	226.241	237.722	301.616	268.689
HIP1R	O75146	457.944	259.242	374.385	284.157	245.364	262.867	204.926	288.217	847.524	891.111	971.75	861.169	1076.95	1039.5	1093.61	1091.19
OBSL1	O75147	298.252	308.43	261.791	279.955	228.24	280.065	72.6571	194.878	36.667	68.4144	60.1227	123.671	307.94	302.942	449.436	253.87
RNF40	O75150	812.008	730.3	832.26	743.941	960.763	972.234	1069.29	1027.41	1062.33	1135.32	1050.79	1188.01	1003.88	954.578	932.503	1015.39
PHF2	O75151	385.049	83.5214	460.17	343.819	287.742	214.61	281.784	310.207	356.143	388.43	468.69	462.598	826.671	791.636	802.862	833.537
ZC3H11A	O75152	421.565	350.26	498.344	397.526	585.84	610.598	794.956	626.716	995.524	958.668	900.127	925.934	481.407	420.634	536.107	459.778
CLUH	O75153	3084.42	2686.95	2885	2818.77	2386.02	2369.57	2562.94	2324.51	2770.35	3039.1	2739.69	2918.18	3588.45	3645.04	3239.99	3559.37
DNAJC13	O75165	991.794	736.962	957.326	946.932	1025.39	935.226	898.951	1006.23	1025.9	1024.27	922.684	1051.92	1290.61	1277.59	1147.67	1222.74
PHACTR2	O75167	58.756	74.858	317.459	308.424	136.089	238.21	781.679	75.8147	153.439	207.019	206.524	209.367	305.137	212.117	155.732	257.569
PPP6R2	O75170	334.324	275.206	205.027	97.726	283.737	499.818	455.723	73.2793	289.367	235.692	124.914	385.145	390.051	595.363	604.788	494.471
CNOT3	O75175	1070.88	917.349	1129.34	1117.73	826.184	741.118	936.353	780.074	1264.92	1220.2	1128.34	1196.72	1051.08	1148.41	1109.77	917.699
ANKRD17	O75179	425.773	311.678	296.064	207.788	505.98	556.232	396.356	338.983	287.991	328.552	341.671	314.987	352.102	352.495	405.454	338.303
DNAJB6	O75190	250.577	245.954	269.689	417.385	105.422	253.991	221.463	71.2965	174.796	285.668	85.9699	144.344	319.041	367.06	530.622	425.761
XYLB	O75191	1463.98	1036.32	1003.81	1064.71	499.482	202.78	612.36	406.556	447.04	470.528	372.13	474.304	275.827	305.789	421.258	334.234
COQ9	O75208	2909.27	2601.55	2617.96	2856.62	1342.93	1182.03	1290.75	1227.99	1948.14	1920.22	1951.01	1820.35	855.463	1192.44	1087	1090.41
GGCT	O75223	2253.99	2242.42	2779.77	1989.32	2554.34	3271.78	3099.91	2965.57	2098.63	2426.5	2845.07	2577.57	5547.71	5672.55	6714.56	5965.89
NDUFS7	O75251	4053.52	2555.88	2028.05	2374.9	1325.57	1463.83	1598.19	1387.21	2195.38	1997.32	2101.03	1972.25	1629.69	1781.4	1761.18	1507.17
NDUFS2	O75306	1616.81	1895.52	1881.81	1930.89	971.079	911.382	1137.08	1074.41	1458.64	1399.05	1346.69	1400.74	1079.53	1114.18	1112.97	1068.58
ZPR1	O75312	956.229	677.255	839.84	782.309	631.97	747.806	720.093	657.044	1080.23	1261.75	1299.02	1131.51	855.044	1443.96	1323.91	1507.43
DUSP11	O75319	198.477	276.578	382.269	338.466	145.899	148.607	424.622	105.255	391.027	380.069	253.209	341.029	122.741	461.681	319.318	124.346
NIPSNAP2	O75323	4787.05	3548	3649.13	4354.76	2285.7	2369.3	2309.55	1734.83	2898.21	2579.71	2573.72	3039.86	1580.18	1688.07	2149.02	2142.85
HMMR	O75330	641.985	524.203	597.113	677.495	966.133	916.925	1517.86	1290.42	2383.74	2322.87	2592.75	2259.76	1490.42	1415.16	1724.95	2042.48
PDCD6	O75340	992.163	528.957	876.46	786.758	3295.35	2417.56	2098.95	1795.87	534.17	513.727	757.743	641.973	1703.98	2081.68	1798.88	1325.17
ALOX12B	O75342	555.105	836.383	625.79	246.455	698.848	977.065	710.035	735.282	348.4	314.241	539.769	474.979	361.489	742.397	420.56	677.124
TBCA	O75347	10882.2	10672.8	11419.8	10396.7	12710	11792.9	13470.2	12525.9	12298.3	12392.5	13155	11544.4	13340.8	17887.7	18368.7	18930.7
ATP6V1G1	O75348	2416.32	1904.81	1926.06	1961.14	2101.87	1916	2641.41	2198.61	2614.35	2562.03	2678.12	2614.94	1443.75	1349.17	1663.89	1635.57
VPS4B	O75351	3798.03	3171.61	3559.77	3370.9	3836.34	4002.19	3999.59	4157.8	2773.38	2433.66	2638.81	2780.98	3696.05	3359.82	3347.47	3513.95
MPDU1	O75352	6203.11	4200.95	3837	3502.04	2990.57	3858.08	3043.72	3993.32	2697.22	1954.89	2055.65	2624.11	2591.13	3125.74	2768.51	3351.09
ZNF217	O75362	129.87	242.196	253.998	109.439	158.803	345.721	312.026	182.441	161.812	223.951	125.058	303.447	890.729	567.921	696.859	767.292
MACROH2A1	O75367	6087.57	6158.43	5539.58	5308.42	5241.46	8235.03	6302.65	9198.61	5538.82	3064.75	5593.6	4740.99	6746.46	5747.65	7116.57	8263.96
SH3BGRL	O75368	1460.66	497.029	785.28	722.189	1387.97	874.924	860.015	687.274	88.5249	103.292	85.7727	98.6552	1114.53	1802.28	1644.52	1863.07
FLNB	O75369	18184	20072	20168.7	19382.3	10216.9	9870.53	13547.6	13702.1	18062.9	15270.5	14909.5	18415.5	9871.64	10752.3	10371.1	10244.9
NCOR1	O75376	448.75	284.83	333.231	355.053	397.932	443.587	282.616	390.329	322.017	397.801	337.428	360.76	219.718	215.969	321.888	209.095
NDUFS6	O75380	100.592	778.282	761.11	513.907	644.63	510.683	112.546	461.383	297.034	367.301	752.804	581.377	576.288	558.015	648.868	667.661
PEX14	O75381	1241.7	1098.24	1546.62	1437.21	903.825	1160.43	1169.22	1004.67	1162.23	1181.76	1078.22	1185.92	724.819	730.08	843.061	763.933
TRIM3	O75382	812.357	377.575	406.291	489.366	379.507	209.068	237.015	141.477	187.372	179.083	182.169	225.006	617.382	497.204	575.826	568.837
CS	O75390	27174	26086.2	26747.3	26999.7	22027.1	24439.5	27696.5	23308.1	30140.3	29073	30300.5	30353	32918.5	37387.1	33078.9	33893.8
SPAG7	O75391	1117	985.476	1195.19	953.97	1111.78	1258.99	1333.81	1113.38	654.813	670.981	573.366	550.327	1068.59	892.876	938.527	991.949
MRPL33	O75394	514.691	569.419	889.114	760.696	601.906	581.803	547.544	463.927	529.646	578.001	528.954	615.487	529.132	478.94	509.052	398.257
SEC22B	O75396	3740.12	3227.22	4126.14	3774.4	5940.86	6869.34	6870.06	7461.23	2276.92	2062.3	2242.02	2383.01	9135.36	8514.32	8403.15	9108.53
PRPF40A	O75400	4393.14	3475.08	4187.61	3897.43	3368.76	3488.94	3173.63	3320.06	4499.47	4427.94	4255.54	4534.87	3939.65	4138.59	4566.91	3858.93
TACC1	O75410	959.088	814.987	1189.91	1107.56	547.698	549.541	430.655	574.911	399.657	372.024	384.895	499.34	485.396	456.192	635.533	478.052
NME6	O75414	75.7235	64.8147	105.888	100.049	200.479	204.416	161.773	227.344	147.413	155.404	224.296	176.122	174.156	74.2449	55.1903	183.316
LRCH4	O75427	559.023	215.608	324.993	272.749	223.922	236.886	130.975	224.376	323.206	331.498	360.145	292.619	303.493	289.314	406.296	290.711
MTX2	O75431	1619.12	1287.87	1699.02	1345.84	749.541	766.217	869.439	839.06	1263.88	1202.51	1359.59	1263.53	798.621	1142.15	735.43	981.479
VPS26A	O75436	5357.24	6284.43	6455.26	5922.39	3895.72	4224.8	4329.21	4348.66	5110.69	4154.83	4259.32	5063.96	5185.4	4907.23	4776.2	4936.17
PMPCB	O75439	2385.13	2118.61	2155.6	2022.66	3931.6	4480.29	4537.04	4252.1	2532.78	2717.26	2720.23	2819.26	3548.47	3865	4097.1	4065.3
MED24	O75448	929.361	511.449	430.896	444.486	376.79	407.022	330.074	509.519	673.215	564.927	621.499	603.64	691.693	592.725	658.447	741.325
KATNA1	O75449	291.897	538.602	462.998	322.271	525.945	477.46	485.139	516.226	574.249	582.469	726.462	583.689	502.001	638.104	631.212	622.278
PSIP1	O75475	2845.21	2493.49	3048.28	3093.65	6544.13	7365.75	8431.13	7588.56	1760.86	1855.31	2043.53	1851.76	2007.54	2075.52	1820.44	2335.76
ERLIN1	O75477	3069.87	2481.93	2437.41	2439.23	2378.47	2134.72	2217.34	2271.99	1741.06	1653.89	1214.42	1743.08	1306.26	1272.87	1369.93	1348.96
NDUFS3	O75489	6441.57	4353.57	4765.52	4779.58	2585.03	2738.74	2995.36	2689.15	3465.11	3459.43	3360.56	3780.9	2778.46	2975.22	2790.08	2901.65
SRSF10	O75494	2095.67	2261.75	2036.45	2315.4	2945.57	3079.9	3091.85	2963.1	2417.16	2969.24	2692.86	2856.11	2749.63	2816.56	2994.44	2711.02
CLN5	O75503	695.527	375.663	94.7038	587.935	1640.39	1527.65	653.101	1009.32	358.883	353.547	517.102	471.61	526.387	629.278	523.431	41.0255
ECI2	O75521	2956.99	2558.28	2514.6	2676.91	2562.37	2315.49	2551.49	2394.9	1443.85	1249.9	1059.65	1440.66	2492.81	2720.42	2863.48	2591.95
KHDRBS3	O75525	168.081	88.4635	89.3543	101.807	610.913	783.319	715.846	716.173	1084.59	1043.69	1044.74	1165.24	410.089	365.045	406.537	383.552
TADA3	O75528	179.738	137.495	99.813	175.268	109.867	160.061	129.599	156.189	158.296	130.312	124.407	115.969	185.938	147.744	197.539	148.582
EED	O75530	75.1961	332.375	494.453	428.048	470.948	604.718	589.966	667.278	957.635	919.895	1054.8	1039.21	731.495	664.953	652.692	612.057
BANF1	O75531	110.187	189.734	300.501	332.593	685.926	615.826	485.822	634.034	575.828	216.622	647.346	348.774	244.262	181.666	542.979	376.231
SF3B1	O75533	4743.06	4461.59	5151.33	4695.02	4894.83	5400.77	5317.07	5404.89	5484.9	5542.67	5176.02	5312.33	4941.74	4893.85	4843.85	4707.98
CSDE1	O75534	2720.01	2325.29	2331.19	2337.36	3255.25	3450.54	3465.55	3411.44	4063.4	4260.86	4307.21	4278.45	5921.9	5617.25	5742.89	5648.3
WBP4	O75554	363.504	111.196	314.146	52.4374	173.06	139.335	112.245	130.822	121.639	145.043	167.832	92.3889	181.528	206.687	220.418	227.535
PRKRA	O75569	1743.54	1493.72	1645.26	1506.59	902.756	915	951.35	855.143	1161.7	1298.93	1094	1155.16	1217.15	1187.26	1502.27	1338.34
RPS6KA5	O75582	86.3183	379.99	534.002	383.381	420.253	611.844	441.372	485.875	527.392	512.31	539.208	668.125	748.476	930.635	777.952	678.507
MED6	O75586	121.907	243.44	244.652	246.887	250.462	236.613	220.586	196.606	311.358	308.748	285.794	337.022	242.42	167.233	185.382	217.836
MYCBP2	O75592	222.476	145.293	143.659	152.475	281.982	294.301	286.023	258.266	204.638	234.598	252.959	250.496	194.24	190.971	165.704	202.995
GCAT	O75600	129.782	331.621	195.932	176.712	389.067	106.47	661.953	772.132	582.101	374.275	569.322	122.747	477.032	676.712	657.489	574.728
NPM3	O75607	2978.85	2334.31	1858.7	1874.31	1634.12	1329.23	1263.89	1153.15	3235.87	4138.74	4710.9	3354.91	855.003	1034.39	1222.43	1026.06
LYPLA1	O75608	26098	16594	19835.2	16872.6	17464.7	16066.4	13510.8	12061.5	15029.8	15623.6	17794.7	15870	14916.9	15847.2	22663.4	11604.8
ERAL1	O75616	1102.17	581.418	742.294	804.819	1329.39	1627.45	1415.23	1495.01	719.923	779.955	732.585	682.776	611.099	442.622	367.884	572.31
CREG1	O75629	2268.95	2354.63	2792.33	2156.92	1570.83	382.206	2802.5	2353.28	735.517	952.777	458.713	1258.93	977.616	1680.45	861.471	1024.85
SNRNP200	O75643	4287.65	4126.45	4965.39	4559.89	5377.86	5737.71	6064.09	5760.92	6476.52	6691.47	6018.77	6160.19	5166.32	5333.61	5341.14	5346.38
TRMU	O75648	132.421	167.093	113.028	302.746	262.758	421.783	509.023	401.722	375.989	312.7	335.874	358.632	187.502	88.1985	322.623	336.741
TIPRL	O75663	2597.98	2360.43	2130.94	2451.53	1350.79	1986.27	1278.01	1779.1	2060.47	2121.83	1944.79	1956.88	1798.76	1957.45	1719.55	1712.33
TOM1L1	O75674	1918.8	1428.6	1278.49	1446.18	643.234	926.069	820.652	612.793	1026.47	1047.32	922.489	952.756	1254.54	1361.3	1559.08	1035.33
RPS6KA4	O75676	4416.78	2079.24	1452.25	4293.04	1389.17	1870.62	1922.83	2206.82	4796.97	2639.72	2605.13	4045.64	4686.1	2250.42	2386.61	2878.36
SURF6	O75683	784.586	612.162	855.822	752.972	624.564	709.881	685.569	764.235	815.267	914.184	813.952	913.489	636.29	675.15	636.29	589.371
PPM1B	O75688	2518.88	2040.79	1900.97	1888.58	571.494	638.244	524.591	633.576	1036.67	1101.74	1049.43	903.766	1852.54	1616.08	1917.78	1544.03
UTP20	O75691	1038.77	742.891	910.487	796.849	530.763	536.17	633.162	561.934	2495	2634.44	2417.43	2454.97	488.377	442.334	420.936	471.358
NUP155	O75694	2915.92	2459.27	2628.85	2761	4643.76	5206.52	4998.27	4633.61	2993.67	2884.83	2562.18	2831.15	3338.06	3615.19	3309.08	3395.54
RP2	O75695	980.892	1217.04	1491.67	961.504	836.585	892.381	755.185	948.665	864.727	750.534	600.326	1043.08	621.884	674.995	703.794	766.562
WDHD1	O75717	844.515	507.027	548.733	557.842	1291.36	1299.72	1151.3	1330.29	1254.11	1221.23	1206.47	1180.43	1520.16	1717.89	1739.8	1548.73
CRTAP	O75718	629.711	721.96	713.859	653.992	2495.52	2176.8	1855.45	2495.41	442.44	439.149	506.511	577.416	432.411	414.353	234.981	337.211
SLC25A12	O75746	2973.94	2301.27	2652.89	2707.79	2289.87	2259.35	1882.43	2023.01	1917.16	1810.55	1867.95	2099.43	654.033	546.044	571.365	632.331
SLC22A3	O75751	6352.14	17043.2	18047.2	12301.9	11140.6	12516.2	14418.4	21200	3980.53	6497.26	11056.6	11917.5	5547.07	11632.4	6113.28	8437.13
PALM	O75781	369.478	377.067	380.46	373.951	504.979	614.351	539.194	569.854	120.013	82.4912	91.5281	88.4131	235.115	188.939	391.736	338.313
ATP6AP2	O75787	1941.79	1444.67	2225.63	1249.82	2041.61	2557.81	2435.83	3120.81	1346.82	1276.52	1748.33	2098.53	3396.1	2772.49	3054.75	3079.39
RNASEH2A	O75792	509.103	360.796	619.504	562.53	845.765	801.96	815.339	834.149	525.593	572.956	480.829	635.752	693.216	799.874	783.641	766.721
CDC123	O75794	212.051	325.244	525.018	464.48	493.882	630.942	713.625	579.662	605.685	610.95	628.598	554.093	459.079	487.046	423.305	455.726
POP7	O75817	590.277	532.654	397.466	345.24	401.825	501.252	339.285	407.984	647.086	608.612	556.601	538.83	685.898	700.111	663.749	592.388
RPP40	O75818	368.476	388.629	368.348	283.761	120.704	325.529	353.827	256.5	267.415	216.23	261.116	258.626	449.147	351.644	258.557	418.278
EIF3G	O75821	5121.54	5078.85	6802.72	5995.26	5705.54	6809.75	7374.94	6521.57	6976.65	7037.91	7004.11	7256.9	5409.18	5357.79	5155.81	5450.28
EIF3J	O75822	2976.31	2478.33	3702.34	3100.2	5654.32	6947.75	6932.42	6642.13	4883.69	4775.24	4305.01	5267.66	2624	2412.56	2139.48	2990.75
CBR3	O75828	7307.44	6674.02	7298.36	8845.95	4796.7	4922.4	5790.92	5921.94	3166.64	2364.44	2937	3201.05	5533.67	4771.49	5689.07	4852.66
PSMD10	O75832	754.717	1028.29	1034.59	937.122	932.279	900.695	1091.42	1050.21	785.851	742.802	772.466	826.656	1042.3	1116.56	1152.82	1112.57
AP1G2	O75843	528.105	885.924	1539.58	1060.47	617.353	494.897	489.139	421.203	784.261	821.969	730.12	831.092	791.895	819.943	813.333	664.619
ZMPSTE24	O75844	3113.07	2484.04	2400.51	2762.46	2577.23	2583.73	2833.74	2812.17	3870.97	3505.62	3371.81	3820.85	2181.42	2179.38	1957.28	2068.51
PPP1R37	O75864	449.342	70.9683	122.114	98.6112	171.162	157.871	87.2004	94.4768	97.9057	114.11	169.109	177.179	328.229	277.351	289.983	370.749
IDH1	O75874	30418.9	31010.4	30434.5	30098.8	8983.54	10194.5	9392.25	11631.5	21120.9	16227	17193.5	21837.8	9405.32	9525.49	10042.7	9833.06
GATB	O75879	712.391	859.439	866.279	876.557	858.671	1100.01	809.038	873.42	1098.59	1218.91	1045.47	1102.98	874.787	957.534	837.565	852.52
SCO1	O75880	3042.79	2294.7	3107.68	2887.61	2248.29	2214.72	1991.91	2102.12	2476.16	2727.49	2937.37	2645.23	1751.16	1838.78	1620.86	1383.51
ATRN	O75882	253.991	177.506	186.829	211.26	101.666	125.507	112.212	49.7257	110.489	129.474	216.684	160.323	154.296	151.102	125.725	113.911
RBBP9	O75884	911.187	590.811	532.869	590.271	214.364	110.267	65.1125	206.59	264.801	200.612	232.895	183.156	420.092	538.869	527.702	453.312
STAM2	O75886	2177.09	1287.09	1357.63	1260.93	419.919	716.214	775.314	868.877	538.157	618.058	599.848	841.591	1173.48	819.707	904.271	1138.17
CCNK	O75909	1536.73	1095.3	1587.03	1203.08	1247.57	1304.44	1246.45	1367.51	1696.87	1682.97	1208.08	1834.7	987.911	835.262	1044.68	1449.39
DHRS3	O75911	3656.47	5069.47	5187.43	5209.76	1069.71	61.041	1311.26	790.612	51.0817	78.934	563.524	1146.2	108.373	950.551	1073.17	77.0175
ARL6IP5	O75915	6002.65	5501	5790.04	5371.39	4265.19	4330.07	4739.47	4556.17	2156.84	2619.46	2384.27	2626.76	3334.44	3124.06	2750.76	2704.44
PIAS2	O75928	333.019	330.344	412.331	434.889	327.124	512.447	259.213	256.847	416.41	512.236	281.594	337.002	394.231	347.33	204.998	500.09
BCAS2	O75934	786.12	116.535	446.649	413.269	662.945	635.595	269.329	271.472	562.273	666.134	731.475	503.681	442.648	864.376	940.227	595.563
DCTN3	O75935	2154.93	1810.56	2134.32	1913.81	1963.73	1928.06	1790.28	1965.7	1802.25	1720.89	1547.28	1747.05	2311.75	2321.96	2265.93	2350.9
DNAJC8	O75937	2902.26	2379.27	2981.58	2741.86	4844.23	4642.53	5761.31	5640.68	4262.86	4540.81	4584.39	4614.06	4802.34	4896.09	4796.92	4881.04
SMNDC1	O75940	1200.63	1132.91	1583.38	1092.87	1125.82	967.587	1267.9	1300.07	1732.49	1588.96	1546.29	1502.41	1116.81	1257.87	1244.05	936.456
ATP5PD	O75947	1760.51	1268.12	1745.76	1320.79	2809.65	2201.56	2168.45	1297.56	1203.75	1226.04	1990.65	1068.83	819.695	1175.06	1307.83	897.401
FLOT1	O75955	1431.1	1304.79	1282.16	1205.49	1317.84	1244.91	1304.35	1555.11	237.666	318.409	216.522	255.977	687.447	727.626	831.64	850.229
TRIO	O75962	537.891	185.364	300.322	336.548	326.387	370.912	386.212	413.915	275.767	269.635	212.239	445.91	427.722	338.439	360.065	441.982
ATP5MG	O75964	8674.33	6064.05	7536.63	7442.56	9111.05	9098.93	6687.54	7572.93	7622.86	7267.81	8087.51	7698.51	8815.48	7463.29	7395.89	6634.53
MPDZ	O75970	134.165	432.542	157.797	190.738	269.539	196.291	392.359	346.657	82.9498	97.8157	88.3424	112.901	260.626	157.217	103.882	174.973
CPD	O75976	3866.42	3452.98	3528.06	3502.1	1261.55	1120.17	1173.65	1061.49	1735.26	1586.33	1473.07	1681.14	891.334	1045.21	1023.06	1057.24
GLRX3	O76003	10200.9	10431.5	12357.3	11562.8	7991.55	7839.62	8433.61	8009.98	13998	12700.4	12524.5	14178.6	9223.75	10386.5	8437.76	11240.8
RSL1D1	O76021	7498.24	6535.5	7116.13	6833.25	4890.68	5605.71	6013	5755.63	6648.86	6090.3	6518.8	7086.04	5606.37	5299.29	5333.83	5842.36
WFS1	O76024	316.85	245.437	261.616	276.36	246.094	179.555	277.592	133.621	272.349	268.413	234.24	298.801	818.764	904.441	731.516	872.81
CLPX	O76031	2171.81	1550.16	1693.1	1627.25	1702.32	1748.88	1893.62	1655.95	1607.16	1722.27	1770.25	1734.11	1597.67	1716.65	1660.43	1525.66
SEC14L2	O76054	765.166	693.659	520.114	615.299	59.018	194.53	139.566	118.604	322.411	264.29	308.892	272.387	430.851	336.099	230.997	171.213
TM7SF2	O76062	1204.25	631.294	594.717	608.39	65.8202	132.237	378.762	514.711	613.721	549.06	389.295	589.757	1237.61	812.104	1144.53	886.366
SNCG	O76070	533.867	449.029	612.265	490.857	4002.54	3541.15	5115.46	3513.84	602.834	103.62	121.463	322.394	401.605	184.774	276.752	284.176
CIAO1	O76071	1723.61	1549.92	1518.56	1447.54	1489.26	1000.27	1065.46	1264.59	1151.5	1230.58	987.708	951.936	1373.68	1410.25	1532.02	1047.87
ZFAND5	O76080	429.325	578.576	361.48	397.168	425.653	337.038	362.545	529.352	584.99	439.909	448.673	435.718	111.655	334.034	81.335	446.589
SRP72	O76094	4024.42	4162.76	4633.33	4427.37	3827.55	4132.75	4072.09	3820.83	4032.14	4393.09	3898.99	4307.43	4381.22	4532.24	3820.27	4590.35
JTB	O76095	1185.22	1010.04	1650.1	965.346	1450.79	1915.18	1477.92	1748.28	69.3406	141.207	1526.32	1502.16	1530.64	1782.75	2115.92	1252.28
DDAH1	O94760	2207.37	1925.13	2025.39	2162.53	1235.9	1294.15	1104.09	889.531	6158.49	6017.17	6529.93	5962.18	1098.88	1914.67	2054.52	2063.13
RECQL4	O94761	80.7042	73.0837	91.8416	101.679	249.886	267.204	200.644	157.211	181.557	200.274	206.326	165.256	140.202	177.174	205.091	175.574
RECQL5	O94762	267.612	276.372	183.005	183.574	147.848	70.3096	148.148	66.9432	287.572	255.633	110.202	232.648	194.714	265.463	216.272	166.267
URI1	O94763	570.284	626.346	600.02	528.192	427.201	266.402	361.781	237.262	313.539	274.85	336.888	363.447	210.028	152.51	183.353	264.499
B3GAT3	O94766	2372.15	2184.36	2018.69	2108.44	2019.94	1756.48	1454.66	2215.31	819.837	614.569	647.147	653.39	1512.35	1546.92	1421.28	1626.52
MTA2	O94776	1427.04	1140.31	1390.79	1325.66	3157.14	3349.53	2986.91	3065.76	2982.73	2925.76	2975.05	3100.06	2770.73	2714.63	2583.37	2772.41
STK10	O94804	141.63	180.36	319.499	341.995	290.27	99.2939	362.22	263.903	532.588	654.549	789.075	681.55	654.758	672.614	744.697	572.057
LTN1	O94822	660.094	439.027	449.168	444.099	406.257	552.834	388.088	227.626	312.224	359.628	323.479	225.845	733.911	674.167	668.506	651.862
TOMM70	O94826	5891.39	4927.49	5205.55	5025.47	3685.66	3534.83	3438.99	3343.73	4319.12	3926.55	4152.91	3899.48	4305.08	4666.99	4974.53	4391.2
IPO13	O94829	224.674	116.264	150.533	211.66	241.984	208.519	340.718	191.61	91.1403	98.964	81.5153	103.898	233.232	185.604	165.06	214.417
MYO1D	O94832	871.161	1444.15	1118.52	663.833	756.973	486.993	1447.29	129.975	5141.42	4980.59	4250.09	5182.86	2836.21	2888.31	2584.6	3245.32
TOX4	O94842	701.448	450.271	479.067	532.284	603.416	808.713	637.889	610.891	433.194	478.979	427.655	487.872	559.172	325.172	652.212	459.526
MICAL2	O94851	173.125	216.581	166.346	111.042	103.021	90.5808	140.855	67.6404	156.924	123.607	155.731	243.774	36.7021	61.4275	135.191	223.998
SEC24D	O94855	2038.12	1843.54	1570.97	1559.55	1939.29	2028.9	1465.99	1885.19	1050.88	836.533	1000.76	1093.56	1650.65	1663.17	1655.71	1728.81
UFL1	O94874	5201	3810.85	4471.63	4296.78	2560.9	2499.74	2544.32	2524.09	3070.54	2794.12	3041.89	3125.35	5123.38	5175.19	5417.42	5341.2
PHF14	O94880	84.2942	284.942	138.434	91.277	360.801	86.7284	252.623	448.786	299.327	214.305	312.784	222.46	204.169	208.998	262.398	140.926
TMEM63A	O94886	58.4281	206.274	158.647	152.299	163.197	294.321	71.9158	312.823	708.321	868.48	748.068	839.637	200.323	177.89	205.93	265.842
FARP2	O94887	841.023	810.942	763.878	559.849	116.475	794.557	591.978	174.465	648.615	579.698	462.453	508.602	551.329	498.46	497.957	555.927
UBXN7	O94888	510.134	446.636	502.914	457.688	738.022	1024.39	956.588	734.543	840.585	867.162	713.647	998.852	993.392	817.642	1057.03	1086.42
SUN1	O94901	523.456	373.135	372.741	323.715	648.639	583.724	618.415	571.333	544.738	509.236	564.313	528.423	355.447	351.885	380.791	342.244
PLPBP	O94903	1938.98	1977.81	2139.47	2144.01	1149.7	991.966	992.722	922.37	3415.36	3575.15	3646.77	3593.11	1462.77	1651.68	1582.93	1641.51
ERLIN2	O94905	3693.61	4052.06	3410.62	3972.55	2822.47	2918.86	2779.1	2771.44	3846.59	3344.93	3353.4	3569.01	2844.42	2338.16	2731.48	2565.67
PRPF6	O94906	3546.81	2962.16	3305.11	3078.32	3798.6	3837.3	4129.28	3993.98	4643.76	4819.77	4520.43	4446.58	4182.18	4086.24	4144.24	3847.33
PCF11	O94913	817.578	572.771	675.866	603.685	621.199	593.276	563.374	534.712	525.218	536.738	705.682	554.771	664.186	553.124	655.223	544.626
FRYL	O94915	479.656	462.362	371.399	255.807	614.775	668.903	669.074	711.846	340.824	375.692	358.745	395.219	611.065	583.897	511.024	532.613
NFAT5	O94916	144.251	579.675	287.564	321.715	341.58	189.543	238.295	370.29	584.514	192.706	244.12	312.271	186.25	248.054	504.72	207.349
ENDOD1	O94919	989.448	692.298	772.823	829.166	565.842	544.043	260.203	373.734	832.637	786.441	706.233	849.233	1024.57	864.167	742.291	968.156
GLCE	O94923	573.784	420.961	529.573	470.57	277.274	153.241	343.996	252.339	160.757	147.658	146.075	224.188	314.414	275.754	257.339	374.1
GLS	O94925	3297.21	3037.43	3300.38	3088.76	3771.2	3916.01	4124.58	3549.71	7524.03	7128.98	7157.02	6991.83	1304.83	1472.78	1280.23	1406.7
HAUS5	O94927	406.262	262.71	293.233	440.949	412.387	992.981	792.3	558.231	328.375	331.711	384.979	427.261	439.404	340.792	391.404	312.249
FBXO21	O94952	547.822	359.833	340.424	333.257	241.554	318.589	272.499	222.309	413.152	401.461	432.031	526.158	478.53	334.06	450.398	393.617
KDM4B	O94953	435.219	120.779	389.043	65.4438	189.705	271.419	106.133	369.018	624.656	514.228	520.907	703.382	650.826	581.006	608.402	634.944
RHOBTB3	O94955	126.852	148.297	56.9884	101.385	239.452	313.652	202.638	241.429	78.2705	62.738	104.148	192.889	166.234	234.103	328.549	272.218
MTCL2	O94964	134.325	90.2174	210.465	119.367	133.039	326.071	176.055	182.037	75.6168	93.5853	125.165	548.242	382.219	283.211	323.393	294.603
USP19	O94966	577.338	510.15	549.952	494.216	871.932	1153.9	964.045	1014.62	977.348	798.168	942.53	1028.69	495.722	625.019	636.344	532.401
AP2A2	O94973	3420.64	2545.25	2049.89	2502.7	712.195	851.036	713.805	731.466	1286.57	1222.88	1054.04	1085.7	866.317	916.061	894.424	895.246
SEC31A	O94979	5237.97	4892.71	5136.08	4858.81	4253.38	3991.29	3380.38	4080.36	1843.48	1712.18	1821.32	1825.42	4215.17	4190.99	4463.9	4038.93
HEXIM1	O94992	1300	1337.83	1224.99	1295.22	1196.98	1095.4	953.354	936.31	711.987	729.495	710.528	744.593	455.761	539.215	516.425	462.709
TJP3	O95049	887.095	650.699	705.371	731.038	84.829	49.9699	110.592	156.056	161.834	126.519	167.875	177.288	548.891	476.798	493.782	470.297
RPP14	O95059	1340.33	1178.14	861.752	1126.16	924.406	709.925	862.31	974.301	571.194	555.804	454.605	477.89	746.715	1137.04	959.854	806.869
CCNB2	O95067	110.247	228.211	1410.95	138.098	174.26	237.01	472.597	142.12	376.716	433.748	347.052	396.994	163.434	187.68	220.121	238.996
YIF1A	O95070	2790.96	2192.32	1834.72	1594.84	1596.33	1356.05	1380.79	1749.59	833.842	553.095	755.904	907.434	757.28	877.337	870.972	919.686
UBR5	O95071	640.086	498.685	522.46	543.345	582.027	742.327	614.918	529.63	515.147	479.068	448.655	450.466	959.833	878.174	1027.57	929.523
AGFG2	O95081	791.907	587.729	507.669	627.853	330.919	354.989	233.077	317.197	199.268	135.44	210.094	152.026	169.586	188.472	207.696	197.128
SCAF4	O95104	967.064	821.115	1224.38	1052.56	962.837	917.27	1017.81	846.396	1339.21	1229.62	1150.1	1723.54	1119.62	980.581	938.753	1227.65
NDUFB6	O95139	1517.99	1416.59	2137.08	1908.1	1463.63	1733.11	1915	1726.32	1632.47	1545.3	1278.32	1654.5	1118.92	1007.47	1072.18	979.004
MFN2	O95140	604.99	637.752	580.654	584.489	1041.73	972.096	958.555	1017.63	623.438	612.526	642.8	597.959	433.736	392.262	382.812	361.338
SNUPN	O95149	622.587	715.939	744.341	701.481	567.631	851.318	1172.63	657.617	887.888	1173.19	767.852	870.726	268.036	119.71	330.045	569.721
AKR7A3	O95154	152.96	728.814	68.4513	261.619	141.38	310.912	137.881	379.983	1319.84	1186.21	1334.85	857.975	1367.39	874.854	1022.42	639.454
UBE4B	O95155	519.299	457.479	418.498	462.586	1032.86	1010.07	1090.58	1235.11	529.705	494.842	553.075	556.261	629.824	711.231	624.452	581.346
ZFPL1	O95159	107.588	740.184	826.95	765.651	502.403	637.292	618.275	342.091	564.138	559.653	544.972	420.136	1181.56	1203.8	1461.78	1079.09
ELP1	O95163	1292.8	864.281	1048.96	1000.46	1570	1643.87	1522.19	1628.49	1269.37	1348.79	1139.95	1275.69	1594.42	1515.67	1425.08	1613.84
GABARAP	O95166	78.9939	820.096	1236.24	890.889	533.861	165.78	999.455	1105.32	1134.23	745.182	1093.73	1108.87	1061.34	720.383	517.563	947.762
NDUFB4	O95168	2280.22	1758.33	1990.46	2089.86	1097.76	811.771	950.136	931.257	1232.92	1179.96	1650.88	1414.95	1898.7	1295.33	1383.83	1300.32
NDUFA7	O95182	1772.66	1422.84	1243.39	1520.99	567.958	593.576	550.428	561.823	702.328	611.544	727.527	656.987	907.724	900.74	944.141	867.28
RTN3	O95197	406.86	1809.47	2118.09	1871.37	2133.66	1964.59	2139.02	2499.03	1742.97	1570.59	1207.82	1859.35	2014.2	2064.36	1793.99	2157.79
LETM1	O95202	5658.96	3957.96	4254.11	3876.97	4082.06	4161.09	4898.01	4171.98	7345.16	6662.46	6593.29	7452	3674.96	3773.67	3833.17	3677.44
EPN2	O95208	662.498	392.797	466.166	461.426	524.141	175.622	379.021	265.822	298.199	241.33	168.705	243.038	665.139	540.456	706.096	655.973
STBD1	O95210	715.397	911.764	662.077	655.534	526.431	549.647	471.601	533.888	674.995	368.041	353.629	551.691	674.35	533.649	1159.96	724.192
ZRANB2	O95218	140.523	487.252	792.205	554.416	1066.84	1068.13	1578.91	819.698	850.208	603.964	501.876	966.862	628.064	532.124	429.393	940.822
SNX4	O95219	526.904	366.394	432.106	474.819	361.538	296.17	281.361	312.538	237.879	234.916	305.727	370.936	495.318	518.123	454.389	554.295
ZWINT	O95229	145.089	426.176	84.7186	82.2342	445.687	388.491	539.15	429.53	484.94	570.118	360.739	353.312	411.691	429.149	335.318	322.288
LUC7L3	O95232	874.787	881.318	1256.78	982.801	1294.98	1514.81	1296.62	1410.65	1728.68	1573.63	1505.25	1740.52	1450.78	1421.82	1277.75	1478.3
KIF20A	O95235	106.833	78.3315	79.9825	42.1434	440.721	528.025	514.437	547.41	563.879	519.059	455.64	513.188	330.265	399.561	368.473	358.936
KIF4A	O95239	907.428	679.4	443.214	634.519	1588.42	1386.29	1750.68	1566.96	1451.47	1456.17	1570.31	1439.44	1507.55	1515.36	1422.21	1449.03
SBF1	O95248	377.761	163.915	242.991	306.358	359.483	380.944	373.784	394.113	185.065	206.731	132.408	128.278	350.775	396.532	423.8	396.328
GOSR1	O95249	1481.73	1863.56	1433.49	1904.24	1314.91	1086.06	1103.63	1461.66	1851.27	1877.33	1645.91	1582.77	898.108	980.35	1037.32	887.108
KAT7	O95251	380.69	342.849	473.441	395.447	450.256	403.054	603.973	611.288	350.694	325.896	349.172	347.799	586.663	593.442	589.745	571.37
ATE1	O95260	1131.72	732.02	761.775	738.737	106.221	214.765	341.816	252.52	330.563	284.81	345.443	293.74	229.257	216.658	241.645	205.005
VAPB	O95292	2283.9	1679.63	2012.9	1781.59	2203.04	2273.41	2253.64	2235.87	2556.1	2371.5	2622.4	2446.58	2890.84	1960.85	6079.59	2851.86
RASAL1	O95294	5482.1	5525.25	6487.71	4960.09	3538.83	5038.33	5817.69	3816.98	4481.28	3251.55	5398.94	5888.42	4545.58	4277.31	5363.8	6054.84
SNAPIN	O95295	109.976	228.579	262.024	232.844	140.702	162.261	152.109	74.221	83.8866	100.707	244.911	253.687	337.633	226.368	166.406	175.656
MPZL1	O95297	989.233	892.758	954.87	867.337	637.575	545.578	698.412	938.375	858.219	1005.23	972.566	1015.43	323.634	412.904	392.139	451.797
NDUFC2	O95298	639.158	981.514	1290.09	1157.64	385.527	483.848	461.896	307.149	592.944	659.069	489.489	463.127	499.505	634.191	484.026	391.725
NDUFA10	O95299	4339.02	3643.52	4676.16	4629.75	1444.83	1879.1	1963.71	1681.33	2163.24	2240.19	2032.78	2107.35	2521.5	2996.07	2512.77	2353.81
FKBP9	O95302	3935.41	3138.75	4249.79	4421.02	7485.27	8131.02	8039.6	8541.22	3584.64	3639.66	3322.78	3702.17	2212.2	2154.81	2071.96	2309.64
PGLS	O95336	1848.38	819.332	1641.34	906.728	2697.26	1413.96	1679.09	418.983	1200.59	1304.73	954.677	966.392	807.865	802.794	1027.75	807.229
PAPSS2	O95340	3270.54	3456.41	3489.66	3308.12	810.498	861.256	658.828	1032.67	3887.23	4344.98	4135.27	3668.38	884.64	716.407	975.418	678.529
SMC2	O95347	1109.37	907.452	969.187	931.483	2916.62	2859.19	3378.08	3176.24	2108.16	2239.44	2082.54	2148.55	2687.04	2617.47	2330.92	2576.18
ATG7	O95352	1857.77	1033.07	1033.55	1130.75	1051.37	1160.52	952.115	1017.2	673.976	650.108	639.285	600.951	1709.76	1736.72	1596.51	1592
TACC2	O95359	1451.51	1165.47	1226.11	1100.18	191.635	214.666	261.189	191.071	650.81	664.345	726.8	622.245	376.897	383.129	483.004	400.228
TRIM16	O95361	2845.86	2444.13	2366.37	2113.47	2764.37	2991.54	2573.48	2568.43	340.759	225.377	300.274	341.424	875.393	641.859	595.212	688.778
FARS2	O95363	134.249	442.798	322.189	481.741	274.363	387.598	277.52	428.049	193.551	153.551	233.353	97.6864	322.871	470.132	382.627	475.451
ZBTB7A	O95365	318.289	242.993	243.07	235.181	185.966	345.61	95.0314	224.895	332.052	381.584	359.498	435.116	373.219	339.213	376.056	335.596
LYPLA2	O95372	1038.04	548.313	394.203	738.484	1184.97	1115.43	1122.09	816.222	1435.78	962.911	968.296	1126.38	952.307	787.439	662.927	807.927
IPO7	O95373	4966.82	4935.23	5502.95	4921.36	6304.32	8321.16	6677.8	6909.01	1844.37	1484.4	1496.93	1611.22	4269.72	4038.95	3869.81	4541.93
ARIH2	O95376	474.289	388.251	520.304	454.78	741.993	617.232	695.564	727.956	633.401	559.108	521.435	509.298	328.174	199.404	282.992	325.082
SLU7	O95391	1055.17	574.767	106.21	580.75	608.111	621.333	539.403	619.604	475.568	612.343	633.172	533.841	466.299	505.448	892.681	657.809
PGM3	O95394	2466.19	2339	2336.9	2213.77	1778.1	1615.53	1341.87	1472.48	1053.84	961.196	1072.14	1102.4	2691.12	2802.33	3043.93	3006.85
MOCS3	O95396	694.711	572.143	442.066	506.127	447.338	455.866	356.037	533.653	682.418	495.141	678.394	502.114	753.287	812.457	852.817	706.899
CD2BP2	O95400	2536.77	1438.63	1513.15	1577.01	1804.41	1796.62	2108.49	2114.52	1146.52	1444.01	1663.82	1356.11	2242.35	2227.37	1629.45	2067.03
SVIL	O95425	846.841	633.788	697.71	620.604	614.257	552.08	524.787	574.122	330.109	263.892	257.565	287.964	540.23	453.704	590.364	538.204
AHSA1	O95433	8106.28	7905.28	7638.58	8331.69	4811.05	5539.25	5266.38	5071.1	11769.3	11565.1	11329.8	11298.3	8092.93	8350.67	8451.98	8291.25
PARN	O95453	2304.76	1251.31	1212.63	1364.32	742.284	771.152	775.924	722.747	899.23	873.204	813.083	844.647	1000.18	845.272	825.198	779.441
PSMG1	O95456	1211.64	1048.26	991.375	978.235	2633.8	2679.4	2717.85	2789.5	1976.99	2004.94	2091.57	2078.69	2180.45	2256.98	2230.09	2302.33
FMNL1	O95466	825.665	767.612	542.012	631.072	1194.03	1456.58	1146.83	1232.77	95.7467	142.275	161.103	94.7566	399.77	158.661	77.1524	246.035
SGPL1	O95470	2416.04	2088.5	2611.43	2515.71	891.682	1010.12	779.288	1069.99	1694.08	1526.83	1499.3	1670.16	3442.61	3371.71	3058.23	3232.58
NSA2	O95478	593.461	535.101	641.408	584.954	572.472	722.646	737.614	498.689	849.441	949.091	792.329	883.964	645.142	690.953	708.309	693.535
H6PD	O95479	995.557	700.064	645.662	750.749	284.841	316.726	254.63	433.715	238.036	167.176	199.859	253.999	277.034	334.195	341.577	180.856
SEC24A	O95486	2605.82	1848.26	1732.29	1943.15	1819.67	1780.07	1314.1	1370.16	1684.9	1359.75	1497.9	1471.12	2258.48	1871.35	2107.23	2076.76
SEC24B	O95487	1588.44	1190.17	1316.32	1143.32	1024.15	967.551	1033.97	1086.11	1530.13	1398.65	1289.38	1415.71	1173.96	1031.23	1240.97	1299.48
ADGRL2	O95490	725.244	843.411	1482.39	1368.43	869.293	1007.45	745.087	521.621	653.666	60.7976	183.894	130.231	157.21	172.838	527.173	888.764
TDP2	O95551	1309.24	909.392	1222.65	1088.9	339.399	444.213	765.454	628.362	306.448	456.935	432.749	355.542	328.101	361.881	302.748	575.878
SFT2D2	O95562	1405.7	1558.38	1503	1640.62	1258.5	1286.52	1612.77	1493.37	862.839	871.287	732.838	903.89	543.206	614.76	615.588	655.355
MPC2	O95563	802.316	722.426	802.324	978.638	1236.6	837.244	1329.26	1393.31	2027.02	1805.13	1710.9	1879.98	645.895	787.408	617.116	504.794
ETHE1	O95571	5121.96	3288.46	4087.84	3913.48	1133.12	1193.58	1002.14	1382.47	5855.18	5116.04	5049.5	5758.88	494.144	793.405	894.088	720.159
ACSL3	O95573	4505.65	3888.38	3477.5	3675.22	3025.76	3173.16	2804.09	2838.3	4273.57	3399.04	3049.32	3981.33	1621.75	1611.49	1791.76	1570.14
POLR1A	O95602	1229.81	783.153	774.908	825.33	792.501	866.153	905.915	743.035	1089.3	1111.18	1038.34	943.011	427.134	434.01	356.831	380.144
YEATS4	O95619	95.9537	221.883	390.452	164.09	204.907	151.606	375.672	216.17	201.586	273.85	291.503	220.172	376.041	347.861	258.113	318.253
ZBTB11	O95625	144.949	206.62	187.898	201.075	216.089	111.7	133.133	225.262	182.681	244.503	170.432	203.13	220.45	192.042	270.664	201.455
CNOT4	O95628	203.665	354.905	120.545	103.508	536.32	328.529	104.255	383.308	196.493	216.841	415.155	84.9486	310.606	216.998	816.408	397.139
STAMBP	O95630	2185.61	1984.27	1955.53	1857.9	973.752	888.119	1093.47	888.171	1652.11	1478.52	1556.11	1638.55	1986.22	1771.41	1887.42	1739.8
CPSF4	O95639	534.2	394.969	239.287	283.354	384.615	336.347	233.1	309.228	344.873	371.942	331.091	280.05	262.795	239.742	353.629	296.549
ASMTL	O95671	1113.81	790.422	788.774	900.228	717.378	824.975	687.631	676.647	324.741	277.467	286.427	530.209	2735.51	2811.59	2785.18	2949.33
CDS2	O95674	437.576	858.892	1743.68	1087.24	241.554	234.391	141.998	361.242	382.287	218.553	276.583	415.642	242.121	360.04	299.683	343.57
CEP43	O95684	92.7529	184.008	63.1348	140.314	162.708	400.849	232.192	219.61	237.196	226.37	173.81	191.326	150.95	236.471	197.525	140.027
PPP1R3D	O95685	367.767	183.394	208.783	194.987	292.493	244.778	368.738	283.962	313.699	331.377	311.46	321.717	1602.21	1662.15	1864.29	1794.7
BRD1	O95696	135.666	156.909	306.956	210.565	314.091	229.223	274.66	379.292	320.257	362.667	262.381	324.721	383.683	400.601	392.85	551.365
POP4	O95707	1022.13	688.697	962.632	965.393	794.727	717.98	730.214	753.871	604.569	735.033	616.453	676.05	893.926	668.082	778.694	827.986
HERC2	O95714	537.633	424.526	515.51	347.771	523.999	424.989	432.823	433.991	412.571	423.192	466.865	425.783	469.192	449.594	413.146	526.494
RAB3D	O95716	796.447	720.025	933.677	840.347	331.61	365.447	502.764	427.423	531.163	491.108	161.044	243.719	1410.03	1554.01	1850.9	1653.86
SNAP29	O95721	1271.57	1037.53	1223.82	1281.02	967.281	1239.82	1255.52	1267.43	1115.86	1390.75	1177.93	1160.42	986.818	1186.39	1584.63	1432.95
OXSR1	O95747	3883.46	3744.7	4431.15	4235.21	5296.22	5621.17	6020.16	5611.21	4731.92	4369.55	4044.36	4952.64	5274.14	4334.83	4108.01	5297.03
GGPS1	O95749	1254.95	829.077	910.219	981.901	354.443	328.477	344.585	471.425	624.264	351.288	413.163	590.365	483.304	373.993	351.135	453.308
HSPA4L	O95757	3647.12	2727.49	2729.17	2754.35	5308.54	4964.94	5180.99	5198.1	2477.4	2778.26	2742.19	2530.73	3223.19	3143.84	2750.52	3156.46
PTBP3	O95758	12838.5	9794.66	12062.1	10910.1	4951.98	6306.27	6949.29	5799.58	12145	10084.4	11074.5	11403.4	11687.8	11011.4	13904.6	11668
STARD3NL	O95772	1658.76	968.56	1238.93	1626.58	1594.74	921.027	1257.99	1356.29	1284.24	1118.38	793.805	78.6545	119.865	91.0422	56.2672	77.6218
LSM8	O95777	75.9308	402.62	652.363	721.136	877.748	729.098	615.363	332.969	408.872	525.622	393.9	473.046	321.615	605.456	456.527	800.883
AP2A1	O95782	13691.8	13147.4	12679.9	12668.7	13646.5	14501.2	12112.3	14050.3	5155.78	5298	5308.08	5105.83	14583	15399.4	15499	14316.7
WIZ	O95785	334.225	191.008	281.289	182.535	631.657	525.675	624.427	598.973	269.704	296.474	322.588	280.072	634.788	600.995	778.361	709.365
RIGI	O95786	275.003	317.433	74.1076	345.601	695.558	500.575	486.277	755.055	84.63	292.318	243.795	156.957	222.862	315.812	4.68939	161.219
STAU1	O95793	2590.15	2309.6	2693.32	2449.16	371.432	603.414	635.82	438.234	3432.36	3285.48	3268.03	3611.15	4321.38	3989.21	3440.96	4145.79
TTC4	O95801	549.112	346.114	527.266	429.123	650.374	480.613	823.235	603.477	761.408	910.804	699.52	888.351	528.28	549.031	573.538	454.683
TMEM50A	O95807	1056.77	516.045	665.604	278.379	631.404	598.986	330.279	594.332	260.867	198.465	450.784	269.956	300.152	188.329	213.115	296.983
BAG2	O95816	4579.33	3633.22	3982.49	3638.87	5747.9	7432.34	7198.46	6243.42	2775.05	2825.58	3031.19	2725.26	1384.54	1634.26	1136.91	1529.78
BAG3	O95817	1098.89	910.152	1138.57	952.414	1208.92	1288.25	1211.55	1201.19	439.683	408.55	406.664	423.167	2507.43	2503.33	3839.49	2600.73
MAP4K4	O95819	2926.71	2433.74	1733.81	1714.49	2219.87	2293.74	2339.45	2623.31	3403.18	4063.75	3666.75	4349.72	1485.11	1479.49	1918.13	1847.35
MLYCD	O95822	1107.06	728.255	801.954	1053.22	609.74	491.325	1107.41	710.74	546.724	491.098	691.068	786.512	1232.81	1437.97	1571.41	1331.17
CRYZL1	O95825	925.007	120.353	447.144	282.879	294.647	329.247	414.371	273.916	273.208	262.416	314.396	304.35	308.424	411.387	371.482	299.051
AIFM1	O95831	7912.4	7027.84	8060.99	7382.9	4847.92	5438	5139.47	4875.56	6151.4	6219.56	6392.17	6367.69	6271.61	6513	6329.5	6787.64
EML2	O95834	2589	2927.7	2987.2	2619.43	1372.3	1592.01	1094.4	1628.51	1741.9	1710.85	1411.54	1813.31	2409.38	2316.02	3036.49	2378.58
BPNT1	O95861	3961.32	3762.72	3531.33	3391.82	3444.81	3931.39	3574.28	3580.1	6581.47	6152.76	6824.51	6586.98	3270.42	3492.93	4051.58	3369.21
FADS2	O95864	1754.67	1961.43	2228.63	2107.88	1315.12	1010.49	518.756	809.604	3853.62	3118.6	2613.89	4082	388.66	147.692	155.503	132.932
DDAH2	O95865	505.761	218.581	609.297	149.511	490.257	302.883	227.747	227.416	164.675	375.833	277.977	229.971	349.676	574.835	468.772	538.752
ABHD16A	O95870	738.586	628.683	813.356	711.36	473.731	607.853	463.389	596.244	385.243	335.263	375.341	380.501	1188.47	1358.95	1238.62	1213.09
TXNDC12	O95881	1719.87	909.803	1150.07	892.743	3356.2	1414.26	1717.81	1015.04	1355.02	2151.8	1665.67	1058.79	937.501	1130.4	1421.71	876.644
ECD	O95905	209.519	131.429	234.566	177.875	309.635	159.788	61.6065	253.579	186.852	216.606	234.064	65.5757	412.014	261.04	245.574	145.14
SYF2	O95926	122.871	413.819	710.686	220.445	469.738	349.764	448.096	545.055	671.361	780.779	720.291	730.408	509.698	386.888	306.454	287.926
SCGB1D2	O95969	692.696	1327.42	1117.8	313.843	936.999	1315.47	2065.23	2037.3	842.518	1042.73	766.816	784.34	796.672	1284.64	641.42	953.212
MBD3	O95983	276.187	159.145	101.04	156.019	367.79	385.617	356.002	347.599	642.086	621.645	619.789	632.397	421.793	450.441	346.953	461.696
TOP3B	O95985	380.923	434.274	316.777	305.384	327.855	443.653	409	211.227	139.705	194.095	166.215	106.952	201.585	166.39	189.253	154.657
NUDT3	O95989	897.359	704.194	875.5	910.408	850.611	679.957	752.372	743.51	403.568	524.483	578.783	482.533	1137.32	1109.95	1386.73	939.355
AGR2	O95994	107088	86643.4	130549	111107	55.0851	561.586	2527.64	1675.76	116845	101011	108585	136721	7691.1	5205.09	5421.68	5728.22
NDUFB10	O96000	4950.23	4767.18	5062.71	5356.74	4612.39	4942.14	5102.96	5036.59	4366.27	4412.15	4539.41	4308.73	3592.98	3772.48	3794.07	3291.31
CLPTM1	O96005	1798.66	1729.05	1722.07	1634.57	1205.83	1204.53	852.537	1239.23	1012.6	1019.99	1009.39	1143.12	1353.89	1540.3	1216.62	1307.53
MOCS2	O96007	85.8328	657.463	69.4208	520.659	329.187	776.65	627.259	504.027	429.805	358.448	565.052	548.005	477.851	517.162	593.862	491.865
TOMM40	O96008	4636.58	3873.85	3665.17	3280.27	3677.92	3879.52	3570.99	3428.65	5106.81	4664.67	4630.47	4984.1	2640.2	3618.67	3246.48	3271.44
PEX11B	O96011	1086.94	852.562	1111.71	991.01	319.274	326.223	692.845	444.707	339.899	370.892	402.797	364.574	1178.05	1133.92	1384.83	1305.65
PAK4	O96013	1461.93	1173.63	1182.02	1276.14	369.633	362.61	396.121	277.046	481.289	523.377	451.882	551.363	1296.3	1112.5	1176.93	1227.14
CHEK2	O96017	444.996	456.928	224.868	226.733	104.933	230.987	120.393	200.408	173.585	224.193	157.603	180.758	224.405	286.409	265.668	260.716
ACTL6A	O96019	2351.03	1794.33	2065.32	1704.83	3145.24	3350.15	3173.38	3034.92	3615.74	3871.65	3726.02	3800.09	3768.37	3971.35	4377.37	4174.62
NSD2	O96028	141.98	110.182	468.926	171.53	288.717	279.932	385.608	264.639	239.692	320.609	291.791	264.572	302	251.08	231.156	283.555
CYB5A	P00167	336.719	414.792	987.162	408.23	488.616	224.228	353.46	99.1951	146.446	274.979	117.589	158.659	203.995	348.701	230.151	263.582
LDHA	P00338	230957	320506	394330	320554	235530	206088	215718	226896	209353	157104	156943	230131	329925	263135	253279	315683
ALDH1A1	P00352	195858	179602	130049	172039	145.362	8819.34	100.811	874.271	13926.3	12486	15129	17328.2	414.731	770.84	1144.49	1191.73
GLUD1	P00367	14789.1	12741	12850.1	13239	7358.49	7524.48	8034.81	7748.73	8297.93	6988.23	7269.52	8185.05	9317.25	10765.6	10744	9454.24
DHFR	P00374	660.748	492.272	530.836	590.826	4358.49	4358.99	5041.11	4859.23	2426.9	2087.28	2197	2395.4	3081.54	3753.67	2898.93	3021.9
CYB5R3	P00387	4842.03	3982.6	5157.22	4105.02	6288.74	6362.21	6777.22	7054.65	3868.99	3239.83	3107.92	3866.75	5443.54	5248.65	4752.19	5703.13
GSR	P00390	18133.1	18987.2	19133.3	18766.1	5511.98	5595.83	5666.14	6207.4	3953.4	3404.96	3953.94	3946.14	3585.14	3800.84	4194.92	3826.2
MT-CO1	P00395	91.0065	373.678	430.626	739.296	69.6854	82.7683	364.32	309.432	275.703	471.714	374.776	238.664	186.724	141.28	170.904	212.8
MT-CO2	P00403	25728.3	20404.2	31918.9	26229.9	19684.3	22554	17867.3	19846.1	18890.2	19311.4	16055.5	25742.5	11701.6	14052.5	12273.9	17025.8
MT-CO3	P00414	357.826	687.865	876.267	668.667	603.303	772.571	395.944	468.622	508.571	607.559	344.648	644.052	364.018	426.643	420.657	405.934
SOD1	P00441	1515.66	1297.93	1410.08	1160.27	1194.96	1245.78	1331.89	1216.6	1792.52	1412.16	4897.95	1696.18	395.53	1509.97	1985.19	1815.98
PNP	P00491	5193.77	6536.99	7803.32	6927.18	5122.4	5717.91	5551.28	5826.66	7981.72	6448.9	6485.1	7878.2	4443.72	4626.2	4271.05	5634.77
HPRT1	P00492	6901.07	5615.15	5859.74	5145.95	9221.41	8957.17	9210.29	8732.51	5343.66	5165.48	5720.36	5529.35	7971.64	7037.6	7532.92	8249.94
GOT2	P00505	11491.5	8596.22	9104.84	8621.48	7447.81	8422.19	8012.12	7782.94	8950.16	8299.93	9430.83	9101.05	12363.1	13733.3	13047.8	13584.4
ABL1	P00519	155.297	147.475	171.976	130.647	304.779	225.113	248.37	358.188	126.282	120.279	207.745	143.94	183.581	197.66	121.899	107.249
EGFR	P00533	1984.35	1522.32	1980.39	1742.59	1063.57	1029.56	1268.57	1290.17	518.495	608.224	501.85	591.004	141.426	260.673	510.443	174.73
PGK1	P00558	149107	145775	131427	124053	126152	109946	111299	113904	99692.9	85070.5	97184	108996	227146	171200	208331	214430
AK1	P00568	3571.75	3342.86	3126.1	3344.39	10022	9835.92	11218.9	11395.6	4608.73	4324.74	5320.5	5350.48	3657.34	3724.19	4088.28	3800.95
HP	P00738	158.394	222.39	429.337	669.254	240.777	373.172	213.583	56.2175	95.0611	61.9461	475.42	124.974	173.835	138.865	128.028	172.858
PLG	P00747	95.6991	459.408	574.485	479.037	1536.92	1689.45	1913.87	2818.49	708.617	97.0203	433.787	885.809	272.212	331.248	287.216	116.426
ADA	P00813	1133.92	1015.41	968.626	883.589	184.713	186.926	292.899	372.764	224.262	204.983	506.374	316.391	196.457	249.556	256.168	379.228
MT-ATP6	P00846	2356.75	2351.55	2731.65	2253.53	3134.34	4148.21	3688.3	4244.32	2018.81	1878.72	2259.03	1673.18	2065.6	2047.92	1853.84	1754.05
CA2	P00918	2122.48	2833.12	2550.28	2422.35	3143	2555.11	2599.9	3714.55	9915.39	6845.04	10619.9	9300.45	2379.82	2585.1	1861.75	3039.22
ASS1	P00966	1775.3	1646.54	1529.61	1912.47	1962.31	1915.88	2394.25	2503.29	3586.66	1550.54	1772.23	3544.06	18091	15053.7	14289.9	17161.7
SERPINC1	P01008	479.065	698.005	453.099	837.556	174.39	153.897	136.42	220.974	1984.4	2543.17	1596.69	2018.65	562.684	173.592	162.991	61.6545
SERPINA3	P01011	213.361	742.939	202.154	119.663	104.152	271.99	78.5998	432.061	51.7431	41.0606	63.3546	86.5035	708.897	409.103	382.582	542.175
A2M	P01023	1363.84	931.738	1433.24	824.786	1862.36	2125.63	2079.24	2616	875.013	1001.85	959.515	683.725	809.028	997.759	680.666	944.687
C3	P01024	244.202	268.413	293.906	210.597	598.127	660.042	806.483	847.854	172.778	140.981	382.303	159.05	221.219	117.467	90.3334	245.54
C5	P01031	125.828	914.044	754.456	906.121	726.826	112.215	1573.38	108.149	674.7	665.912	737.955	736.952	1037.61	362.633	785.661	125.959
TIMP1	P01033	489.317	525.837	929.287	559.147	714.617	872.448	962.419	1089.47	1064.95	770.244	951.01	1291.08	478.446	72.9387	206.864	496.71
CST3	P01034	3249.51	2529.55	2092.11	2342.56	754.267	630.269	1201.71	571.276	1362.62	1489.01	1713.62	1414.93	1387.86	1959.79	1799.21	1695.95
CSTA	P01040	688.54	1709.17	1862.75	625.27	1292.5	1114.69	2485.02	2542.34	462.779	1018.23	959.965	1068.36	748.569	831.457	444.412	1163.03
NRAS	P01111	5513.41	4395.26	4780.18	4889.7	3364.65	3457.51	4002.71	3519.87	3084.98	2953.5	3917.25	2855.84	8896.02	12065.3	10218	11686.2
HRAS	P01112	1074.04	902.803	421.379	769.685	836.584	1138.91	418.206	594.785	271.339	259.996	277.083	423.833	730.933	906.996	484.345	1327.31
KRAS	P01116	975.583	1003.16	1396.13	1067.64	689.363	621.833	920.162	941.872	1269.75	1125.26	1061.21	1336.23	603.968	506.409	453.144	566.767
LDLR	P01130	85.9181	167.769	316.49	313.167	463.943	519.28	319.266	663.017	1606.02	1369.41	1216.03	1671.14	195.083	185.1	179.015	260.279
TGFB1	P01137	1907.68	729.578	512.918	396.386	686.186	460.872	124.417	359.569	965.067	1226.07	1109.77	1456.76	514.334	341.835	298.652	521.104
JCHAIN	P01591	471.863	127.244	158.301	159.377	448.009	2034.48	1158.99	590.939	206.927	324.129	359.365	663.995	713.26	625.32	512.028	159.212
PIGR	P01833	105.182	88.6702	81.4463	192.086	115.166	270.709	215.819	225.672	147.549	135.45	162.058	129.966	278.836	104.99	71.499	78.5597
IGKC	P01834	710.317	444.179	466.44	196.449	757.372	1664.51	1258.23	758.421	154.896	315.868	455.164	848.177	429.948	179.249	87.3364	338.632
IGHG1	P01857	1175.55	958.569	863.281	317.555	1264.95	1571.7	1142.43	1277.63	58.0224	781.994	663.685	2100.91	1441.66	865.928	753.207	987.354
IGHG2	P01859	374.177	61.5317	261.318	184.346	358.556	165.514	116.292	51.1882	45.9356	127.631	240.239	336.102	149.476	311.472	144.644	75.1392
IGHG3	P01860	241.217	157.223	655.668	255.399	368.681	499.346	302.187	626.742	214.706	250.605	273.293	740.303	429.69	279.962	217.54	747.408
IGHA1	P01876	137.038	235.062	121.274	114.485	497.541	2510.84	682.809	390.857	228.398	273.118	347.781	295.233	223.236	224.071	103.657	462.014
IGHA2	P01877	1141.36	294.252	394.859	89.825	710.385	2755.97	1474.1	787.297	363.128	395.153	677.849	701.683	793.919	696.819	62.5353	182.243
HLA-B	P01889	2516.24	1875.46	2070.53	1819.07	22412.9	20026.9	18551.3	26111.9	720.564	615.887	623.526	539.375	638.732	406.035	296.334	275.387
HLA-H	P01893	137.351	303.922	290.545	511.963	2626.67	2741.4	2613.88	3285.12	52.1856	94.3382	68.0275	137.846	144.927	63.5294	245.955	157.827
LMNA	P02545	47406.9	52443.8	55721.4	52856.8	66704.6	65346.8	65422.1	68601.6	74020.1	69051.5	77734.7	73444	29126.4	28104.9	31677.5	28960.7
APOA1	P02647	20597.3	20822.5	22800.3	13990.8	23143.6	26188.1	91.1141	88.0486	18483.7	87.8789	18372	17533.7	46658.5	25724.2	185.662	26934.3
FGA	P02671	849.181	1815.56	2466.28	2164.59	893.701	964.868	768.597	797.953	387.368	403.599	839.248	1546.88	1388.34	67.0387	101.624	202.749
APOH	P02749	2958.73	996.357	1306.04	1041.58	618.885	718.143	1179.92	127.948	75.0455	428.368	1299.6	772.329	355.197	852.818	580.146	786.318
FN1	P02751	2451.01	1872.92	2409.65	1994.05	683.537	766.964	792.208	513.065	399.348	266.318	212.307	329.096	415.169	276.366	257.322	385.536
AHSG	P02765	7042.91	7900.37	14209.4	6572.54	9473.22	12706.5	21010.9	9675.9	4995.56	6662.11	4679.03	3225.92	1879.53	5421.39	7705.42	4706.47
TTR	P02766	158.722	1580.32	1761.83	2039.09	1745.91	2234.76	1922.93	53.1355	1922.78	2257.99	1814.46	2181.69	2512.74	136.707	2255.71	85.9056
ALB	P02768	74119.8	75000.6	95062.4	51586.3	78364.5	91106	156605	95708.6	48485.9	62224.9	41018.9	51124.8	36575.9	51611.3	48309.7	46708.5
AFP	P02771	84.5124	371.089	942.481	145.692	286.149	366.648	932.979	580.615	392.434	400.941	368.111	94.4709	188.298	270.617	187.234	126.685
GC	P02774	119.508	680.451	555.114	455.892	1073.8	1079.36	947.735	575.924	265.359	596.416	92.5011	157.961	311.735	517.354	922.979	392.023
TFRC	P02786	4336.42	4054.33	4482.26	4164.84	10676.1	11220.3	9581.55	11037.4	5108.46	9311.07	5733.67	5224.01	3191.39	3069.35	3344.85	4081.76
TF	P02787	923.505	573.59	722.641	558.231	645.991	1296.51	716.15	510.064	452.941	547.746	580.097	391.742	806.031	615.338	751.173	1066.02
LTF	P02788	916.614	871.247	1228.04	660.316	1820.9	2716.98	2027.66	2277.63	903.848	1553.3	1191.73	1033.48	957.571	1218.08	1450.79	682.265
FTL	P02792	3423.03	4271.63	9549.74	5669.72	6983.38	3314.38	8876.33	6137.4	1715.75	2436.62	106.515	2222.01	2261.31	1349.39	4500.52	2325.84
FTH1	P02794	338.255	896.763	1022.43	779.512	4776.32	3868.84	7445.4	6207.87	1548.81	464.656	376.083	1353.7	122.771	367.897	336.956	507.745
SMR3B	P02814	456.081	333.531	315.484	58.4091	443.724	342.338	1144.93	754.259	213.589	575.074	388.359	444.351	302.838	295.113	69.8194	472.096
MT-ND1	P03886	119.47	990.666	1368.62	1449.65	411.588	184.885	307.133	501.367	1043.34	846.188	361.935	901.744	749.786	723.844	508.225	572.946
MT-ND3	P03897	935.84	1221.11	657.692	986.353	310.17	763.299	489.089	244.545	855.884	734.333	854.241	564.769	509.885	316.083	777.762	649.02
MT-ND4	P03905	576.117	1304.93	1447.47	1648.61	806.608	1115.02	1062.26	1027.28	1205.17	1065.84	900.337	1415.83	669.513	750.742	559.408	746.589
MT-ND5	P03915	320.888	680.007	812.031	970.925	505.243	337.372	569.344	476.453	430.267	468.09	421.757	391.421	375.933	597.791	485.815	555.794
VTN	P04004	1094.17	914.944	874.348	1053.51	5318.75	6430.35	4452.92	3859.58	824.973	292.265	460.208	993.368	458.866	298.35	451.04	192.633
CAT	P04040	7178.32	6407.83	7331.25	6691.31	5431.92	6259.95	4780.05	5507.48	7466.17	6587.87	7436.06	8269.94	3436.04	3887.19	4375.27	4039.03
RAF1	P04049	382.652	233.482	531.918	454.143	381.223	347.099	476.163	341.853	405.273	498.538	346.205	471.598	724.901	610.873	603.484	690.44
GBA1	P04062	2404.05	1643.24	1988.48	1873.44	1904.5	2258.58	1704.58	3052.44	1674.35	1370.14	1806.59	1822.81	2198.72	2498.75	2089.07	2361.1
FUCA1	P04066	2224.5	1085.49	1500.75	1530.22	794.824	692.13	110.752	400.272	562.349	352.933	486.977	513.71	872.315	1009.43	871.412	1098.19
ALDOA	P04075	224077	222379	210647	205612	198032	173224	160333	182996	199043	161437	194302	205975	464922	403908	514271	456865
CSTB	P04080	1064.14	1718.18	2577.53	2140.71	2365.4	1739.6	1366.26	880.079	2320.9	2506.31	2812.93	3639.49	1442.08	1427.61	1573.99	1296.78
ANXA1	P04083	108515	91059.7	90103.4	84552.9	16991.3	17391.8	22220.4	23138.3	3814.36	3541.95	4444.46	4166.68	1252.08	114.005	137.482	196.777
APOB	P04114	785.97	351.032	342.175	480.593	515.15	389.808	300.436	382.793	745.065	985.773	944.514	828.337	607.975	703.266	790.317	644.674
NR3C1	P04150	1379.31	841.004	1372.31	1117.83	1155.25	1249.47	1176.51	1252.57	157.574	95.143	75.4273	71.1143	399.249	313.835	411.549	332.942
SOD2	P04179	1572.1	1349.07	1857.83	1678.51	3162.34	3195.94	2259.54	3679.83	4042.45	3044.95	3714.91	4114.1	412.466	678.253	733.828	687.427
OAT	P04181	10183.1	10407.1	11929.8	11967.6	1887.25	1704.34	1747.61	1741.29	11877.9	10857.1	12095	12365.5	12353	11173.1	8582.68	11538.3
TK1	P04183	115.476	204.479	349.058	241.921	716.238	774.643	587.2	675.334	1208.71	1307.81	1088.18	1243.87	1932.12	2210.91	1995.63	2123.06
SEMG1	P04279	113.056	99.5997	37.5459	115.271	133.975	227.767	147.519	139.999	86.759	103.007	96.6735	117.512	50.6824	83.9739	80.704	64.525
TUBB4A	P04350	3094.73	3967.11	4958.55	5451.34	6951.26	3210.41	6243.82	4672.34	4075.59	6179.06	8257.78	5383.36	10883.7	14332	18571.5	7826.38
GAPDH	P04406	213803	237242	259889	220740	244468	237122	241992	268934	165860	165508	194449	196021	334150	266077	290190	336869
ASL	P04424	3688.19	3441.04	3593.82	3767.25	558.522	539.62	527.757	801.299	1818.81	1833.78	1719.05	1960.4	2249.28	2215.34	2032.23	2114.66
HLA-A	P04439	2720.42	2179.79	2718.72	2563.87	13574.2	17698.2	17084.8	20643.2	72.9355	80.0524	140.283	71.9358	1147.53	814.867	695.845	980.088
ERBB2	P04626	672.985	829.009	968.253	781.092	487.315	350.833	762.816	614.808	392.874	500.985	457.383	438.778	641.383	629.038	767.823	597.593
CAPNS1	P04632	5533.51	6249.74	9833.21	8589.15	4182.53	3204.93	3582.82	2924.64	4320.92	4250.74	4642.68	4895.29	2205.91	3690.89	3699.01	3796.32
HSPB1	P04792	16955.4	14830	21399.7	17022.2	19667.5	18601.7	19518	15557	801.878	524.387	969.004	1833.64	66868.9	92953.9	88725.9	102002
TYMS	P04818	270.351	275.98	457.639	523.351	2593.58	2777.16	3102.99	2574.23	544.478	559.147	513.79	752.559	2248.67	2362.75	1725.42	2164.39
RPN1	P04843	19449.6	19165.5	20787.9	19458.4	19944.4	19142.8	19285.4	21257.6	19695.1	17901.3	19539.6	19871.2	20604.5	20493.6	19641.8	21127.2
RPN2	P04844	9300.08	12245.1	13583.1	12759.3	9519.51	10861.4	10736.9	12507	11495.2	11053.1	10795.7	12295.3	12170.9	11497.3	9798.33	12672.2
GNAI2	P04899	1272.53	1467.27	1390.3	1254.54	2360.39	2506.66	2626.27	2479.27	706.41	750.264	753.641	666.062	1631.37	1725.58	2178.61	1769.92
H2AC4;H2AC25	P04908;Q7L7L0	83014.5	135310	90967.6	113696	139975	163563	177132	190820	124661	91857.5	133674	130953	147592	141552	151128	159219
SLC4A2	P04920	736.122	636.056	598.384	592.293	497.573	483.387	349.61	603.11	731.493	622.998	763.179	776.85	311.087	308.38	342.981	357.742
ATP1A1	P05023	20144.7	15680.5	15782.4	14885.7	14835.8	14834.5	14170.1	16604.8	43869.6	38967.8	48861.8	46062.8	15285.4	15453.8	15451.9	15086.4
ATP1B1	P05026	11772.3	10447	11354.8	10060.7	5489.48	5015.57	5552.53	7141.46	27921.9	25019.4	32279.4	28581.7	6069.08	5247.51	5427.58	4888.01
APP	P05067	731.706	515.704	596.279	663.822	396.798	373.79	345.272	440.553	1075.64	951.223	927.982	1003.61	315.053	188.553	214.529	241.166
ARG1	P05089	1317.36	2191.77	2366.59	1416.63	2102.82	1889.62	1814.65	3274	838.53	931.135	1797.76	1631.34	922.876	1294.48	979.947	1828.9
ALDH2	P05091	64294.8	53414	48233.1	48739.1	5252.19	5747.83	5017.84	4663.43	15552.7	12392.9	13884.4	16572.7	901.629	1064.1	1279.13	1364.92
S100A8	P05109	679.274	1233.04	1556.82	542.123	971.06	1266.88	1919.56	1419.88	643.847	902.253	2138.38	5790.95	5767.19	1030.74	687.068	2277.87
HMGN1	P05114	1926.16	1614.55	1751.05	2042.57	2605.37	3558.8	5263.53	3905.82	2336.22	2439.58	2165.63	2758.73	6603.73	7379.61	6946.1	7629.27
SLC25A5	P05141	41984.8	44908	45789.8	41242.8	41103	45581.2	48769.9	45671.2	48081.2	44148.9	50293.8	52346.1	46395	51478.5	49752.4	46012.5
ISG15	P05161	397.426	86.866	81.8144	222.795	7277.26	6054.57	3504.54	10597.1	2382.22	1767.14	1863.56	2482.5	2218.26	1882.85	1358.37	1760.84
PCCA	P05165	1409.07	1534.42	1451.18	1374.35	1074.99	851.671	751.832	751.492	833.623	907.235	691.238	834.835	882.307	1092.81	1166.38	939.74
PCCB	P05166	2045.35	1222.31	1225.53	1269.36	850.826	834.742	919.564	708.013	628.544	769.635	756.979	749.334	698.53	915.137	1035.53	909.32
EIF2S1	P05198	14806.1	15157.6	15560.5	16004.3	14472.2	14864.5	16278.5	16647.8	16705.2	17674.5	16385.7	16294.3	17185.5	17436.2	15573.9	15484.7
HMGN2	P05204	912.493	823.263	1030.81	1047.73	2157.7	2568.1	3217.13	3048.93	1496.28	1599.02	1610.37	1794.85	4217.81	4050.25	3313.16	5201.48
RPLP1	P05386	729.373	1060.22	849.593	594.828	4483.49	3900.23	2866.24	1564.12	421.833	1082.2	4501.21	784.929	449.338	730.079	1346.05	615.347
RPLP2	P05387	4775.48	6776.81	5091.13	4130.72	8361.65	10343	8001.52	8950.76	2228.66	4084.97	13441.4	3197.9	4404.79	3310.47	4600.48	4096.24
RPLP0	P05388	40480.4	28864.1	34582.7	32077	32138.8	37450.3	35779.7	33798.8	36911.1	35463.8	38171.3	37896.6	29253.1	27234.5	26208.7	29650.9
POLR3D	P05423	1803.07	1164.84	1116.01	1769.97	1482.77	1542.94	1765.36	1332.71	821.501	1318.88	1084.18	1203.4	743.389	565.262	788.79	973.901
SSB	P05455	8973.81	7005.33	8677.64	7836.39	4846.52	4972.58	4831.19	5365.31	8173.57	7259.82	8342.06	7811.76	7202.72	7385.16	7343.92	7402.16
ATP5MC1;ATP5MC3;ATP5MC2	P05496;P48201;Q06055	966.652	1006.62	1189.02	1425.2	1062.67	1096.5	672.133	1267.7	1214.84	937.426	1444.33	1522.19	960.121	626.653	851.758	879.232
ITGB1	P05556	16401.5	15915.2	15083.2	14857.4	12665	12445.2	11950.5	13307.8	5026.07	4920.91	4612.36	5328.97	4090.57	4389.41	5014.79	4439.1
UROD	P06132	1714.82	1635.83	1922.27	2024.79	2702.17	2131.45	2496.9	2534.74	2337.59	2407.96	2215.37	2371.09	1253.73	1412.65	1589.13	1342.65
GLA	P06280	4536.59	3320.18	2890.14	3196.68	3707.27	3689.45	2897.21	2425.84	1455.55	1057.79	1487.88	1281.23	1245.03	1393.54	1442.49	1312.14
GSN	P06396	5489.26	4770.26	5249.02	4910.95	3860.12	3731.13	3581.26	3640.32	1000.62	687.332	734.891	1154.87	9796.67	7377.58	8104.68	8515.07
RB1	P06400	401.909	278.626	429.867	428.609	478.14	315.973	70.1718	301.745	1502.94	1532.87	1516.44	1457.94	1406.84	1434.62	1262.02	1520.05
PTMA	P06454	31850.4	39762	42768.3	38027.1	63150.7	68852	71440.2	62943.1	83478.5	93655	122119	96548.3	12964.1	90420.7	84500.8	105729
CDK1	P06493	1559.22	1410.12	1611.86	1528.55	6929.5	7034.58	8601	6290.66	9166.73	8873.17	8361.53	8674.4	9290.21	10638.9	9049.65	8902.77
ATP5F1B	P06576	53102.2	46364.5	50080.1	46597.8	50023.4	54744.4	58720.1	55373.3	36305.1	36439.6	41799.6	40310	37276.6	38459	37254.8	39935.4
S100A9	P06702	939.678	1880.33	2435.91	848.355	1334.89	1403.44	3030.81	2142.25	912.126	1542.81	3230.41	7433.36	9736.63	1699.84	985.15	3582.55
S100A6	P06703	19106.6	35376.2	24341.6	21126.8	26210.5	39857.5	6644.12	9808.06	49175.1	58506.1	27754	50769.2	854.231	73.4432	1313.79	156.115
EIF4E	P06730	5381.29	4860.22	5283.73	5057.23	3966.85	3755.15	3984.33	3779.4	6951.6	6539.53	6075.87	6465.44	5095.14	6030.52	5432.42	4502.27
ENO1	P06733	196604	196699	192325	182025	253266	256649	265775	268017	152781	139824	160423	167169	197535	159147	183161	187704
PYGL	P06737	15711	15522.1	14919.2	15468.4	15899.2	16684.1	14430.1	15515.8	17887.7	18923.9	17457.2	18277.1	4763.18	3537.57	3722.29	4339.31
GPI	P06744	67369.6	75366.7	74204.8	67085.8	43576.2	38263.8	31396.1	33772.2	44793.5	37828.2	42406.2	45089.1	52540.5	41715.5	48866.7	47583.4
POLB	P06746	607.335	412.216	247.281	291.885	133.401	195.093	362.652	137.878	320.702	349.101	348.508	280.84	144.45	100.313	274.836	117.448
NPM1	P06748	47707.6	36031	31465.8	36680.4	28154.1	25599.4	29269.7	26914.2	36025.1	35679.7	37998.6	36018.9	31909	38668.1	38161.2	34274.2
TPM3	P06753	2166.4	3503.13	4592.68	4460.57	2885.83	2983.17	4271.93	3898.37	2438.3	1867.38	2064.3	2286.93	4105.45	3586.78	2895.05	4248.26
ITGAV	P06756	4647.89	3681.18	3889.86	3785.47	2386.72	2464.73	2151.35	3023.1	967.879	983.408	833.997	901.361	1739.36	1678.16	1586.13	1661.55
HEXA	P06865	3907.81	3664.42	4337.47	3981.38	4324.52	4358.39	4195.85	3962.06	1325.56	1178.95	1498.11	1507.69	2207.16	2512.79	2302.31	2442.07
EPHX1	P07099	18025.2	27359.9	32015.2	29878.7	10764.9	10166.8	11789.1	10876.1	2660.44	2722.94	2517.5	2777.52	918.638	1136.03	1217.9	1209.09
DBI	P07108	202.665	528.078	600.911	593.12	336.707	526.704	154.275	455.518	537.768	805.238	846.759	718.116	375.749	407.144	340.807	1054.04
LDHB	P07195	60052.4	52912	64349.7	49629	41174.2	40788.5	45179.5	40189.3	24018.6	21567.9	23904.5	24570.4	1086.72	1686.22	2678.56	2891.43
CENPB	P07199	783.974	480.114	639.065	559.855	321.206	424.257	374.069	318.226	174.691	206.306	233.042	113.353	786.239	903.792	803.209	807.172
GPX1	P07203	404.555	359.661	570.904	276.705	3832.3	3570.13	869.407	775.431	550.51	1695.21	864.561	718.935	78.9311	110.828	77.8142	282.646
PGK2	P07205	704.168	664.78	963.216	591.815	625.087	582.824	614.008	470.554	421.244	362.142	395.6	522.352	1184	600.827	964.745	1267.1
PROS1	P07225	650.805	630.593	551.305	488.56	107.884	265.543	168.1	287.324	153.79	216.706	179.16	153.561	118.814	142.091	107.852	83.7164
P4HB	P07237	33132.6	38643.2	38758.2	39300.5	40477.4	38862.4	38538.2	43877	27579.1	24994.5	26112.6	29500.3	32414.6	31529.7	28056.9	33556.3
H1-0	P07305	29089.9	21173.5	21296.8	19911.1	3430.36	3431.13	2961.31	3043.98	7924.75	6492.77	8346.61	8224.03	16168.7	15198.6	17723.4	16148.6
ACYP1	P07311	1168.57	288.292	342.107	253.491	561.078	499.005	508.967	468.083	570.558	535.592	727.762	527.098	359.267	448.737	313.623	461.927
CTSD	P07339	92766.3	67127.4	75718.5	66871.3	16322.9	20055.1	23462.6	18357.6	31067.7	29066.9	43427.8	35428.4	38043	33426.8	31754.7	41369.3
ANXA2	P07355	254130	224379	238964	218342	95849.9	98151.3	102587	112780	67611.6	57184.6	63123.3	73541.6	27356.2	23912.2	27310.8	27232.3
CAPN1	P07384	9535.38	10857.5	11953	11558.4	4924.17	5102.23	5069.19	5609.52	7084.34	6298.9	6323.96	7329.05	11065.9	11617	10433.7	11513.3
TUBB	P07437	112049	69911.5	85897.4	64256.6	78739.2	88085.6	93617.7	80363.8	51445.5	54064.4	59323.6	57453.4	104562	99317.7	99918.2	127298
PSAP	P07602	4244.3	3394.97	3832.24	3821.56	3059.63	2646.73	2398.63	4357.02	3416.93	3119.27	3591.09	3764.28	1676.42	1439.8	1924.58	1646.45
HEXB	P07686	3220.58	2610.55	3250.61	2771.53	3996.85	3852.05	3124.15	3126.05	1519.8	1140.61	1655.22	1540.52	2573.19	3207.24	3159.29	3020.74
CTSL	P07711	3233.32	4008.91	3663.93	3561.31	1195.2	1415.92	1510.46	1247.17	358.075	131.293	408.38	117.29	1122.05	977.858	1046.44	1195.82
PFN1	P07737	41210.9	27677.5	40292	30491.1	48091.7	33299.2	36275.4	24393.8	31458.5	39944.5	46679.2	31321.3	41832.5	42926.9	48665.7	42808.9
BPGM	P07738	866.241	404.264	541.542	513.548	760.226	759.144	1011.7	548.657	297.925	196.496	166.558	269.933	125.497	130.306	103.172	216.159
APRT	P07741	10601.6	7983.44	10537.3	9095.44	6329.26	4948.07	5890.72	4342.81	8086.63	8928.84	10367.9	9048.55	14754.2	15389.3	14740	17215.1
EPRS1	P07814	11117.7	11193.9	11220.9	11266.3	11517.7	11614.6	11655.9	11778.9	8186.53	8080.64	8039.73	7750.56	11066.3	11009.8	10773.9	9961.11
CTSB	P07858	5341.11	4951.97	5079.92	4862.42	1521.1	1365.5	1308.61	1050.32	4000.16	4167.2	5489.43	3546.41	1588	1834.36	2581.25	1669.5
HSP90AA1	P07900	35421.7	38792.2	46965.9	41125.8	33869.7	34190.9	40800.8	35200.5	67780.6	66494.7	64225.6	71292.6	66448.7	60621.5	61811.1	64664.1
GALT	P07902	768.64	814.898	908.924	509.744	404.959	663.595	368.336	819.688	214.312	219.309	104.15	94.2096	219.098	73.3906	86.444	159.59
HNRNPC	P07910	64531.1	65182.2	64672.4	63518	63498.4	76758.9	64468.2	67244.3	70769.7	76173.5	83736.9	78718.5	76335.2	79550.5	80443.1	83738.5
LAMB1	P07942	825.062	850.354	971.299	877.388	992.545	933.663	949.921	1093.1	991.937	1092.01	1021.47	1086.69	151.828	72.6807	73.1673	95.0594
YES1	P07947	40860.4	25415.5	24896.9	22016.7	6745.98	6340.11	7835.16	5839.62	7936	6978.48	7440.11	7657.58	13160.9	12658.7	11791.7	10489.1
LYN	P07948	1464.42	1086.04	904.493	1006.38	495.474	849.426	251.155	499.535	3232.74	3365.44	3252.27	3295.81	61.7519	124.274	571.307	159.76
TPM2	P07951	26481.5	36941.2	30232.8	38121.1	30308.7	29148.6	35406.5	36113.1	15972.8	14595.6	16616.8	17723.9	29784.5	27569.6	25857.9	31010.2
FH	P07954	3638.68	3391.72	3283.02	3175.24	6398.86	6281.73	6483.47	6334.65	7137.36	7055.5	6982.23	7367.99	3070.37	3108.69	2686.11	3043.25
THBS1	P07996	131.244	441.544	420.348	394.668	523.654	552.568	750.498	714.776	155.522	231.581	123.425	153.096	828.101	1021.96	721.649	976.141
SP1	P08047	380.843	173.811	269.182	289.135	493.661	475.191	618.647	628.764	217.091	356.672	281.43	249.11	296.745	145.67	488.706	263.259
IGF1R	P08069	1268.81	1002.97	969.451	956.915	295.953	414.019	396.655	575.875	567.175	634.354	543.964	603.855	514.411	464.022	474.001	430.877
COL1A2	P08123	545.483	88.7452	431.797	912.493	119.882	74.9519	963.354	707.483	667.94	887.427	80.4031	844.047	697.882	99.3531	391.297	1121.98
ANXA6	P08133	3591.24	3808.48	4134.36	4239.72	9094.43	9827.41	7657.08	7941.88	627.709	604.352	528.992	690.057	13655.1	13315.9	12027.1	11661.2
RHOC	P08134	5564.28	6528.45	5308.8	5918.14	6020.33	5698.28	5033.06	5889.05	6898.11	6757.34	6014.1	6291.22	6748.47	7167.39	8656.7	6834.7
CD55	P08174	1451.3	1342.56	1776.48	1377.34	6204.4	6264.12	5419.74	6259.47	2997.19	2171.36	1800.8	2635.42	1000.18	988.238	2701.46	1067.62
SLC3A2	P08195	30401.3	31128.5	35442.9	34462.3	30840.4	27479.6	28483.2	34175.2	21830.1	20486.3	21528.4	22901.4	31602.8	27141.4	26629.3	28117.8
GUSB	P08236	1195	1093.62	1349.7	1214.89	2573.35	2233.88	1828.93	2273.55	865.38	712.874	621.492	950.164	1753.69	1797.42	1623.79	1575.86
PFKM	P08237	2589.31	2803.92	2893.96	2548.24	3501.33	3861.13	3410.07	3507.74	3556.23	3754.68	3341.57	3577.88	1137.44	1138.29	1113.76	1243.82
HSP90AB1	P08238	94771.8	104561	119404	111285	120376	126882	141522	132741	175587	182440	189340	189610	199627	191580	171633	197492
SRPRA	P08240	1335.45	1078.7	843.271	979.576	1905.44	2226.87	1824.99	1946.35	1316.83	1418.74	1231.46	1183.02	1504.53	1453.51	1567.48	1367.22
ASNS	P08243	10601.7	10109.8	10156.4	9265.57	7538.82	8073.47	8455.16	6666.69	18021.1	24969.9	21841.6	18200	23903.2	19674.6	18162.9	19571.6
HMBS	P08397	4077.01	3420.81	4042.35	3360.79	2279.77	2494.89	2398.95	2218.25	4916.72	5161.23	5001.77	4537.32	3895.11	3607.23	3409.13	4164.78
PDHA1	P08559	5257.09	5854.83	5180.26	5707.95	6097.59	6313.27	6583.73	6460.09	5175.34	4822.64	4539.82	5122.4	3768.71	4026.38	3777.56	3761.69
CYC1	P08574	3339.84	4918.74	5932.92	5046.94	5590.28	4381.82	5270.17	5225.17	6400.06	5426.14	4945.78	6256.9	4131.35	4498.35	4187.29	4052.68
SNRPB2	P08579	1944.36	2098.25	1879.48	2190.37	1930.65	1791.53	1743.83	1889.18	2784.1	2395.85	2455.73	2577.97	2527.29	2737.94	2477.36	2200.53
MET	P08581	1034.53	593.346	449.736	509.224	465.479	442.071	470.335	433.699	220.188	328.814	325.327	233.89	87.064	92.4803	222.569	193.061
MELTF	P08582	1094.33	712.951	720.757	788.837	112.53	210.816	204.955	231.117	362.404	530.779	408.194	559.387	299.524	261.391	234.345	53.6383
CFH	P08603	605.38	379.695	372.884	472.621	521.25	515.391	539.937	476.379	60.9485	312.805	226.933	84.664	200.492	52.151	91.5528	124.39
SNRNP70	P08621	10119.6	9895.22	10842.2	11077.7	9574.18	10232.2	10792	11123.2	12208.7	12869.8	12422.3	13156.2	11687.7	11284.9	10447.9	11555.2
ITGA5	P08648	905.512	1142.44	857.051	965.514	2769.39	2452.98	2413.84	2465.07	74.0934	73.2669	287.224	120.227	850.065	376.616	607.176	808.533
NFIC	P08651	422.769	375.712	523.997	402.106	826.342	974.823	744.361	954.984	226.78	195.254	198.879	229.141	176.962	198.76	236.968	369.05
VIM	P08670	33039	30770	35496.2	31534.1	37166.4	34314.8	44284.3	46754.6	1021.91	1025.57	1127.66	1174.36	685.708	432.69	899.636	987.605
RPS17	P08708	14565	8795.26	10365.4	8901.28	11234.5	11852.7	9933.73	11199.3	10250.4	10340.3	11961.9	10601.9	10697.2	10272.1	11112.9	10834.2
GNAI3	P08754	736.587	956.458	735.944	899.567	1035.17	1270.28	1300.59	1383.11	940.363	940.745	1024.41	1039.91	1309.22	1485.99	1809.22	1387.84
ANXA5	P08758	58910.5	50015	57926.5	50884.4	44196.2	43803.6	43399.3	54371.4	19176.6	14395.6	17471.8	19700.2	29931.7	30677.3	28647.7	35375
RPSA	P08865	36662.4	25920.3	37696.9	30573.2	34818.8	30653.8	32950.4	29955.7	32725.6	32589.6	35804	32840.5	22688.4	30210.3	26008.1	31338.6
CD63	P08962	504.253	1542.27	765.171	889.572	669.596	1087.28	680.979	959.126	556.71	354.777	284.213	398.999	478.374	883.763	835.173	823.389
MRPL3	P09001	1390.47	931.297	1323.55	1388.29	813.283	1300.55	1019.96	909.265	1166.74	1061.9	1175.88	1040.46	931.667	997.822	996.034	881.646
SNRPA	P09012	9943.86	8399.51	8902.76	8380.15	8546.74	8988.99	9662.08	8678.15	9364.12	10557	9719.88	9825.68	8807.85	8998.5	9110.06	10080.3
ENO2	P09104	4061.58	2764.12	2803.86	2383.53	2956.53	3732.33	2942.33	2486.36	2746.09	2489.1	2719.92	3004.47	3757.91	3087.9	4795.82	4327.03
ACAA1	P09110	3795.73	2651.53	2722.32	2775.02	1331.93	1244.58	1069.42	1268.46	3243.79	3386.71	3461.42	3477.07	2924.67	3257.19	3588.25	3225.38
SRP19	P09132	1091.94	763.03	818.248	779.896	742.985	710.415	659.4	580.484	868.751	894.405	802.12	876.058	968.316	898.865	1092.31	1020.41
GSTP1	P09211	51771.1	36392.4	44217.9	39654.3	23727.4	19885.5	18708	15438.9	1452.02	1377.26	1496.24	1746.99	1020.57	141.962	67.5517	82.817
SNRPC	P09234	1991.59	2040.39	2665.75	2240.84	1721.54	2259.25	1772.84	2128.38	1827.83	1719	1991.71	1656.29	2451.54	2151.76	1755.62	1736.4
VIL1	P09327	6481.79	5224.14	5880.86	4564.99	952.693	958.234	911.253	841.85	1322.78	1252.41	1321.72	1465.03	123.144	929.211	245.67	975.423
LGALS1	P09382	1552.58	1293	1375.56	1126.01	6491.19	4344.5	4208.26	1624.9	112.026	514.335	89.0819	70.361	257.823	319.084	342.697	437.679
QDPR	P09417	4282.7	3540.55	3035.48	3123.88	2153.33	2056.72	2365.95	1883.04	2810.71	2950.66	3168.4	2560.82	1865.86	1630.43	1472.44	1485.28
HMGB1	P09429	15804.9	19604.7	18307.5	18781.4	17842.9	16312	18543.6	19775	31810.8	28664.5	32209	29003.9	45773.2	46580.6	48430.2	42801.4
FBP1	P09467	161.074	836.656	65.5936	2632.19	505.383	380.613	471.325	662.069	324.453	289.036	580.109	410.783	21805.3	24932.4	28217.4	26378.4
TPM1	P09493	4108.07	4570.18	3780.22	4455.14	2810.9	2816.15	3535.58	3126.79	3827.52	3370.26	3451.72	3868.23	2779.7	2428.74	2628.54	2488
CLTA	P09496	3626.3	3060.52	4452.26	3821.62	4251.71	4278.82	4357.67	3477.21	2670.18	2777.86	5216.95	2610.57	918.21	2656.37	2683.91	2713.34
CLTB	P09497	4487.28	3659.41	4081.62	3812.12	3461.89	3525.54	3569.51	2837.65	2654.81	2906.78	3714.41	2754.82	1580.62	3605.73	3671.26	3907.63
ANXA4	P09525	119498	110907	103979	100206	2375.65	2570.01	2374.82	2859.93	3335.27	2672.02	3107.28	3193.96	6094.35	5560.52	6444.57	5706.45
CNP	P09543	3908.47	3297.68	2753.69	3096	3537.05	3510.89	2900.09	3750.05	2583.92	2573.1	2500.53	2557.11	913.344	832.432	996.602	810.896
HMOX1	P09601	4321.76	2588.63	2237.83	2656.84	1331.54	1289.72	1428.06	1645.1	213.266	132.348	163.775	291.201	483.991	296.432	356.724	360.042
DLD	P09622	6761.91	5944.9	6168.71	5491.8	5503.87	5581.77	6173.65	5557.23	6426.66	6297.99	6257.83	6625.35	5005.38	5642.98	5058.56	5111.12
HNRNPA1	P09651	29680.1	35380.4	48796.3	44093	38581.2	41814.9	55422.8	46830.8	43355.8	42207.3	46261.3	43639.5	40849.1	39731.1	31195	42264.1
SNRPA1	P09661	6578.24	5491.15	5919.12	5550.86	5781.52	6144.73	6507.11	6756.71	8022.76	7699.27	8236.98	8708.58	6798.83	6787.58	6448.72	6897.28
CTSH	P09668	542.48	262.573	80.574	477.393	70.0566	605.701	505.467	403.176	240.729	424.168	358.028	315.368	682.048	654.375	837.902	745.651
COX6C	P09669	5256.78	4714.84	4799.4	5572.11	3122.31	3269.86	3711.83	3119.2	5167.35	4667.54	4354.79	4430.43	5230	6360.88	5827.79	4938.13
TACSTD2	P09758	114.59	638.336	342.899	1125.98	404.453	501.429	590.991	683.281	438.778	484.205	111.03	116.74	1723.25	1736.31	2332.57	2260.91
PARP1	P09874	10100	8994.38	9371.23	9035.19	13948.4	13033.7	14197	14179.3	15248.9	15839.4	15719.4	14628.1	7910.34	8121.65	7419.39	7625.87
POLA1	P09884	1765.87	1364.52	1218.99	1247.02	3890.08	4328.48	4723.74	4287.24	2246.44	2157.77	2287.88	2347.2	2564.66	2737.5	2954.41	2778.56
LTA4H	P09960	11788.9	9437.9	9642.81	9833.17	3895.52	4174.49	4132.67	4229.27	7649.91	7116.62	7295.92	7362.57	5405.49	5258.46	5069.43	4940.2
ALDOC	P09972	21422.3	20232.9	21241.7	16487.6	23681	16123.6	7986.19	13862.5	105017	69452.8	60220.5	102108	86952.6	63013.6	63125.3	84296.6
C4A	P0C0L4	1052.03	879.346	904.434	923.202	859.11	610.588	606.065	786.911	352.939	272.606	551.792	493.059	678.267	877.721	568.57	735.473
H2AZ1;H2AZ2	P0C0S5;Q71UI9	6820.84	12977.8	10880.5	10994.1	8615.44	6063.57	16406.6	14055.9	10962.7	8065.33	10854.6	10825.9	13134.2	14804.5	15289.5	16063.9
H2AC11;H2AC20;H2AC18;H2AC12;H2AC14;H2AJ	P0C0S8;Q16777;Q6FI13;Q96KK5;Q99878;Q9BTM1	15178.6	20663.5	12202.3	20341	19137	9742.15	22085.9	26023.7	21428	15260.5	26383.2	21177	33973.2	35881.3	36375.1	31193.5
FBXO45	P0C2W1	50.9928	130.912	143.608	166.746	123.87	453.359	273.015	333.668	101.732	229.895	230.697	313.127	315.282	227.287	422.652	351.172
CISD3	P0C7P0	982.079	1038.17	588.253	688.653	262.997	251.642	386.006	326.971	385.182	203.898	448.529	552.777	706.611	622.841	388.64	566.335
POTEJ	P0CG39	72.2851	570.152	629.958	434.086	453.328	495.348	558.91	489.523	363.173	392.687	381.871	278.153	250.319	440.977	893.2	481.86
CCDC166	P0CW27	80.8187	698.49	1247.88	1489.29	1416.05	1343.53	1230.51	1340.83	1499.74	1840.29	1318.32	1225.9	159.35	157.357	744.318	753.888
SULT1A3;SULT1A4	P0DMM9;P0DMN0	14374.1	16288.7	16828.1	17669.8	2628.52	2260.81	3209.59	3217.37	504.933	2675.84	760.499	312.819	1948.19	1879	1898.44	1820.42
HSPA1A;HSPA1B	P0DMV8;P0DMV9	78991.3	71064.6	75267.2	73334.8	60081.4	60202	71578.4	59588.8	23316.8	20109.7	21230.9	22858.7	80064.7	78402.1	86704.5	79507.3
IGLC2;IGLC3	P0DOY2;P0DOY3	154.243	407.884	559.393	125.584	315.978	1367.1	1278.47	523.607	97.6379	422.072	434.181	698.058	596.499	469.128	323.266	726.57
CALM1;CALM2;CALM3	P0DP23;P0DP24;P0DP25	781.311	904.495	1126.54	1065.9	696.582	843.664	1048.29	609.951	488.827	615.641	3110.41	638.838	827.829	412.236	1331.22	698.654
POLR1D	P0DPB6	947.966	907.248	492.825	984.873	1158.48	1157.97	51.8555	140.926	1384.12	1489.88	1588.69	1517.35	68.6496	498.525	93.3404	1066.39
EEF1AKMT4	P0DPD7	701.928	545.345	661.082	911.547	1686.72	948.584	433.942	873.348	715.59	573.675	569.71	706.675	1239.4	1239.31	1128.41	1609.68
TUBA3C;TUBA3D	P0DPH7;P0DPH8	5627.1	2900.51	2555.71	2356.74	2637.6	1724.56	2214.18	2761.21	1759.82	1779.48	1327.24	1433	3037.28	3078.06	4472.3	3172.37
ZFTRAF1	P0DTL6	192.181	277.706	208.683	73.3427	120.141	135.458	150.96	150.235	58.9392	85.9016	93.4027	198.567	119.226	88.054	107.005	91.1328
RO60	P10155	3807.05	2749.16	2704.71	2801.09	2733.08	2886.86	2528.42	2677.13	1558.62	1632.9	1502.95	1449.16	2858.91	2734.93	3035.93	2651.49
MYB	P10242	1261.79	60.5876	864.193	66.859	95.378	1714.69	1125.2	1784.45	2063.02	113.765	1964.3	2953.14	1598.01	1619.68	2154.69	2357.15
GAA	P10253	6199.89	4270.18	4877.56	4796.94	1386.38	1302.31	742.776	914.803	1434.02	1334.94	1571.56	1511.48	3545	3636.72	3848.05	3640.21
RRAS	P10301	5092.35	5039.67	5588.74	4920.25	1481.53	1818.65	1327.33	1819.11	1264.24	853.021	817.946	875.935	2156.61	2272.45	2230.86	2093.6
HLA-C	P10321	3134.47	2182.43	2672.45	2525.14	21087.4	22486.9	23109.4	27707.5	1043.1	991.361	964.62	1275.43	1353.79	675.037	1021.09	1252.18
ARAF	P10398	827.192	1071.21	1149.78	1123.8	801.473	875.177	712.57	660.462	623.894	752.5	854.68	778.447	1158.4	963.492	1061.67	1053.3
H1-4	P10412	230211	150831	126078	133387	145018	137394	156473	145896	90876.1	98096	106055	92627.8	135438	155295	178653	139671
DLAT	P10515	5707.62	5068.37	4781.44	4463.2	4019.51	4655.31	3593.69	3756.87	8568.79	8043.23	7992.74	8766.35	3958.59	4255.95	4148.07	4432.38
PTPRF	P10586	2776.57	1913.59	2155.11	2123.32	300.656	420.97	325.125	391.661	856.692	1051.43	831.705	952.366	2851.24	3169.87	3002.28	3143.44
NR2F6	P10588	310.879	73.0381	192.471	413.322	61.2507	354.515	116.121	212.76	25.6527	156.102	337.585	496.494	272.339	353.611	286.052	319.15
NR2F1	P10589	1171.75	674.669	986.715	952.388	887.584	562.291	988.137	902.05	688.098	1001.18	597.298	608.875	748.641	769.882	637.662	736.764
TXN	P10599	2965.08	3311.69	4728.93	3942.45	3101.9	2567.7	3971.19	3079.95	2523.42	2937.71	4825.49	2926.57	1663.01	2052.35	2206	2356.88
CTSA	P10619	2947.49	1979.7	2848.85	2600.71	2014.77	1543.05	1286.23	1693.33	1636.45	1386.55	1901.39	1542.88	1537.86	1434.84	1388.12	1569.58
MGST1	P10620	2865.24	4732.81	5777.38	5028.97	1533.38	1588.27	1322.91	1644.48	2054.97	1729.07	1689.3	2556.74	1908.71	1521.36	1980.12	1745.99
MAPT	P10636	2158.9	2059.1	1450.47	1750.14	1347.67	2690.59	3355.25	2556.5	1725.09	1803.16	2033.34	1575.68	3677.61	3746.95	3942.96	3206.9
PRKAR1A	P10644	1422.27	1195.29	1191.31	1186.01	2408.87	3074.21	2744.83	2749.9	726.291	736.709	783.706	816.844	1898.32	1738.57	1652.08	1646.04
ESD	P10768	10998.3	10444.8	11194.1	10980.4	8756.47	8153.13	9275.16	8304.43	11065.5	11279.5	12091.6	11270.5	11727.1	11681.4	12008.6	10678.5
HSPD1	P10809	70642.8	53924.4	55914.1	55797	84108.8	90224.2	97910.5	84246.7	90187	90780.2	102052	96656.5	49431.4	50690.2	47407.9	50142.1
CLU	P10909	5444	3460.72	3295.45	3321.85	12401.8	13533.6	7949.6	11689.6	235.519	224.245	374.16	356.859	4440.99	3732.75	3765.33	3781.59
HSPA5	P11021	36150.9	38775.7	37365.4	38040	54510.2	54493.6	58952.4	59912	34978.6	31341.5	35185.7	35755	34292.8	30805.8	28131.1	30977
LAMC1	P11047	124.996	366.117	423.328	460.286	654.703	672.63	785.488	732.71	994.769	1104.64	1056.09	1036.11	354.842	266.21	415.363	292.049
ACP2	P11117	1205.42	1166.85	1196.77	1168.48	2586.72	2722.52	2108.06	2871.5	579.261	442.824	691.027	639.419	773.343	671.688	701.145	696.247
MAP2	P11137	685.984	674.296	742.771	802.522	456.68	449.948	850.005	426.157	107.177	90.3725	68.785	60.9475	294.896	259.536	110.623	204.684
HSPA8	P11142	54819.1	54671.8	61957.2	58328.9	50187.8	54177.4	56769.8	52353.7	61047	60470	63565.8	64237.2	71162.7	63756.5	59618.5	67584.9
SLC2A1	P11166	5973.37	5248.45	5064.59	4348.69	3068.79	1929.98	1959.87	2608.72	13564.7	7342.24	8634.12	12316.4	6419.7	6110.7	5624.29	5730.24
EPB41	P11171	2800.61	2592.69	2889.76	2541.63	3210.17	2859.08	3200.33	3124.89	3586.16	4027.76	3450.16	3656.13	1173.14	1484.29	1884.37	1693.27
UMPS	P11172	2788.25	2485.1	2571.07	2310.76	2300.08	2321.09	2711.15	2625.12	3108.17	3057.94	2845.8	3199.47	2500.26	2988.6	2610.48	2867.76
PDHB	P11177	8835.09	7153.28	6858.87	7185.79	7662.61	9299.59	8869.98	7896.13	5925.53	5742.06	5369.46	6273.45	4334.34	4825.27	4368.6	4376.26
DBT	P11182	589.171	431.472	387.779	403.114	639.489	633.302	688.764	596.189	822.537	776.196	741.764	796.909	414.542	411.689	436.485	382.967
PYGB	P11216	10247.2	10760.9	11104.2	10341.9	1062.47	958.257	1014.7	1106.21	23445.1	19322.2	21422.8	23788.8	4192.38	4047.27	3927.48	3978.73
PYGM	P11217	3453.99	4187.28	2311.47	3232.11	643.097	971.808	137.104	610.229	8156.19	7611.5	11089.7	6870.5	1885.77	1694.58	1595.52	1434.15
RALA	P11233	1072.59	1353.77	1542.39	1448.26	1511.82	1520.05	1475.17	1361.56	1871.92	1378.77	1348.63	1641.15	1055.64	1094.26	1063.76	1236.59
RALB	P11234	2545.24	2171.64	2302.58	2218.22	1006.88	1116.1	1331.15	1144.72	1590.56	1593.84	1474.89	1809.35	2663.33	2523.18	2439.43	2639.08
BCR	P11274	400.819	414.099	414.239	437.811	291.559	334.411	320.417	471.048	413.069	383.392	500.181	461.514	439.377	313.371	350.347	310.739
LAMP1	P11279	4811.72	4231.59	4469.76	4161.02	13292.4	12777.2	9602.54	14690.6	8143.32	6894.28	6706.94	7806.48	4901.02	5044	5348.84	5542.43
ACADM	P11310	3785.87	3604.63	3657.6	3762.57	6181.65	7136.96	7059.21	6741.84	5697.43	4918.58	5740.27	5481.57	2780.65	3136.9	3338.82	3174.51
TOP1	P11387	7453.43	6694.22	7645.93	7078.86	9149.07	10054.2	9284.99	8998.3	16335.8	16204	16860.1	16197.3	17622.7	17640.3	17870.5	16985.4
TOP2A	P11388	394.431	293.156	419.623	394.874	738.392	757.86	944.695	861.279	2241.79	1585.02	2712.88	2109.88	629.934	863.525	410.911	862.801
G6PD	P11413	212834	236033	246228	233282	29684.3	31277.5	42251.8	37160.9	8630.03	7297.57	8129.77	8131.76	60434.2	52490.5	53560	52163.7
UBL4A	P11441	544.859	348.849	483.29	419.676	499.451	521.189	507.278	422.604	376.713	381.048	531.502	391.459	834.115	759.769	790.706	757.598
PC	P11498	3688.2	2801.91	3114.26	2849.39	7687.22	7860.97	8400.97	8391.34	455.239	435.58	494.242	396.39	2183.99	2448.26	2205.49	2200.7
DMD	P11532	113.037	105.369	396.184	132.523	487.377	653.719	534.114	619.287	720.746	618.695	530.666	755.353	881.182	646.595	542.851	577.355
MTHFD1	P11586	23162.2	20438.2	19797.4	19619.1	27057.6	28175.7	28911	29255.7	17826.7	19620.9	20078.7	18275	32089.7	34975	34786.6	34727.1
IGF2R	P11717	1434.7	1124.22	1146.9	1097.43	2579.8	2625.3	2241.35	2332.32	66.324	71.2594	92.6799	99.3749	1074.29	1042.02	1221.14	1191.13
ADH5	P11766	6375.37	7288.53	9431.88	7903.31	4792.38	5296.65	5069.09	5513.31	5217.63	5091.82	5078.62	4895.44	5458.78	5580.63	5359.89	5462.24
CDK4	P11802	452.799	529.624	610.008	528.817	1822.49	1894.46	1828.69	1683.56	491.524	560.371	563.318	538.563	1464.9	1507.97	1354.68	1389.36
PRPS2	P11908	2288.47	1930.49	2200.62	2342.04	3049	3177.64	3146.99	3071.57	3924.85	3771.75	4075.96	3676.37	2742.19	3011.56	2978.17	3020.81
PABPC1	P11940	35718.4	29074.3	31824	30872.5	36707.1	38458	39342.1	37650.9	41658.5	41383	41835.4	40816.3	42220	41869.8	42316.8	39567.6
PCNA	P12004	11617.7	8150.68	7711.29	7271.24	10375	11555.8	10972.5	10659.8	10301.2	11512.4	11177.1	11328.8	8023.3	10470.2	11096.6	10010.7
HARS1	P12081	9653.15	8167.43	8244.16	7902.83	9259.01	10629	10461.6	10979.9	8853.3	8887.82	8820.66	8943.68	8709.91	8812.67	8466.21	8813.23
COL6A1	P12109	112.854	169.535	66.3699	82.2035	148.171	243.428	470.293	119.51	488.809	606.979	570.342	540.71	106.131	127.214	140.437	134.264
SLC25A4	P12235	5361.07	5355.77	6134.85	5997.74	5734.47	6907.78	6567.39	6010.28	4814.68	3943.54	4745.11	4828.82	5465.04	6884.49	7098.84	5755.8
SLC25A6	P12236	9631.33	4930	6134.23	6692.76	5771.57	9224.15	8541.5	6422.01	5031.13	4671.73	5972.2	6092.55	10723.1	10543.3	8945.51	10417.1
F5	P12259	841.16	967.319	493.929	384.393	437.626	400.088	394.125	433.797	269.853	138.344	166.067	291.919	431.635	266.105	484.011	269.765
IMPDH2	P12268	4954.41	4936.9	5980.16	5116.81	8944.12	9569.89	9195.47	8795.53	10414.1	10802.2	11876	11018.1	6302.56	5393.75	5405.97	5827.33
TPR	P12270	4547.69	3757.38	3987.31	3909.49	4884.3	4774.42	5312.64	5078.45	2687.24	2697.63	2537.21	2682.02	3898.54	3924.18	3855.85	4004.46
PIP	P12273	1036.4	1240.25	1461.66	521.303	711.303	2094.53	1993.8	1341.28	395.6	804.379	619.964	642.161	950.519	940.74	764.441	701.886
CKB	P12277	883.652	220.383	322.188	64.5093	7065.66	8545.37	8608.59	6512.75	100.317	724.35	324.742	164.187	3166.97	2666.65	2714.37	2389.87
ANXA3	P12429	8891.16	7291.81	7578.61	7564.89	8701.43	8541.61	8126.98	10136.5	10508.3	8322.18	9370.43	10707.8	1763.96	1219.6	1494.93	1347.08
CKMT1A	P12532	3703.87	2490.85	2369.54	2556.16	433.629	373.822	696.333	469.512	6334.94	3567.11	5133.44	6772.96	10625.3	12077	11853.6	10502.2
BCKDHA	P12694	2260.27	1940.96	1774.46	1705.83	1859.41	1571.15	1816.97	1489.97	2067.43	2038.02	2229.06	2022.93	1740.11	2004.62	1777.19	1820.76
ACTN1	P12814	23040.4	25267.6	26941.7	26504.3	13148.8	13502	14915.5	15088.8	18122.4	17503	18241.3	17768.6	15208.7	15686.4	14996.5	15026.6
CDH1	P12830	5415.04	4235	4267.53	4135.81	66.2526	135.986	132.724	122.806	2308.71	2390.23	2040.65	2389.96	3217.84	3562.01	4399.47	3488.9
SRC	P12931	36303.4	34288.6	29168.9	28166.7	1423	1728.31	2009.02	1297.42	2563.49	2884.85	2485.98	2859.12	1768.94	2199.68	3293.68	2567.89
PEPD	P12955	6733.16	6452.23	5410.09	5914.94	1707.15	1907.15	1136.34	1520.63	3669.03	3354.77	4266.2	3930.35	742.29	1346.29	1466	1238.39
XRCC6	P12956	17314.3	15879.2	18386.9	17367.8	16812.9	16982.6	20895.4	20426.6	14470	14809.8	16021.5	15172	19007.6	18468.2	16745.9	19602.7
XRCC5	P13010	13408.4	14571.1	15096	14748.1	15595	15058	17170.5	17600.9	13756.6	13588.2	13934.2	14134.7	16964.8	18039.5	16956.6	18164.9
UNG	P13051	843.23	794.396	671.475	680.281	1631.42	1705.61	1382.56	1379.7	1747.81	1924.87	1603.95	1724.47	3248.82	3164.02	3191.81	2868.14
COX4I1	P13073	25742.8	26902.3	27572.5	28058.8	19361.9	22271.4	24890	23121.3	22965	23853.6	22921	23695.7	19265	19518.5	22006	20426
ALAS1	P13196	73.9617	123.273	159.589	281.127	105.421	115.927	101.216	144.375	258.735	248.934	280.894	271.211	182.774	69.1575	121.053	101.188
IFI30	P13284	800.831	610.4	542.351	626.933	1787.23	1489.84	1209.73	874.016	706.124	586.623	757.699	669.649	922.82	2598.13	2587.9	1653.19
LAMP2	P13473	6598.08	5291.88	6185.03	6021.53	4315.2	5271.69	4666.69	7233.32	3611.65	2945.89	4231.21	4200.64	4424.6	4177.29	3155.91	5180.57
RNH1	P13489	7842.5	7093.96	6239.68	6090.86	2711.05	3018.89	2479.32	2562.24	4895.37	4788.91	5043.98	4970.31	5258.82	5234.89	7002.03	5819.23
CYBA	P13498	2583.08	2204.04	1240.11	1734.32	1034.9	804.356	532.699	853.374	2030.93	1886.15	2016.82	1997.03	76.6213	98.3988	9.59651	109.225
VCAN	P13611	3493.81	2439.9	2641.42	2755.48	378.287	194.773	74.3737	123.403	186.038	634.815	114.063	589.131	417.824	72.0991	87.7783	89.9435
EEF2	P13639	38680.7	49594.6	50698.1	48854.7	65238.6	68860	65445.3	67601	89646.6	84551.8	91638.2	93254.7	79971.2	76636.3	73038.4	77361.8
PDIA4	P13667	26477.3	23443.1	25150.1	24233.8	8023.92	8154.99	8157.47	9104.6	14304.9	13778.9	13583.1	14627.2	17306.9	15839.4	14661.4	16306.7
P4HA1	P13674	3493.68	3221.18	3161.07	2577.9	3793.02	2927.47	2182.09	2238.93	3292.86	2311.02	2372.04	3641.99	6640.13	5604.06	5937.25	6819.75
TPT1	P13693	2258.1	2359.71	2584.51	2655.69	3842.75	3320.76	3571.2	3322.07	5712.61	5253.85	6710.79	4982.77	3758.2	6016.7	5795.96	5568.49
ALAD	P13716	1156.07	647.98	730.742	656.223	659.74	854.36	735.323	693.637	556.892	782.521	731.876	661.538	1089.4	1228.09	1600.45	1228.56
PLS3	P13797	7104.21	5918.73	6635.97	6143.16	5539.86	5646.21	5360.25	6309.18	1812.57	1531.63	1512.97	1656.3	3644.02	3144.43	3058.89	3439.99
APEH	P13798	5335.23	4339.31	4182.24	4170.52	6839.51	7664.29	6651.86	6602.79	5970.87	5936.47	7087.13	7605.1	2136.72	3729.39	4259.41	4114.25
ETFA	P13804	19254.5	18335	18099.1	17448.2	9969.9	11686.1	10788.5	9537.34	14275.9	15532.5	16339.8	14697.1	11166.3	11632.3	12557.6	11308.4
GYS1	P13807	1126	697.331	1027.22	912.094	875.193	782.141	933.011	980.991	1584.28	1659.62	1506.42	1545.44	2318.11	1714.15	1740.48	1925.3
PRKAR2A	P13861	3756.84	3249.7	3508.53	2969.83	3525.84	3709.07	3690.55	3897.01	3791.63	3973.09	3785.26	3781.38	2381.77	2409.7	2616.34	2552.87
ENO3	P13929	856.341	1082.91	1000.21	932.594	3645.26	3075.83	2162.61	3376.63	83.1055	142.878	450.77	181.305	195.534	127.333	258.279	148.707
GTF2F2	P13984	1047.32	1051.67	896.783	981.948	1098.24	1418.03	1330.68	1229.18	929.51	872.814	902.906	779.288	788.257	792.453	967.94	779.747
CD59	P13987	1852.08	1522.04	1839.42	1816.21	11032.5	10612.5	7399.76	12348.5	852.756	663.554	785.429	843.651	1411.97	1802.41	1945.41	1696.4
MTHFD2	P13995	2389.39	1688.67	1483.78	1317.79	1481.68	1468.17	1395.08	1409.28	4327.89	4273.75	4140.86	4318.92	3996.11	3862.56	3711.84	3403.45
MIF	P14174	11841.3	6712.64	6202.33	7429.19	6192.53	7676.16	5565.72	4544.59	4380.68	5560.68	5686.21	5178.46	3476.44	5278.59	9899.48	7264.41
CD99	P14209	615.342	328.113	613.958	721.462	1449.8	1090.9	827.656	936.714	115.156	191.344	145.658	176.17	556.345	341.916	651.003	374.81
PRKCSH	P14314	12669.1	12312	11384.4	12532.6	17411.1	16531.8	18104	17200.5	12460.4	12051.9	11568.8	11390.6	11349.2	14522.9	14217.7	12441.3
FDPS	P14324	6114.59	6293.9	6458.32	7281.52	22261.4	23950.2	20457.9	25488.8	22931.6	17677.7	15927.6	22655.2	12048.9	10153.5	11173.7	12373.6
TRIM27	P14373	64.2764	461.358	90.7837	82.3212	463.31	599.041	269.823	631.041	506.396	347.245	501.452	53.92	624.033	654.655	736.3	786.412
COX7A2	P14406	2773.2	1952.87	2109.66	2353.19	2120.82	2007.87	1371.47	1045.52	2202.98	2077.23	1889.39	2415.22	1238.05	1548.18	1712.44	1434.42
AKR1A1	P14550	5663.18	3944.36	3841.91	3952.9	3796.17	3876.19	3275.99	4192.91	3542.01	3768.11	3526.81	3608.15	3373.9	3419.8	3731.86	3490.37
PKM	P14618	205665	187636	195012	174235	181540	172918	194261	187447	258546	241103	290929	279664	123009	105780	113200	117078
ACYP2	P14621	607.161	403.048	359.576	553.115	488.589	449.427	607.929	392.956	309.907	295.005	435.369	351.682	478.337	359.097	313.005	375.291
HSP90B1	P14625	68040	64215.6	70439	64996.9	40968.6	41320.7	42217.9	45030.9	58898.4	53265.8	56963.1	62348.9	44022.8	37879.2	37649.2	40304.5
CCNB1	P14635	196.606	161.823	183.11	152.55	868.115	844.022	909.654	770.755	1771.02	1735.56	1689.82	1571.43	749.242	670.111	559.083	717.424
MYL6B	P14649	3519.88	1251.03	2922.56	1107.82	5194.42	4478.32	5278.19	1443.1	1108.61	2414.71	1263.75	1084.33	461.201	1026.52	1217.97	533.877
SNRPB	P14678	6182.83	5330.39	6607.54	5869.01	5650.72	5022.72	6056.67	6224.33	6410.86	6325.35	5943.48	6406.16	6707.68	5968.02	7874.67	6666.35
IDE	P14735	2890.62	3051.41	3357.51	3414.39	2058.8	1925.38	1958.06	2013.51	1494.06	1331.29	1369.61	1548.99	2937.29	2439.16	2099.21	2202.71
MMP9	P14780	3080.77	3517.93	1003.42	1878.25	4766.13	138.214	2877.19	3734.04	2109.1	2947.4	77.7853	2236.97	5406.82	4710.91	6684.8	2821.35
COX6B1	P14854	887.089	593.793	153.183	724.19	534.587	354.421	155.921	98.4816	257.118	351.768	504.725	349.201	80.6656	98.5245	527.542	479.936
POU2F1	P14859	774.043	334.915	504.682	363.839	363.507	564.004	485.948	526.699	564.027	553.439	534.016	571.818	595.78	506.223	608.168	598.447
HNRNPL	P14866	14734.6	13693.6	14633.2	14022.9	15174.2	14895.2	14673.9	14578.3	12663.8	13203.7	13290.7	12558.8	13720.9	14237	15841.3	13492.5
DARS1	P14868	10605.9	10147.6	10343.7	9462.9	8210.85	8365.72	8639.58	8758.26	8827.08	8646.81	8779.08	8881.27	12402.5	11430.1	12375.8	11946.5
JUP	P14923	9058.18	8572.11	8775.45	6726.22	8517.56	7624.96	6027.03	6783.46	5789.71	4357.88	6251.82	6567.52	4008.04	4410.74	4762.69	5075.05
UQCRB	P14927	1133.4	958.497	1675.63	1234.35	1334.23	1142.78	1384.42	985.317	957.855	975.264	2075.69	928.984	546.035	902.937	876.399	931.866
GLUL	P15104	236.608	80.5894	254.652	179.226	842.317	858.754	1023.1	1758.12	753.847	783.723	1034.52	1126.37	1605.11	1512.48	923.477	1579.08
AKR1B1	P15121	9715.31	14376.7	16299.4	13888.9	2690.38	3902.28	3853.63	4211.61	1027.01	697.781	508.307	462.396	309.238	1143.93	164.499	136.675
PVR	P15151	1856.25	1551.86	1331.93	1531.89	813.398	627.818	890.523	882.114	1052.63	886.234	930.63	1093.24	288.495	278.249	296.631	257.034
GSPT1	P15170	2828.03	3458.16	3461.83	3420.44	3686.59	3463.85	3756.26	3704.35	4218.05	3715.26	4182.28	3783.09	5202.07	5705.23	5278.33	5295.42
ARSA	P15289	3130.84	1547.52	1698.68	1578.03	1154.72	1035.13	740.507	931.39	59.3782	217.461	92.2741	354.883	476.095	448.472	609.446	541.731
B4GALT1	P15291	1687.63	1428.18	1484.31	1810.55	4226.06	4192.02	3805.54	4893.47	796.233	603.502	592.594	691.18	724.131	488.705	557.582	707.321
EZR	P15311	27481.4	26441.9	25096.5	25652.6	12930.9	12986.1	13879.6	15207.8	28086.2	22028	24839.4	26310.3	17575.2	16771.5	15971.6	16473.8
ATF2	P15336	288.427	144.797	195.764	247.887	297.808	76.23	180.127	146.392	143.954	66.4954	108.884	142.995	199.472	105.514	141.565	99.6951
UCHL3	P15374	1218.51	536.807	1146.12	824.214	1901.74	1365.52	1153.36	1045.72	2172.43	2292.38	2032.31	1808.17	862.604	1871.53	1492	1681.45
FOSL2	P15408	119.58	147.119	162.065	135.336	49.0058	148.691	109.387	90.8974	232.184	130.231	230.301	297.645	113.705	142.249	134.034	246.789
CD46	P15529	576.013	506.701	452.2	625.523	509.303	532.439	491.064	459.615	356.682	342.478	390.205	461.176	140.327	103.813	73.4117	112.59
NME1	P15531	988.161	2271.78	4440.66	2958.76	2838.91	2763	2493.95	2628.59	3225.74	2532.45	2298.75	3435.04	2409.04	3047.97	1794.52	4053.95
NQO1	P15559	230433	256820	265514	254644	53548.2	58759.2	64521.5	62056.8	45663.1	33156.7	48506.5	42845.7	15703.4	14046.8	17637.6	13593.7
GNS	P15586	5337.33	3710.49	3263.33	3634.43	3170.77	3509.81	3240.6	3152.73	619.225	417.445	625.336	604.047	3873.66	4177.19	4595.2	4334.55
PHKG2	P15735	498.313	374.55	367.216	376.351	485.57	369.909	485.015	370.016	324.109	342.914	325.477	357.814	810.539	687.809	727.129	689.924
RPS2	P15880	33674.5	28358.2	33003.4	29221.2	34144.3	36676.6	41666.7	34759	35189.5	34231.5	35187.3	35338.6	34291.2	32507.1	34254.9	31777.6
DSP	P15924	9172.77	9357.08	10940.5	7401.73	8241.58	7183.39	6557.35	6601.19	3823.09	2338.16	4953.11	5455.56	17609.6	17339.5	18460.8	18529
RPA2	P15927	1339.46	1407.84	1354.17	1255.39	2496.4	2459.94	3445.81	3092.34	2859.94	3086.35	2897.08	2910.99	2603.39	2831.02	2893.21	2796.01
CD44	P16070	7292.1	7635.94	7267.13	7443.88	9953.08	10334.5	8020.06	10517.9	5475.54	5675.79	5299.85	5482.26	902.826	885.442	1013.89	889.551
NQO2	P16083	2564.85	2478.26	2411.21	2450.97	4427.52	4812.38	3775.14	4449.86	1123.92	787.227	1260.85	1429.41	589.699	586.005	1216.46	925.212
H2AX	P16104	1469.51	1129.39	1147.19	1313.36	334.066	606.898	581.241	728.457	1500.01	1008.06	1597.48	1309.59	1954.7	2003.82	2633.14	2693.87
ITGB4	P16144	1924.84	1671.41	1745.78	1551.26	1008.26	1033.66	882.743	1349.21	3458.72	2943.98	3241.92	3351.69	501.53	415.434	466.943	406.733
CBR1	P16152	33685.7	25061.4	23639	23007.4	13747.4	15670.1	13440.8	13666.8	6510.72	5608.65	6736.4	6813.99	8061.98	8200.28	9960.78	9055.78
ACADS	P16219	1499.77	1219.41	1170.06	1222.48	381.858	491.613	453.39	276.12	1311.29	1427.4	1281.01	1357.63	448.249	501.108	590.602	545.323
CREB1	P16220	2517.47	1875.8	1641.57	1601.74	2076.04	2265.71	2169.66	2442.08	1328.73	1433.74	1475.44	1678.2	2297.41	1886.58	2574.15	2224.84
GLB1	P16278	4302.19	3183.74	3315.38	3280.56	1833.68	1944.91	1502.63	1195.38	1786.55	1650	1923.98	1878.51	1320.01	1269.65	1433.87	1435.6
PPP3CB	P16298	2187.65	1629.2	1673.72	1417.24	1457.17	1689.05	1442.85	1482.48	1822.19	1706.58	1549.89	1553.67	2083.28	2254.06	1795.05	2217.24
NCK1	P16333	1102.42	1000.98	1147.84	1001.37	1089.1	1062.56	984.565	1323.17	931.238	1102	1044.76	1069.36	1064.35	1008.51	1049.1	1118.46
GCFC2	P16383	1394.55	1127	991.56	1186.25	951.374	457.863	969.288	1157.07	262.223	412.144	91.8932	484.33	605.097	463.023	709.657	668.221
H1-5	P16401	144.408	131.757	103.867	58.6101	46606.9	43926.1	50444.6	37923	35008.3	36061.6	40727.2	40449	58591.5	61320	74092.4	56969.6
H1-3	P16402	17258.6	13619.4	11414.8	11270.4	6688.51	5745.1	6380.75	5655.15	3495.84	4227.46	4086.73	3504.31	10396.8	12067.1	12821.1	10165.7
H1-2	P16403	7615.62	4714.27	3585.58	4402.02	3875.7	4769.7	4477.48	4644.93	3205.05	3629.45	3500.13	3308.66	3751.08	4132.5	4226.69	4042.65
EPCAM	P16422	350.088	275.898	642.174	259.678	148.342	121.372	76.204	70.426	5066.1	5684.63	5830.75	5205.16	3425.67	3199.41	4521.16	3106.22
POR	P16435	19163.1	15363.6	15448.4	15977.6	2940.15	2868.28	3589.55	3394.2	5768.88	5393.6	5166.72	6003.23	5974.95	5921.86	5198	6084.01
FER	P16591	115.75	127.267	95.8548	111.46	78.6782	137.203	145.979	104.237	124.977	82.2186	123.375	114.026	92.4377	53.2337	91.6857	94.698
ATP2A2	P16615	20047.2	18371.1	16521.4	16885.4	6158.12	6857.91	6653.85	6934	9711.65	9041.52	9325	9449.43	7105.04	6962.65	7983.71	6791.64
FAH	P16930	6624.51	5435.38	5784.79	5361.32	3298.78	3249.26	3801.07	3517.05	2576.21	2314.77	2857.33	2612.67	2955.66	2908.4	2382.95	2815.48
STMN1	P16949	7493.95	5183.92	5904.94	5466.67	21292.7	23721.2	25750.1	25776.5	23267.4	24365.6	27348	23686.2	18106.2	19965.5	21329.9	19631.4
YBX3	P16989	1138.39	975.762	1501.85	1145.9	1122.62	1294.06	1575.36	1377.01	1564.62	1477.42	1301.13	1748.9	848.754	773.475	755.122	921.435
ZNF24	P17028	381.078	352.036	327.996	275.247	62.1822	356.121	325.622	378.683	432.011	277.815	331.867	398.344	396.403	492.866	584.053	386.649
NAGA	P17050	1499.59	850.181	776.678	938.801	1450.47	1501.25	893.149	648.272	325.897	421.99	487.746	455.695	968.397	1191.14	1093.63	1147.14
HMGA1	P17096	9220.08	9182.43	8175.88	9308.29	4767.62	4788.85	5832.04	6264.02	4801.9	4026.83	5322.13	4791.56	2808.96	2437.51	2912.93	3271.51
TMEM11	P17152	1118.67	1466.52	1548.76	1602.29	2206.81	2183.5	1926.85	2177.82	1666.71	1480.22	1349.94	1755.69	1025.4	1127.39	1123.83	1202.25
GOT1	P17174	10330.1	8993.33	8754.18	8600.03	6071.69	6397	5465.02	6380.05	10134.2	9661.15	11572.7	10548.4	6073.06	6064.19	6360.97	6166.08
PRKCA	P17252	4538.8	3635.28	3205.56	3549.36	1424.9	1268.51	1146.07	1195.86	806.943	769.213	940.962	784.39	299.628	403.463	391.135	410.579
JUNB	P17275	329.288	328.373	530.954	263.394	792.611	651.989	773.653	720.543	362.142	285.559	300.532	515.7	280.038	219.496	228.354	103.825
ITGA2	P17301	3026.66	2317.56	2311.78	2202.66	961.085	1132.64	1125.96	1365.46	1838.65	1559.3	1615.04	1796.55	1954.1	1838.78	2034.44	2051.13
UBTF	P17480	3553.01	3069.16	3522.96	3338.07	2220.12	2300.37	2256.27	2130.64	2744.75	3046.92	2925.15	2621.43	3206.04	3306.93	3338.95	3006.15
JUND	P17535	677.111	309.25	533.429	454.329	379.149	471.305	265.467	205.595	644.969	798.141	746.828	734.054	1003.68	609.065	651.897	796.499
ATF7	P17544	291.462	202.996	244.523	97.7161	376.919	372.727	449.508	410.072	148.949	127.204	194.526	163.932	149.527	167.77	310.534	171.806
NDUFB7	P17568	2412.06	2019.98	1333.99	1982.54	1147.15	851.464	1203.65	673.183	876.765	922.181	883.872	1058	1031.88	1124.61	1626.81	1072.94
PRKACA	P17612	1186.08	886.277	1057.79	1156.08	2051.66	1870.58	2077.17	2460.22	669.838	648.514	639.808	680.942	1938.54	1747.46	1888.95	1570.51
CAPN2	P17655	10440.5	10255.1	9049.9	9709.49	3796.23	3865.43	4175.19	4191.22	3514.66	2788.61	3397.55	3169.5	715.058	444.114	617.824	514.663
CEBPB	P17676	1650.17	1100.13	1402.6	1424.72	1724.41	2128.08	1603.39	1834.57	403.253	298.426	720.719	533.254	1131.04	1112.62	932.237	1092.95
PTPN2	P17706	411.036	305.582	493.466	337.92	299.432	271.907	297.549	438.584	373.45	252.258	321.975	428.665	617.068	478.489	551.46	398.939
CTPS1	P17812	1747.07	1679.31	1818.44	1657.46	3912.49	4243.93	3940.76	3640.8	2521.34	2826.69	2355.1	2545.2	2591.63	2513.98	2754.32	2619.18
DDX5	P17844	7658.51	6620.82	7408.39	6677.07	9257.5	9989.17	10377.3	10057.1	14108.5	13799.9	14088.7	13758.8	11170.6	11770.7	10829.1	10313.5
PFKL	P17858	2554.49	2324.37	2394.39	2259.68	2051.97	2069.91	1582.93	1803.8	3355.45	3294.14	3175.91	3342.56	8185.73	8178.08	8259.77	8220.57
GM2A	P17900	828.932	593.367	740.207	255.9	511.461	485.799	945.079	484.644	330.973	381.934	404.105	695.976	664.256	531.479	371.265	868.299
LGALS3	P17931	572.317	239.386	319.761	276.598	711.548	618.063	402.829	506.692	364.989	290.178	473.439	346.717	463.198	281.337	751.693	458.637
PSMC3	P17980	4700.28	4220.04	3960.86	4002.16	3374.86	3518.09	3519.36	3459.11	3845.18	3539.39	3471.8	3600.19	5589.32	5287.31	4687.74	5094.1
TCP1	P17987	9005.91	8236.89	8234.73	7618.15	10429	11192.5	10674.2	10475	11321	12294.3	12585.5	11610.7	7303	7198.44	7275.12	6997.26
PTPN1	P18031	1006.08	754.793	791.487	802.814	786.1	952.112	925.391	885.837	1222.65	1095.37	1141.81	1198.02	2858.5	2724.69	2559.51	2431.23
ALOX12	P18054	1074.8	431.273	1080.35	745.649	99.3646	689.432	810.369	52.2003	1045.41	863.174	131.057	773.332	699.173	592.57	781.692	543.392
ERCC2	P18074	387.29	392.958	495.988	533.667	526.99	576.53	590.265	429.654	597.469	588.997	549.942	628.917	491.901	415.159	406.303	530.293
RPL35A	P18077	10450.9	14263.2	15386.5	14653.1	15179.9	16578.3	16061.2	15343.4	18249.4	18245	19365.9	19347.2	16216.2	15628.3	14091.3	16170.9
ITGB5	P18084	3621.17	3427.18	4327.61	4197.98	1102.11	1146.06	914.941	1572.57	795.244	715.435	672.81	884.193	1527.36	1814.16	1709.87	1721.78
ARF4	P18085	6555.7	11017.3	12644.3	12402	13692.5	14229.6	13475.8	14505.7	12033.4	10184	9810.89	11601.6	7908.05	5803.75	4245.51	7335.12
RPL7	P18124	29449	23465.5	27073.1	23817.3	25119.4	26981.8	27315.2	24843.5	28833.5	28941.1	29113.9	29849.6	24751.9	23760.9	22075.9	23874.2
VCL	P18206	6610.21	12433.1	12322.8	10767.1	14544.7	16093.4	14944.4	15584	15132.4	13182.4	13018.9	16272.7	5029.12	5977.33	4885.34	6429.63
PTPRA	P18433	899.252	426.794	749.319	555.91	347.211	89.0777	91.923	275.621	217.077	244.329	118.262	227.086	101.669	130.036	320.208	221.566
NAT1	P18440	427.682	182.233	340.616	235.938	164.497	78.8068	123.396	83.3632	189.54	150.763	117.443	102.98	339.662	419.34	237.839	379.189
SON	P18583	2049.99	1354.8	1637.82	1500.2	1451.28	2290.28	1539.23	1603.56	2871.12	2297.27	2702.47	2587.6	2525.79	2334.92	2730.2	2378.1
NELFE	P18615	1379.94	933.142	935.197	1059.59	1704.13	1403.26	1441.41	1533.04	939.798	912.003	938.908	885.024	2076.07	1961.44	2117.49	1768.98
RPL17	P18621	10422.3	12734.7	16766.1	14060.7	13008.5	13234.5	13697.4	13903.2	17535	16935.5	18369.2	15731	15655.9	15086.5	13378.6	13177.8
PGAM1	P18669	33520.4	43521.6	39527.7	36780.7	44294.3	35932.4	31302.2	35634.6	39430.5	33706.6	34187.1	38300.9	56989.1	52280.1	58505.9	51070.5
RCC1	P18754	9119.06	7504.92	7494.87	7381.15	11135.2	11023.2	12119.2	9901.48	16174.2	17131.9	16756.7	14920.9	10570.1	10814.4	12653.2	11407.2
SDC1	P18827	1346.93	2417.28	2100.61	2428.85	332.259	432.609	423.279	213.291	1556.4	1226.16	993.968	1847.75	212.154	50.5995	88.4521	145.208
ATF1	P18846	760.706	295.007	290.893	257.05	634.92	688.698	768.352	788.741	267.138	381.193	347.883	263.09	358.375	371.997	327.83	369.575
LIG1	P18858	1413.83	1022.6	1112.28	1085.79	1453.19	1386.15	1406.35	1479.17	2493.34	2802.48	2502.39	2609.2	2800.96	3345.66	2897.1	3180.08
ATP5PF	P18859	40.2039	100	592.568	296.581	654.051	133.797	1116.18	926.293	86.4911	450.67	413.663	394.601	309.562	703.106	436.53	265.617
XRCC1	P18887	2594.7	1824.77	2193.21	1885.25	2085.18	2016.07	2037.2	2232.44	1810.83	1817.19	1683.08	1828.78	1855.95	1762.84	1879.64	1771.75
CDH2	P19022	398.091	177.351	168.645	214.567	627.154	1032.44	989.139	940.239	166.871	54.4422	86.7609	327.405	314.191	187.819	269.776	76.723
TSPAN8	P19075	586.768	781.688	1327.08	748.961	758.561	152.51	347.531	1590.62	3771.24	2087.94	3156.8	4161.84	109.705	109.943	136.21	55.9873
PLCG1	P19174	528.786	421.182	577.792	407.361	645.847	852.059	866.495	782.983	923.323	974.817	1016.77	998.818	1785.94	1633.3	1642.68	1757.83
UGT1A6	P19224	386.167	418.057	696.878	450.909	275.477	75.9069	95.7176	424.011	1275.64	833.412	930.025	1292.59	154.151	39.4787	94.53	147.125
CD58	P19256	810.567	606.503	545.392	602.284	781.164	743.062	442.822	915.829	451.44	246.781	401.197	416.162	411.429	488.376	585.924	385.107
NCL	P19338	76629.6	66536.9	73775.5	68313.7	57818.2	59880.6	67965.8	62056.5	82731	82271.6	89889.7	82128.3	60733.5	61933.2	58880.9	60850.3
HK1	P19367	7139.54	6300.07	6161.4	6173.98	7339.6	8338.43	8040.09	8057.93	10247.4	8869.09	9404.39	10248.6	14781.6	15515.1	15448.5	15386.6
POLR2C	P19387	1511	1590.98	1739.92	1512.15	1633.01	1434.34	1929.59	1825.48	1417.68	1425.43	1438.54	1553.01	1680.4	1718.13	1476.72	1795.41
POLR2E	P19388	4086.3	3105.07	3091.22	2375.36	2165.3	2571.29	3074.05	2346.5	2845.92	2527.73	3070.75	2364.74	2157.96	2260.67	2500.22	2275.65
NDUFV2	P19404	1576.51	576.008	831.949	709.153	652.551	564.874	396.446	332.932	325.329	518.201	595.991	375.514	518.74	674.55	721.182	698.409
GGT1	P19440	11284.1	8352.14	9203.76	9566.21	700.683	1196.29	88.2383	792.904	59.922	1515.12	110.155	118.266	321.057	391.383	324.357	236.661
ERCC3	P19447	292.524	218.227	336.47	314.994	261.901	354.347	259.72	313.78	235.225	236.807	214.244	263.918	264.197	327.767	279.444	450.149
TRIM21	P19474	1085.91	862.386	936.616	758.251	978.499	840.615	787.746	874.946	547.201	635.045	880.526	571.196	101.269	115.113	197.829	82.3566
EIF2AK2	P19525	2318.12	2488.6	2869.06	2584.23	1674.75	1657.02	1557.72	2007.12	2214.04	2255.6	2138.68	2211.85	2125.06	1821.58	1565.31	1797.18
SRM	P19623	7263.95	5992.58	5436.11	5281.11	8389.45	8154.04	8712.59	8901.44	4470.94	4554.3	4351.02	4157.14	6594.09	6248.62	5306.27	5436.48
SLC9A1	P19634	264.791	153.345	112.283	58.6128	259.995	91.6852	76.6646	169.076	132.476	123.479	256.337	177.815	275.993	204.54	285.92	239.736
CSNK2A2	P19784	1436.73	1683.03	1843.77	1735.77	1230.11	1123.35	1288.05	1470.27	1657.48	1591.85	1628.74	1628.26	2206.23	2441.18	2171.07	2015.42
RXRA	P19793	667.581	399.733	1027.63	593.476	743.009	1183.17	702.879	664.139	302.02	363.116	452.67	100.745	806.784	1128.24	993.498	1189.11
ITIH2	P19823	1248.06	1269.73	2015.26	1203.71	1778.96	2523.91	2574.15	2164.81	737.412	981.419	926.24	770.063	1219.44	1459.37	848.901	1113.21
NFKB1	P19838	623.863	846.707	1011.06	851.203	802.625	782.112	975.338	917.468	1593.29	1917.49	1554.05	1570.28	1278.4	1244.11	1271.1	1203.84
TYMP	P19971	8056.18	3984.18	4717.14	4226.72	2784.25	2755.26	3004.17	3150.48	1018.13	1125.32	1151.4	2207.98	1721.94	1506.38	1393.7	1779.56
ATP2B1	P20020	2793.87	2429.63	2491.96	2361.08	903.092	976.567	1017.36	959.821	1622.33	1532.8	1543.47	1570.39	993.654	986.397	991.825	1060.05
EIF2S2	P20042	3203.15	3178.8	3475.4	3301.58	3304.56	3450.74	3401.26	3867.75	3714.96	3766.81	3484.53	3639.57	2957.91	2986.31	2788.59	3151.79
ANXA7	P20073	11633.6	9270.57	9059.19	9380.8	5998.58	6412.79	5779.37	6202.05	6574.25	6308.05	6758.79	6844.62	7997.35	7812.59	9036.44	8116.86
TBP	P20226	234.98	130.294	243.214	213.313	366.227	100.042	1028.75	346.034	494.253	426.518	519.417	496.201	593.003	488.903	668.857	537.944
CCNA2	P20248	103.934	44.4712	141.651	65.5651	476.25	762.694	806.152	550.632	665.565	831.234	731.889	646.048	262.621	313.325	543.63	358.873
BTF3	P20290	2233.65	1959.7	2063.6	2030.82	2401.59	2341.36	2914.49	2560.67	2446.26	2656.57	2833.52	3047.15	1853.69	1966.23	1861.6	2097.52
RAB4A	P20338	2348.2	1073.51	1108.17	1213.87	811.462	907.196	898.461	855.661	502.919	489.419	614.367	567.875	639.515	488.15	491.7	656.729
RAB5A	P20339	6724.99	8000.67	7466.79	7624.16	5726.48	6327.97	6631.11	7385.94	5999.05	5860	5863.94	6268.56	10442.6	9631.02	9763.65	10257.7
RAB6A	P20340	8625	6863.49	7242.48	6864	5193.21	5677.85	4708.89	5639.12	7470.77	6679.68	7140.43	7733.78	11778.2	10120.1	11314.3	11410.8
MSH3	P20585	1041.68	843.913	877.307	839.973	815.729	1119.09	739.722	790.42	684.479	690.342	787.419	707.547	1023.48	957.96	835.944	842.399
PSMB1	P20618	3970.26	4483.32	6256.23	4826.38	4820.41	5228.63	6055.5	5874.78	4415.38	4364.4	5016.49	5009.01	5110.97	5184.96	5220.89	5498.05
M6PR	P20645	4588.83	3570.77	5023.32	3159.47	5216.42	5161.79	4973.02	5695.08	3500.97	3547.55	3373.49	3468.49	2374.11	2259.27	2487.37	2805.73
COX5A	P20674	1528.67	1256.34	682.14	690.144	1072.14	1073.53	916.144	234.771	873.841	840.638	1758.8	607.913	592.781	423.156	1028.78	106.251
LMNB1	P20700	11273.1	9157.24	10236.3	8943.3	17673	18096.7	22307.7	18905.2	18663.7	20079.4	19154.6	19392.7	24539	25755.3	28801.7	25316
BCL3	P20749	520.385	257.459	631.21	403.521	489.788	292.097	186.909	142.237	60.6262	95.6949	68.2236	100.171	196.835	226.344	493.751	109.51
CAST	P20810	14094.7	14872.3	13576.5	14658.5	25902.6	25498.8	24345.8	31495.7	5302.79	4593.53	5380.83	5184.33	1899.17	1962.54	2636.31	2420.43
IMPDH1	P20839	791.214	760.681	759.053	825.375	835.808	869.12	825.382	711.11	1276.9	1137.87	1190.79	1186.52	1271.5	1192.28	989.912	1179.38
FLG	P20930	759.725	876.559	1082.04	540.357	1073.65	1418.11	2139.54	1491.18	427.3	855.857	692.203	828.294	1138.18	925.921	643.573	904.472
AGA	P20933	3215.56	2269.25	1267.95	2037.93	1996.55	1974.05	1001.48	1436.26	60.7082	115.414	114.361	139.568	1250.53	1380.09	1307.33	1018.22
RASA1	P20936	724.321	413.399	432.843	541.409	284.829	447.066	436.493	383.852	1176.48	1375.17	1388.72	1234.98	818.001	630.118	752.819	726.406
PTMS	P20962	20820.4	17731.2	14713	18288.7	19259.5	19783.9	22012.3	18707.9	2938.99	3045.36	3353.48	3387.53	2818.56	12196.3	14071.8	13885
CDK11B	P21127	1025.53	955.623	1214.78	1069.13	1686.08	1799.9	1629.34	1764.27	1973.68	1942.26	1969.88	2040.55	1307.74	1265.77	1290.43	1272.85
GSTM3	P21266	365.689	1097.89	535.687	339.445	4558.57	4791.33	4233.12	4473.29	98.2859	53.8169	155.153	2038.36	25800.9	29117.8	27360.6	26594.5
ATP6V1B2	P21281	5102.7	3745.45	3880.03	3790.52	3429.83	3342.67	3670.96	3831.28	4516.4	4857.3	4803.03	4884.66	2403.45	2297.25	2549.8	2012.15
ATP6V1C1	P21283	1123.2	951.691	1055.49	908.859	660.81	766.314	600.719	803.875	1161.74	1063.71	976.056	1104.14	1504.2	1398.25	1325.69	1324.22
CSRP1	P21291	3383.12	4481.94	5465.56	4115.2	6905.85	6836.07	4792.47	5699.64	1877.67	1625.98	1738.94	2080.5	4150.54	3789.68	4298.97	4900.4
FLNA	P21333	34441.7	39485	44016.8	39498.6	57842.9	56961.1	55103.3	55365.9	12139.5	12434.9	11225.2	12717.2	20531.9	20118.3	18327.5	21887.2
NF1	P21359	456.009	393.73	482.423	428.372	364.987	462.303	391.433	359.161	228.657	181.78	196.122	178.993	331.18	335.834	307.645	241.862
MAOA	P21397	3120.96	2554.35	3379.26	3195.96	1826.73	2051.42	2000.53	1862.35	1187.56	1103.96	807.236	1462.41	1974.78	1953.1	1557.98	1659.39
ACO1	P21399	9806.67	7679.01	7597	8170.78	7139.64	6778.99	7307.77	8192.42	4324.38	3768.31	3780.34	4208.25	2829.07	2583.27	2734.45	2806.4
NT5E	P21589	3516.98	2288.56	2461	2470.49	269.491	303.703	171.414	358.013	752.233	554.566	979.553	712.467	181.297	157.963	438.891	112.608
TAF1	P21675	156.203	101.302	120.48	227.169	256.032	271.163	347.58	235.378	221.516	314.161	356.547	257.115	329.451	326.579	207.933	349.844
VDAC1	P21796	33076.7	28808.6	29301.3	26954.8	34431.1	37186.4	34640.4	36668.9	23461	21425.4	24713.2	25770.9	29635.3	33282	32867.1	33004.8
ERBB3	P21860	515.783	348.165	475.04	395.202	3986.12	175.393	72.4543	63.4107	132.486	196.65	173.096	213.135	441.235	404.35	526.981	416.253
SDHB	P21912	5116.86	5836.06	6308.63	6553.55	5143.92	4595.69	4817.29	4245.51	4578.33	4182.55	4114.08	4599.98	3907.87	3902.02	3431.85	3931.86
CD9	P21926	1575.04	1984.03	1661.39	2035.34	1695.07	1742.52	1777.89	2474.73	3443.54	2679.86	2539.17	3874.06	3656.39	4468.91	4112.71	4334.62
BCKDHB	P21953	381.924	190.68	298.552	207.774	308.261	304.589	436.107	283.903	243.247	316.161	402.673	484.23	230.446	226.98	262.297	183.694
COMT	P21964	2153.86	1806.75	1564.63	1640.03	995.37	1058.19	830.674	802.917	1237.58	1280.45	1185.97	1194.47	4956.04	6066.58	7339.46	5889
TGM2	P21980	29895.5	26559.9	26149.7	26827	1573.58	1836.6	1663.2	1881.96	263.558	529.054	2016.82	252.923	1397.05	75.3708	356.618	217.599
MMUT	P22033	1687.27	1428.8	1769.01	1838.45	1982.1	2479.68	2231.52	2248.95	2271.47	2412.14	2528.57	2249.83	2417.24	2925.64	2710.56	2857.83
OSBP	P22059	1371.06	1295.06	1446.9	1357.56	848.777	929.082	897.625	1056.41	1646.75	1538.11	1649.86	1519.53	960.577	901.361	825.083	942.385
PCMT1	P22061	263.287	307.769	870.225	437.349	2451.18	1222.62	1511.05	647.841	985.802	1604.1	1313.57	932.809	2040.99	2478.65	2466.03	2033.13
FBL	P22087	3431.46	3525.29	4219.01	3986.19	3028.81	3160.73	3545.7	3016.24	4988.73	4414.63	4677.43	4805.69	3261.27	2692.83	3115.53	2638.46
GART	P22102	4824.34	3742.63	3621.93	3659.48	6050.82	6003.56	6003.92	5964.21	5916.72	5832.23	6122.34	5853.38	5016.97	5203.23	5285.66	4980.41
CDH3	P22223	1668	1388.49	345.05	645.156	116.233	93.101	278.682	152.058	1113.44	1579.63	1373.68	1557.19	534.811	623.001	841.311	526.328
PAICS	P22234	16541.8	12685.3	11873.1	12209.2	22011.6	23720.7	21863.4	21969.4	23234.8	23500.5	23424.5	23727	24431.8	22100.6	22638.7	22399.7
SCP2	P22307	4344.94	4374.72	4907.82	4489.48	1960.28	1610.13	1592.9	1528.03	3382.61	3149.33	4029.2	3190.02	2446.6	3093.24	2842.74	2501.73
UBA1	P22314	20701.5	16769.2	16399.7	16230.5	17910.9	18537	18766.8	19930.4	14951.4	15718.1	16033	15500.4	18463.8	18359.4	19494.5	18691.4
NME2	P22392	34381.8	41771.5	50201.1	45175.4	42287.8	40137.1	43000.9	47650.1	44809.5	40348.8	51789.9	47735.3	66940.8	70144.8	58924.9	72247.7
FDXR	P22570	7472.7	5856.52	6543.9	6133.61	1977.61	2290.01	2033.45	1939.69	3216.15	3566.73	3545.88	3134.3	2747.62	3044.57	3082.04	3086.42
HNRNPA2B1	P22626	92797.8	94143.7	96850.9	92060	89510.5	101611	122257	95460.1	78346	85682	86913.7	78248.7	87143.8	90603.3	93819.9	90073.5
RFX1	P22670	737.507	528.763	386.347	532.709	548.769	844.854	884.466	602.327	498.347	389.336	456.21	419.847	379.126	310.822	814.234	435.835
CBL	P22681	282.854	268.254	111.814	350.822	289.733	262.813	299.376	92.8633	346.916	446.14	403.29	535.281	360.618	354.214	422.727	484.177
IGFBP4	P22692	2273.62	2896.44	3411.37	2520.76	1232.04	2733.74	1927.65	91.1728	680.31	89.3435	83.9771	143.435	725.559	1240.91	659.829	874.065
PRKACB	P22694	668.297	751.321	835.665	735.519	670.868	807.194	1105.41	769.577	64.0351	119.483	80.1892	109.976	398.169	400.521	346.838	524.363
UQCRC2	P22695	4028.42	4734.01	5254.7	4947.3	4355.48	4036.01	4638.44	4275.36	4707	4273.99	4687.83	4615.55	3360.78	3517.93	3891.18	3480.59
TGM1	P22735	1448.58	1476.2	1640.41	640.303	1881.24	2188	1481.27	2108.74	547.626	582.62	1296.55	1314.59	713.578	1100.09	826.306	1171.21
FECH	P22830	2520.62	1947.48	2222.91	2240.2	1376.17	1447.99	1461.49	1039.93	560.896	365.208	494.498	490.474	1647.65	1522.22	1269.5	1172.37
LHCGR	P22888	577.822	371.838	344.314	630.45	631.496	452.586	291.475	343.786	63.6001	536.811	639.52	570.412	420.503	587.954	554.118	334.006
XPA	P23025	223.21	176.25	221.326	264.32	548.587	626.148	711.749	415.452	675.078	565.113	705.866	479.749	566.727	522.662	668.953	549.106
FBLN1	P23142	1332.57	929.762	1015.08	838.156	615.701	876.526	815.638	810.03	147.898	201.155	62.2296	78.3611	346.577	298.616	328.112	277.435
TCEA1	P23193	7080.92	5589.36	5287.37	5652.79	3818.52	3597.74	4083.53	3954.03	7164.27	7387.11	7846.95	7288.2	3983.07	4137.61	4285.96	4163.53
ITGA6	P23229	2658.98	2140.97	1967.14	1973.42	2469.68	2754.8	2368.07	3122.7	7274.97	6675.81	6645.79	7599.51	261.526	172.788	205.223	816.781
SFPQ	P23246	30154.9	25595.7	26272.4	26298.3	27754.7	27030.3	30102.8	28127.9	25558.5	26586	24965.5	24445.2	24560.9	25046.6	25751.1	22540
TUBG1	P23258	1905.02	1652.15	1750.57	1601.56	3021.22	2912.66	2829.28	2939.36	2439.31	2519.62	2338.32	2381.34	1753.97	1742.21	1744.52	1984.34
PPIB	P23284	24705	28237.4	28684.1	28172.3	29556	27614.8	23866.5	29828.1	15963.5	15567.2	16696.4	16528.5	16090.2	15282.5	14027.8	15051.6
ME2	P23368	3735.77	3317.46	3143.64	3520.08	2550.86	2684.9	2758.29	2657.37	1561.75	1524.91	1407.56	1586.56	443.278	405.665	454.397	526.138
WARS1	P23381	2423.71	2872.87	2875.08	2919.97	2972.16	3089.38	2208.73	3905.21	2517.99	2352.64	2267.25	2387.57	3133.86	3001.44	2870.08	3198.25
RPS3	P23396	23765.2	29659.4	28285.7	27574.1	30478.4	34675.6	35168.7	31907	28347.6	29126.9	30173.8	29473	28089.4	28128.2	26651.3	28918.8
RPS6KB1	P23443	411.98	300.235	520.617	494.307	536.933	355.535	491.538	573.099	264.273	345.197	362.975	297.641	4371.06	3716.48	4496.64	3906.07
JAK1	P23458	781.286	361.401	608.913	621.416	358.416	479.16	500.954	592.807	509.725	531.868	634.585	328.776	578.491	469.002	517.24	383.069
PTPRD	P23468	1540.1	632.872	745.246	770.938	110.512	181.149	229.387	159.596	360.419	289.456	263.724	365.563	1334.34	1538.87	1438.17	1441.27
LORICRIN	P23490	1397.71	5466.92	2117.98	742.961	7165.86	11470.6	2193.02	3868.42	1694.48	1784.61	8798.75	1346.08	1998.73	2488.41	7593.53	2370.12
SP100	P23497	386.766	451.082	426.204	256.335	270.849	454.326	329.492	326.097	219.835	131.793	214.23	237.986	94.7239	79.6001	59.2062	206.312
NFYA	P23511	1204.73	515.619	126.993	494.963	599.772	637.975	449.856	571.171	642.932	680.244	586.056	507.761	876.46	1025.84	1050.37	698.022
AHCY	P23526	31949.4	27326.2	27533.9	26815.4	20420.1	20897.2	19532.8	20114.2	35239.1	38459.1	37406.7	36645.8	25089	25180.6	24556	23527.1
CFL1	P23528	229701	203236	192615	179860	156730	166284	176982	170760	136448	138763	162665	144788	213801	208679	241393	200675
EIF4B	P23588	12366.1	10629.2	11958.5	12150.5	13211.9	14771.3	14854.3	13099.3	12986.3	12944.8	13304.4	13364.7	16215.2	15543	15066.1	16349.6
F8A1	P23610	764.052	244.256	279.35	163.596	361.211	384.924	261.25	269.666	164.792	156.647	95.827	224.125	730.323	753.026	709.087	670.832
ATP2B4	P23634	597.31	556.785	420.985	443.225	989.23	929.87	928.001	1016.38	379.464	110.965	122.266	162.455	325.844	316.235	487.344	278.281
DGKA	P23743	302.733	413.519	570.602	492.457	740.848	892.054	576.256	598.212	72.0041	46.7118	80.3964	70.0966	337.66	267.641	341.233	447.629
CPT2	P23786	1102.92	961.227	1208.43	1133.19	1366.69	1434.11	1387.94	1273.05	1931.47	1985.08	1909.45	1984.94	1311.8	1484.35	1534.36	1461.99
DTYMK	P23919	4205.57	4077.81	4831.43	4421.43	4858.6	4739.22	5378.06	4938.23	3250.84	3306.48	3535.99	3489.01	3074.14	3029.31	3036.77	2975.24
RRM1	P23921	2009.09	1837.47	1961.11	1903.35	7275.3	8047.26	8358.3	7964.8	3002.83	3235.91	2832.93	2769.27	3776.35	4031.67	3558.89	3679.9
COX7B	P24311	620.629	694.272	1441.28	1315.06	1373.34	1336.04	1089.13	997.488	1768.14	1504.47	924.138	1969.95	1194.44	1237.94	666.709	1415.12
CCND1	P24385	62.2696	368.465	123.464	460.763	994	133.719	113.113	123.926	176.595	662.48	111.492	472.899	2169.49	1942.98	1803.29	1696
CHM	P24386	754.299	670.872	728.339	125.043	1106.33	369.845	83.6051	158.653	314.939	521.118	249.604	418.216	86.0673	700.728	1007.55	380.28
KDELR1	P24390	273.284	1921.46	1429.58	1457.68	1556.15	2780.61	1380.91	986.434	1247.96	1204.62	691.834	1302.46	1649.45	1173.03	1576.41	1384.02
EEF1B2	P24534	2880.9	2176.27	2365.71	2020.72	3090.08	2507.35	2576.25	2868.71	4761.33	4709.5	5739.61	4158.49	1073.7	2083.88	1715.75	1894.92
ATP5PB	P24539	3639.88	4456.07	5417.63	5865.07	5516.06	5651.74	6404.9	5900.88	4374.35	4118.46	4256.41	4908.07	4329.05	4539.91	4129.63	4402.41
TBXAS1	P24557	908.943	742.029	785.849	934.93	118.984	302.781	207.094	150.835	345.086	218.653	284.346	372.445	107.401	362.164	158.034	85.9083
ACP1	P24666	4388.01	3846.33	5581.22	4502.22	3588.71	2826.36	3521.07	2218.99	2159.87	2417.9	2742.3	2086.5	2370.67	2905.71	2776.71	2710.32
ACAT1	P24752	8588.04	7360.38	7848.91	7412.77	7263.65	7961.88	6529.77	6862.16	11299.9	11346.1	11492.3	11366.9	6308.33	7571.97	6795.96	7648.93
POLR2A	P24928	1999.37	1381.52	1628.84	1565.28	1695.39	1855.53	1897.73	1737.13	1784.63	2109.71	1895.58	1862.96	2278.39	2262.29	2283.14	2135.38
CDK2	P24941	1017.16	721.451	1218.74	1135.47	6348.81	6597.26	6423.94	6264.71	3306.83	3320.38	2857.58	3223.45	6137.08	6471.65	6170.26	6361.43
GRK2	P25098	410.228	310.312	544.372	380.888	423.084	496.476	501.16	633.676	1251.04	1258.75	1287.35	1314.37	901.905	851.458	726.371	879.559
MCM3	P25205	4104.84	3599.11	3602.3	3412.47	11372.7	11810	12379.5	11990.1	8926.51	9385.61	9512.13	8552.57	11925	13756.7	13411.2	12831.8
AZGP1	P25311	673.154	1716.97	1501.06	620.92	1254.1	1862.78	1986.92	1986.27	611.434	978.663	1003.08	1160.26	728.381	1019.87	552.927	1331.24
MPST	P25325	9157.53	6734.4	7916.63	7855.59	2441.27	1854.06	2503.24	2104.44	3553.09	3479.82	3309.61	3398.23	1986.45	3016.49	3219.2	3356.61
RPS12	P25398	5484.32	4937.86	5200.94	4952.32	5384.64	4488.22	4797.9	4102.6	5174.96	5906.35	8059.51	5076.61	3750.34	5018.28	6741.9	4359.33
BRD2	P25440	533.042	607.936	465.011	422.993	647.836	593.102	530.638	618.089	751.942	754.629	824.003	769.652	665.759	663.09	784.664	750.241
FAS	P25445	784.218	396.147	525.75	345.457	525.851	545.363	455.914	506.469	252.802	272.462	177.843	289.349	117.202	92.7358	151.965	232.623
YY1	P25490	1341.64	1134.29	1116.57	1206.98	1120.83	977.128	1013.25	1066.45	1590.65	1515.73	1491.44	1611.99	2160.57	2410.27	2332.63	2398.29
DNAJB1	P25685	2848.2	2867.63	2952.42	2884.18	3425.48	3332.71	4252.03	3903.18	5636.45	5479.65	4733.98	5797.6	3841.95	4156.82	3521.9	4344.49
DNAJB2	P25686	324.47	327.026	683.709	221.873	60.8745	272.807	284.451	259.199	298.834	83.6012	212.827	383.934	725.074	555.398	523.386	847.76
ATP5F1A	P25705	79639.5	72064.6	72256.9	73564.1	82985.9	84885	92058.5	82216.2	56231.3	55963.3	62668.4	58509.9	58766.6	62352.8	61392.6	62987.1
PSMA1	P25786	21477.8	19712.8	20653.6	19935.2	21136.4	21607.9	22851.5	23628.9	20036.4	19069.5	22230.7	20250.1	22600.5	22680.2	22617.7	24273.5
PSMA2	P25787	6265.24	4690.87	4443.72	4667.68	5368.3	5503.34	5056.42	5449.95	4753.74	4278.81	5093.09	4464.37	4859.49	4822.55	4661.82	4600.31
PSMA3	P25788	6375.18	7233.74	8180.69	7292.58	6801	7007.11	7249.35	7886.96	7258.61	6563.09	7866.91	7677.94	7977.32	8603.12	8210.24	8199.24
PSMA4	P25789	9503.6	11206.9	10380.1	10591.2	12352.3	12521.5	11182.8	12985.9	12281.3	11160.7	11851.5	11986.3	11592.1	12467.4	13303.1	13683.7
S100P	P25815	408.923	674.21	665.847	373.248	74.7508	186.392	290.453	119.573	237.219	199.601	380.993	463.702	77.4422	68.4442	90.7329	116.856
NFKBIA	P25963	104.484	247.643	398.168	184.34	348.511	300.643	229.034	401.617	290.392	236.319	248.289	138.384	171.674	287.818	289.778	344.509
ITGA3	P26006	20432.1	18338.5	17302.9	19061.5	12067.6	11163.6	13629.7	15726.6	1226.33	677.767	675.432	1392.84	2870.02	3135.76	3142.65	3466.84
MSN	P26038	17804.6	14550.8	13935.5	13677.1	17473.8	18218	24873	22826.2	2110.19	539.882	1514.46	2115.3	579.416	2313.7	1425.58	1248.74
DDX6	P26196	4083.67	2871.17	3258	3008.48	2356.04	2738.26	2336.53	2448.78	3498.84	3642.48	3694.4	3575.31	5335.08	5267.09	5159.37	5375.37
CTNNA2	P26232	9284.55	3658.57	2831.8	2964.92	2160.61	2126.14	1627.87	2166.43	2760.42	2875.25	2393.07	3034.27	3659.02	2838.82	3605.68	3131.66
DNMT1	P26358	604.971	519.622	618.743	626.107	2005.35	2104.77	2522.77	2072.73	2767.14	3070.64	2849.84	2711.61	2214.89	2439.91	2038.34	2221.28
U2AF2	P26368	1528.08	1594.59	1646.46	1588.16	1606.33	1795.64	1436.69	1538.51	2015.21	1959.48	1703.12	2159.92	1760.2	1868.06	1817.1	1854.89
RPL13	P26373	21356.7	20966.7	22295.2	22138.8	23887.7	23197.2	26143.9	23516.5	24850.4	26939.4	27852.6	25927.2	22888	22020.5	21718.9	21267
CHML	P26374	87.6449	273.355	925.181	405.054	541.219	676.098	787.107	491.549	274.221	379.896	353.41	458.423	386.084	370.485	286.74	376.378
ELAVL4;ELAVL2	P26378;Q12926	1516.02	735.971	899.284	859.899	1136.41	1352.33	789.68	1024.53	1372.79	1306.98	1062.01	1080.1	1346.82	1347.7	1821.14	1055.87
IVD	P26440	1102.78	821.65	752.276	812.933	2241.34	1975.55	2131.6	2015.02	1783.21	1938.31	1843.27	1708.74	2895.66	3355.78	3375.06	2817
S100A4	P26447	63379.5	47118	45143.2	45665.8	36212.8	48118.3	18356.5	24660.8	715.444	1298.64	1069.06	918.963	196.526	485.457	256.492	244.68
MGAT1	P26572	830.532	660.978	602.677	600.872	60.9143	249.242	411.903	66.1744	439.099	494.1	391.629	487.982	432.302	353.55	380.519	375.64
HMGB2	P26583	1742.61	1953.18	2304.45	2267.53	4041.77	3887.26	4712.87	4679.61	3879.62	3633.67	3672.93	3665.45	5406.93	5364.61	5761.32	5470.48
PTBP1	P26599	12232.8	12122	10601	11132.5	11438.2	11709.8	10493.8	11219	11631.1	12429.7	11818.1	11533.3	9244.65	9096.91	10835.8	9652.78
TARS1	P26639	10195.6	8389.44	8642.75	7929.21	22340.7	23618.8	22455.4	23731.7	9645.76	10497.2	10232.5	9527.39	9527.36	9310.6	9697.95	9226.38
VARS1	P26640	6068.52	5650.64	5807.37	5581.86	5885.84	6326.74	6210.99	5883.27	3263.76	3557.46	3479.98	3326.44	3374.44	3674.3	3721.85	3766.53
EEF1G	P26641	18131.4	19058.4	19255.4	18524.3	25671.3	27811.8	28336.5	29521.8	37581.6	34334.3	37905.1	36303.6	17506.9	17248.7	16369.4	16816.8
FKBP2	P26885	9362.55	8585.09	8289.96	8144.06	8120.6	9191.02	8060.81	9998.89	3399.41	3940.51	3818.34	3766.1	4914.1	5034.79	5226.81	5191.63
STOM	P27105	3506.12	2553.28	2919.69	2313.83	3517.16	3753.68	3626.26	5902.61	116.308	42.31	134.22	124.444	1130.63	975.484	902.428	997.804
AK4	P27144	2973.04	1999.28	3053.84	2768.41	2402.7	1452.7	1680.69	1241.6	2589.34	2233.4	2558.18	2434.06	5019.32	4871.12	4623.46	4592.12
ANXA13	P27216	8534.16	10109.6	11448.7	9216.33	3623.85	2673.38	124.744	3092.35	2624.08	1188.56	1686.48	4240.5	1707.83	1292.49	1293.97	1708.27
YWHAQ	P27348	20194.4	20619.4	19704.2	19042.3	11695	12861.1	10950.6	12526.7	10053.2	9792.1	11064.9	10841	12802.7	14008.7	15525.1	14065
MAPK3	P27361	1562.5	1496.23	1479.57	1549.04	990.978	1117.48	1392.29	1146.8	470.566	508.219	789.278	663.09	5133.63	5211.69	4944.73	4851.3
MARK3	P27448	1578.85	1004.17	986.894	977.669	757.28	809.138	707.726	703.911	881.204	747.349	830.706	793.579	1415.3	1587.84	1584.57	1386.93
ATP6V0C	P27449	465.327	963.936	1401.76	905.394	1437.23	796.434	1847.02	1372.21	1100.19	925.656	1094.03	2147.66	1133.94	1049.34	2279.3	2707.23
CALML3	P27482	1548.11	1069.68	1074.78	654.374	786.827	1140.81	2010.87	891.693	771.506	761.633	1069.15	3167.23	4713.18	845.816	1032.23	1256.66
DPP4	P27487	755.632	24.4146	102.897	375.168	114.81	133.902	81.5674	74.8742	1400.37	1298.33	1215.96	1304.52	24.9768	238.308	668.979	95.5212
RPL10	P27635	14469.9	13276.5	14797.5	13375.4	13187.8	12357.5	14731	12685.8	16908.7	17840.3	18271.7	16076.9	14885.6	15610.4	15597.9	13613.6
RPA1	P27694	2146.7	1777.13	1993.65	1801.55	3571.7	3443.18	3895.77	3823.76	3732.1	3616.18	3823.96	3605.95	3930.97	3764.2	4225.27	3770.84
APEX1	P27695	11439.4	12228.1	12425.4	11852.7	8740.32	9053.01	9323.94	9850.91	9214.27	8392.03	8815.26	9146.51	8833.52	9472.61	10650.4	9695.97
DCK	P27707	749.449	477.848	574.68	685.198	1259.89	930.592	1409.69	1521.96	1266.47	1517.23	1527.89	1554.97	1767.48	1755.78	1855.53	2035.45
CAD	P27708	9935.51	8097.19	8197.57	7674.22	8953.16	9378.46	8784.01	7518.43	7206.61	7926.52	6866.68	7137.86	5731.28	5820.75	5815.56	5676.82
CALR	P27797	24411.6	25252.2	29837.6	25118	39121.4	42155.3	38445.2	44535.9	26161.5	22176.8	23566.6	24869.1	24230.2	23863.8	21282.2	22626
MAP4	P27816	7106.11	6012.71	5881.51	5823.78	7039.27	7386.7	6718.27	6537.32	5715.26	5462.28	5219.5	5249.09	4502.74	4111.89	4328.39	3912.45
CANX	P27824	17210.1	20008.1	24345.5	22640.4	16507.2	17205.4	18160.7	18246.3	17170.2	15249.4	14783.6	18534.6	17395.2	17901	16654.8	17401.1
PIK3R1	P27986	227.776	202.985	151.787	192.471	199.961	142.405	28.8639	140.07	473.844	473.074	497.594	494.298	576.396	543.026	511.547	449.08
PSMB8	P28062	996.841	1241.99	1334.63	1316.52	2678.27	2996.43	2661.13	3646.4	1904.02	1730.59	1859.92	1871	149.683	116.238	67.6771	65.2016
PSMB9	P28065	599.907	683.735	425.721	140.247	1135.43	1373.76	603.04	1178.49	1104.43	893.301	1361.61	1058.75	78.3874	60.6732	70.3026	112.232
PSMA5	P28066	11287.7	9085.87	9689.57	8859.05	11332.2	11704.5	10809.4	11462.1	9842.61	10240.5	12331.2	11353.6	10440.4	11650.1	13615.9	14477.9
PSMB4	P28070	6422.54	5069.75	4456.79	5155.6	6253.77	5480.5	6157.66	6300.13	4527.43	4586.51	5736.87	4964.65	5850.04	5532.34	5239.12	5770.27
PSMB6	P28072	11880.7	9639.85	9939.13	9602.41	10678	9866.33	10026.8	11563.3	10637.7	9801.27	12254.8	11825.7	11308	12552.7	12299.2	12761.4
PSMB5	P28074	4868.31	4836.21	4917.48	4584.16	4449.03	4663.56	4564.48	4406.4	4502	4357.43	4997.1	4506.72	5852.91	5926.52	5958.28	5971.85
ABCD3	P28288	2917.97	2558.01	2796.12	2569.61	1471.78	1582.24	1517.78	1377.57	1555.53	1119.63	1120.22	1524.68	1291.06	1453.6	1246.1	1358.84
ITPRID2	P28290	860.976	539.294	685.332	624.83	865.822	882.125	933.042	960.198	365.063	278.203	380.413	383.159	428.125	409.289	413.876	326.554
NDUFS1	P28331	13939.2	11786.3	10930.8	11858.6	6816.05	6519.06	5998.16	5878.06	6714.58	6493.12	6553.66	6815.85	8657.8	9867.14	9119.49	8690.45
ADH6	P28332	4544.09	9234.85	8410	9195.42	2020.24	2645.45	3238.75	3070.55	2866.97	2696.4	3042.24	2407.18	3013.19	4339.23	3415.89	4074.57
POLD1	P28340	1066.12	744.721	971.296	863.896	2011.09	2113.78	2056.01	1947.6	2002.48	2072.71	1938.32	1989.23	1418.44	1471.95	1511.57	1455
TEAD1	P28347	316.688	463.989	712.799	695.184	734.173	1014.66	655.257	833.027	374.834	249.474	432.4	473.736	369.381	305.543	363.72	385.227
SMARCA1	P28370	1551.77	1371.74	1633.49	1661.97	893.948	775.16	1330.67	1231.14	150.053	328.606	351.389	355.72	896.8	129.078	57.0616	316.24
MAPK1	P28482	2627.11	2630.19	2511.28	2647.72	2039.78	1894.77	2020.38	2336.29	3081.7	2858.03	3127.27	3156.49	2521.48	2328.21	2207.67	2515.53
RXRB	P28702	83.6467	327.59	347.542	237.558	183.719	106.128	364.702	275.995	104.838	58.4739	145.857	104.522	264.233	327.554	315.086	313.808
ERCC5	P28715	275.617	313.821	274.204	224.754	260	176.666	384.012	250.42	232.573	276.302	242.909	260.779	137.851	138.063	103.294	108.757
GRN	P28799	515.306	489.541	744.414	597.606	679.982	580.007	379.491	825.178	926.469	679.251	782.942	897.093	969.159	718.062	1067.51	895.863
LAP3	P28838	4742.22	3488.61	4011	3799.12	3535.66	3653.66	3616.92	4788.57	7313.81	6700.95	7570.62	7308.17	6218.88	6125.29	5643.61	5382.08
GTF2E1	P29083	1266.97	674.235	679.494	760.009	1014.92	1145.8	682.561	895.058	908.745	877.401	1140.53	944.999	848.048	754.136	934.689	908.657
GTF2E2	P29084	672.183	449.095	441.152	471.787	562.309	552.402	425.442	434.901	676.391	660.68	625.473	699.058	566.874	518.558	451.812	648.116
TPP2	P29144	2642.6	2290.31	2224.78	2082.49	4376.18	4067.9	4163.41	4749.24	3248.59	3218.67	3266.15	3100.33	2251.46	2088.13	2187.93	2032.38
IMPA1	P29218	7056.12	5798.05	4289.52	4978.3	2318.85	2453.01	2204.53	2333.45	2798.6	3374.84	3641.74	3000.87	982.376	909.591	978.822	1014.32
EPHA2	P29317	631.259	350.521	440.933	344.878	221.161	265.002	196.285	306.498	766.166	547.713	549.917	783.863	138.223	84.8029	111.829	159.408
PTPN6	P29350	1783.6	1155.87	1362.39	1275.45	282.113	243.968	125.553	313.139	683.5	616.818	843.986	742.561	1999.56	1823.65	2046.09	1801.42
SHC1	P29353	586.053	701.336	891.485	719.244	515.624	657.145	732.964	519.228	525.595	429.291	352.116	471.983	500.149	389.197	499.897	525.455
MPG	P29372	1010	932.307	989.749	890.422	1271.04	1082.85	1196.74	1047.24	571.018	742.242	676.915	663.912	1669.12	1558.46	2058.95	1589.35
CRABP2	P29373	76.9178	659.557	110.312	338.865	746.969	720.027	602.618	593.003	468.393	1939.03	45.1344	648.155	11716.4	12474.9	16829.8	18645.6
ARID4A	P29374	663.091	235.431	803.637	581.296	364.664	684.776	194.131	389.41	569.973	599.629	791.718	501.773	719.507	645.773	612.599	696.83
TKT	P29401	199481	183393	189002	182189	129695	134741	145937	142251	50895.4	43848.2	50838.2	49876.4	44793.4	39618.6	43672.5	39238.3
SERPINB3	P29508	652.982	1346.81	2348.03	585.722	1254.7	1679.76	1579.89	2091.56	487.639	736.494	1203.14	2828.93	1260.44	918.705	634.257	2396.34
RBMS1	P29558	1240.82	819.877	601.785	725.596	1446.14	1724.97	1104.6	1207	500.44	540.669	478.202	344.452	429.482	411.29	521.531	452.08
PML	P29590	764.783	512.596	556.661	427.839	1295.59	1218.6	1377.02	1440.96	604.425	674.887	671.059	741.976	313.214	307.942	350.587	294.71
EEF1D	P29692	54810.5	45903.2	45589.8	44441.9	60456.3	68481.5	65462.1	66286.7	55837.2	59546.9	63500.7	56933.4	33865.3	34083.9	33593.8	34305.8
MARCKS	P29966	5670.09	4962.93	7886.57	5822.25	5529.18	6640.64	6955.4	5383.55	2459.73	2437.3	2074.21	2900.37	1233.08	702.59	509.764	717.543
GNA11	P29992	1993.19	1475.76	1937.25	1474.95	1239.43	1512.81	1068.66	1328.76	1780.04	1895.65	1787.65	1982.63	266.4	429.297	335.139	375.279
ALDH4A1	P30038	2673.89	2059.21	2305.25	2320.35	567.061	517.64	564.939	469.457	1479.47	1717.62	1650.05	1312.68	9903.47	10445	9420.07	8986.94
PBLD	P30039	2333.51	1477.74	2264.04	1839.16	73.9513	181.558	54.9243	72.0181	297.288	344.468	142.714	116.541	386.346	646.786	423.017	605.187
ERP29	P30040	14738.8	9352.43	9680.68	9437.63	16459.7	16018.4	15478.8	17468.7	19391.2	19594.4	25861.7	20672.8	16316.6	20768.8	19946.9	19073.6
PRDX6	P30041	19678.7	19065.4	24242.8	20575.3	32866.8	31792.5	36182.4	33508.6	17698.7	18118.4	19741.8	18055.6	19193.5	22794.3	24052.8	24002.3
BLVRB	P30043	20195.6	20043	27122.6	23992.5	3193.54	2972.55	3159.19	3225.15	1808.82	1527.81	1461	1865.05	8826.19	9712.34	8783.56	10727.1
PRDX5	P30044	7951.44	8003.74	13815.9	10460.3	14504.2	12097.2	13551.6	10793.3	6021.22	6035.38	7681.47	6322.54	7138.03	7863.53	6947.44	8213.46
DDT	P30046	203.52	406.391	741.363	893.966	1534.69	868.816	793.105	696.24	1492.35	1391.72	2045.35	1137.37	330.139	408.694	714.173	789.201
GCHFR	P30047	733.403	356.732	321.389	476.562	1136.1	1239.51	1064.9	1528.89	335.115	235.891	372.134	254.139	595.363	772.671	899.798	882.126
PRDX3	P30048	14674.6	9074.42	14177.2	11108.8	10418.1	7412.48	7205.53	5656.85	8734.91	9513.67	11074.6	9013.88	4043.33	6747.77	7015.59	6253.96
ATP5F1D	P30049	25.0267	211.407	99.1774	427.62	1416.93	932.717	1732.81	319.249	171.642	105.979	111.138	230.064	92.4002	220.735	200.771	86.3493
RPL12	P30050	30514.3	24894	27446.7	24351.2	28659.3	29269.9	29952.2	28455.9	30813.6	29720.3	32590.4	27843.4	25414.6	24408.8	28293.6	23742.6
ECHS1	P30084	4592.84	4716.38	5376.1	4975.45	4172.66	4710.07	4703.93	4407.98	5493.93	5175.18	5546.87	5435.29	8529.56	8812.23	8270.5	9033.05
CMPK1	P30085	8902.95	7274.49	7299.77	7755.58	5927.05	4852.97	5002.5	6052.87	5377.93	4541.75	4559.86	5259.17	4289.11	5107.17	5522.29	5188.56
PEBP1	P30086	18468.1	20412.8	22134.4	21706.9	19349.2	19874.2	20759.3	20576.7	23862.7	20722.5	23014.4	24003.7	27499.5	31770.8	32528.5	36199.8
PDIA3	P30101	35904	32663.5	31601	32766.1	42037.9	41517.4	43093.9	48799	35278.6	31652.1	34290.4	36483	24675.6	23477.4	22569.1	24034.9
PPP2R1A	P30153	16365.5	15376.1	16588.7	16243.5	14083	14071.1	12597	14193.9	17558.4	17329.5	17809.3	18302.4	19177.5	19036.9	18699.8	19123.1
PPP2R1B	P30154	597.143	507.863	349.124	434.822	522.647	377.156	499.987	514.481	922.597	849.775	918.433	784.356	628.628	484.258	478.746	576.947
CDC27	P30260	4355.94	5434.61	6050.39	6170.44	8068.24	9418.77	7535.41	9069.98	4044.91	3751.82	3806.95	4469.24	5468.43	4663.29	5388.76	5210.15
PPIF	P30405	3901.99	3244.3	3355.56	3013.66	3461.74	3754.97	4229.29	3348.97	5205.09	5585.83	6198.94	5702.82	3011.77	3448.18	3602.9	3022.32
NKTR	P30414	110.67	79.5581	179.279	237.907	432.256	443.025	450.184	304.351	336.72	313.214	349.429	289.221	383.799	372.656	419.87	375.217
NMT1	P30419	5397.78	4831.36	5372.41	4809.08	4904.39	4987.61	4898.71	4780.05	4224.41	4174.72	3911.33	4080.54	2667.43	2865.6	2384.6	2790.12
HMOX2	P30519	2646.44	1774.99	1792.37	2048.42	1288.24	1211.2	1280.78	1170.31	3046.96	2649.29	2599.03	2633.39	2935.16	3204.01	3057.23	2902.48
ADSS2	P30520	11323.3	6084.43	6684.58	6728.13	5647.9	5925.46	5828.59	5817.68	8520.92	8725.98	8555.18	8401.25	3336.88	3449.74	3331.56	3702.87
LRPAP1	P30533	1230.41	1255.72	1449.06	1388.51	3814.35	3892	3493.81	4195.1	1854.78	2064	2068.55	2089.26	2225.17	2086.09	1693.15	1922.42
TSPO	P30536	3206.47	5475	4629.39	5347.3	4020.31	4591.39	4773.88	5118.94	4774.44	4541.19	4836.97	5178.18	3708.44	1416.25	1899.47	3505.42
ADSL	P30566	3259.17	2658.82	2815.44	2479.72	4023.7	3325.3	3494	3760.66	2460.56	2398.65	2553.9	2325.5	2726.69	2919.47	2819.58	2521.6
CLIP1	P30622	5655.58	4899.68	5705.4	5613.8	3068.01	3129.48	3179.87	3115.82	2811.24	2876.54	2516.63	3018.36	2171.48	2241.41	2042.87	1947.24
SRI	P30626	157.283	557.935	647.717	561.456	1988.87	1532.02	1822.64	970.33	455.433	315.846	617.641	447.32	235.459	77.8619	548.434	368.472
SERPINB1	P30740	8982.09	9904.92	10079.3	8147.17	3066.41	3205.82	2831.21	3630.81	5060.43	3951.17	3674.94	4704.54	3230.46	3598.63	3762.33	3857.31
SLC7A1	P30825	396.312	404.253	435.338	320.759	1160.63	1920.05	1416.64	1832.89	1395.04	1628.29	1523.16	1518.59	1056.14	934.594	1159.27	1137.63
ALDH1B1	P30837	3119.82	2895.32	2796.71	3042.98	3454.16	3284.94	4194.38	3631.31	4343.64	4171.7	4303.91	4144.9	882.562	901.56	867.567	740.176
ALDH3A1	P30838	131394	159849	138305	139324	12267.1	12009.9	18353.8	14914.2	6109.83	5394.14	5592.39	5585.2	392.265	75.8382	113.599	63.8907
POLR2B	P30876	2175.54	1754.03	2028.06	1966.75	1986.41	2153.02	2317.89	2300.3	2122.29	2204.52	2186.24	2062.57	2394.36	2344.63	2377.43	2209.46
LCN1	P31025	407.414	538.317	165.869	77.1887	247.829	555.133	433.075	621.494	56.9033	735.945	268.091	219.857	155	282.716	196.608	207.771
SDHA	P31040	4569.1	4643.21	5084.06	4933.99	6742.51	6704.83	7277.61	6370.34	3498.73	3563.26	3356.77	3711.65	5092.29	5843.63	5208.04	5618.46
CORO1A	P31146	61.7705	99.8558	83.0899	44.1958	85.866	456.212	149.765	70.8722	256.04	298.5	311.411	318.149	773.914	470.791	470.941	464.841
GDI1	P31150	2807.01	2486.07	2153.08	2371.25	1527.33	1652.97	1409.9	1605.83	1194.53	1070.56	943.54	991.825	2674.6	2349.7	2623.63	2366.86
S100A7	P31151	349.763	868.976	986.319	247.731	485.843	956.994	1557.08	964.598	322.206	490.275	1234.79	910.939	1048.7	597.325	340.537	1015.82
MAT2A	P31153	10269.1	9160.82	9125.61	9115.23	9570.99	9434.07	10817.5	11151.3	10186.6	9571.52	11390.7	9461.3	8958.19	8117.38	8147.29	7118.75
PRKAR1B	P31321	2130.41	2214.52	2474.97	2620.17	4610.5	4164.54	4944.62	4551.48	1721.64	2038.37	1350.85	1411.04	3178.93	3553.64	3255.5	2585.74
PRKAR2B	P31323	3082.19	923.813	1223.16	1040.07	1137.32	1099.55	1102.04	1093.66	1021.22	958.027	1335.83	1185.93	2076.14	2054.61	1744.6	1772.48
CPS1	P31327	10814.6	9790.1	11414.9	10398.3	13500.9	14136.9	13042.9	14439.7	1169.52	1013.54	670.855	1558.87	989.953	977.82	1017.11	1386.76
RRM2	P31350	1132.88	1060.56	1605.95	1597.49	3112.7	3341.25	3010.21	2946.14	4075.64	4789.95	3385.63	3806.36	8165.58	7072.24	6540.2	6675.89
TIA1	P31483	3794.56	3031.52	3268.19	3447.19	2537.84	2895.2	2468.11	2836.43	3339.87	3463.95	3098.77	3528.26	3195.76	3542.11	3170.43	3207.22
SLC6A6	P31641	1202.81	630.74	1345.43	720.199	1153.55	1141.28	1074.88	1192.18	256.952	333.859	347.293	409.873	554.276	696.018	677.389	866.71
DNAJA1	P31689	5075.64	3975	4709.89	4463.5	7348.09	7821.05	9797.61	9366.93	4854.62	4430.04	4527.29	4784.21	2884.53	2837.34	2334.7	2636.45
AKT1	P31749	695.928	862.618	884.816	669.85	430.09	404.046	454.02	617.63	397.603	387.695	427.281	423.727	2236.77	2407.83	1959.35	2268.37
AKT2	P31751	2214.42	1934.93	1599.99	1776.5	998.617	1122.33	974.727	982.976	902.117	823.473	763.141	1065.15	1709.53	1844.55	1791.42	1673.85
UQCRC1	P31930	17985.1	16530.1	17777.7	18659.8	16271.2	16906.8	17916.1	17010.3	15809.6	15704.1	16226.3	15805.2	11205.7	12103.6	12603.2	11790.4
HIBADH	P31937	6173.52	4693.7	4821.59	5146.19	3801.54	3090.43	2614.77	2935.5	2311.94	2161.49	2371.63	2336	1979.69	2651.26	2675.51	2484.97
ATIC	P31939	20254.6	17953.7	17764.5	17860.5	13247.1	14048.6	14781.7	14937.8	12928.1	13400.4	14259.6	13043.3	17901.9	17992	17690.2	17924.2
HNRNPH3	P31942	6733.51	4137.7	5087.68	4285.25	4540.58	5573.24	5690.44	3907.66	3726.65	5525.07	4714.55	4492.1	6056.35	6814.33	6975.36	7085.97
HNRNPH1	P31943	29242.1	23861.5	21399.8	21523.4	24798.3	28484.7	25778.4	21583.8	21791.1	24890.7	24887	22419	19222.7	20587.8	23753.8	18771.9
CASP14	P31944	1449.52	2144.8	2217.45	1659.45	2370.73	2780.47	3166	3525.31	917.72	1358.85	2075.77	1955.18	3091.08	2123.31	2182.31	3427.79
YWHAB	P31946	58858.8	54622.1	63684.2	56461.8	48408.1	53683.7	50035.1	53269.9	49575.8	47758.6	51699.7	56089.5	69034.4	64590	63083.3	73029
SFN	P31947	16947.7	16395.5	17191.3	17782.5	12088.4	12261.8	13258.3	15105.9	13738.9	11750.8	12236.5	14549.9	13796.2	16274.7	17648.6	18050
STIP1	P31948	13926.6	17071.5	19568.1	18700	17625.8	18678.4	19877.7	17433	27106.6	26498.8	25109.9	26805.4	22020.7	21633.7	19408.8	21400.8
S100A11	P31949	61811.7	43126.8	44080.2	40112.9	32812.3	40327.8	17397	21854.8	39993.9	42548.4	31376.3	46643.2	32909.8	45193.6	66080.6	64021.1
L1CAM	P32004	99.3061	253.37	89.7396	135.762	2547.73	1961.97	2962.65	2415.72	79.7212	100.519	46.6053	129.738	285.119	235.275	408.215	266.559
PRDX2	P32119	636.704	835.644	878.474	423.369	28307.3	23850.1	24446.8	26936.5	24889.1	25108.3	29757.9	26639	25038.9	34216.5	33248.6	33206.4
ARRB2	P32121	518.637	786.592	649.778	638.103	435.806	279.165	480.473	354.498	395.748	327.23	389.356	369.995	342.82	248.739	289.23	363.26
GK;GK3	P32189;Q14409	351.231	597.932	887.123	887.173	840.842	797.276	1032.35	1064.35	414.431	86.2176	568.236	608.459	474.048	162.804	101.288	513.563
DCTD	P32321	1489.3	1341.22	1233.38	1040.84	867.544	919.448	1072.57	936.742	1325.92	1191.76	830.092	1159.69	433.879	315.736	408.007	714.543
PYCR1	P32322	1679.68	1451.03	1342.63	1236.38	1788.01	1844.8	1823.12	1480.68	2699.73	2993.64	2515.96	2578.96	3189.18	3201.62	3490.44	3258.62
GBP2	P32456	881.454	663.698	875.661	794.796	2139.95	2238.33	1872.87	2106.42	701.938	86.7321	140.124	337.478	765.969	641.101	817.611	694.825
ELF1	P32519	440.425	285.809	324.076	300.205	197.198	124.634	168.255	95.6179	318.115	263.588	254.267	261.681	606.66	499.551	927.585	644.722
CTH	P32929	685.885	362.223	475.16	386.352	294.018	378.986	168.381	404.33	3364.36	2301.03	4751.85	3444.09	145.074	86.2203	177.572	199.849
RPL9	P32969	12234.2	13760.3	13551.4	12419.3	13726.5	14128.5	16049.2	15102.1	15639.6	16420.4	17156	14532.5	13705.3	13619.3	13626.6	12544.3
TNFSF8	P32971	182.178	827.541	1178.71	898.107	601.445	771.93	690.013	960.581	481.667	707.908	231.577	667.889	610.112	696.939	169.293	102.491
ACSL1	P33121	1361.64	1347.58	1136.54	1188.57	748.125	826.791	877.289	848.306	5017.79	3927.22	3979.47	5012.7	593.956	509.957	444.129	400.001
KIF5B	P33176	4927.02	4348.87	4796.52	4884.18	3563.31	3884.21	3951.87	3962.76	5218.67	5202.47	5026.43	5220.85	5732.88	5352.07	5399.34	5688.58
CSTF2	P33240	1936.71	1436.57	1592.95	1421.51	2659.63	2206.36	2478.37	1917.47	1827.19	2331.69	3197.02	1811.68	302.64	1168.25	2015.42	1287.62
DUT	P33316	400.759	342.795	480.929	259.636	1708.29	1493.12	1789.87	1346.87	488.982	506.008	504.512	434.56	371.586	537.574	498.373	606.633
ABCC1	P33527	4100.65	3068.55	3324.09	3273.61	1422.27	1420.01	1431.18	1684.51	432.536	478.998	466.477	458.907	439.099	390.616	535.578	423.562
ABCD1	P33897	197.751	96.7173	93.196	106.794	709.268	912.34	899.378	800.86	88.3681	72.2491	108.763	87.6075	750.464	583.651	523.124	621.892
TTK	P33981	77.3112	293.257	106.862	162.156	572.76	517.838	557.372	436.593	614.131	570.963	412.137	607.334	562.503	409.589	538.182	563.083
MCM4	P33991	3409.4	2764.39	2996.53	2855.64	9169.79	9125.32	9766.6	9447.03	6955.68	7642.01	7555.82	6889.97	10049.8	11155.3	10795.8	10137.7
MCM5	P33992	4367.26	3327.13	3156.84	3240.16	10364.6	11244.1	10227.2	10014.4	7852.79	8297.68	8458.6	7842.68	11270.4	12337.9	12254.7	11772.5
MCM7	P33993	3755.05	2905.49	3261.68	3039.72	9164.86	9048.57	9795.44	9381.35	7295.56	7673.67	7748.05	7046.83	10884.3	11654.3	10861.1	10802.6
GALNS	P34059	772.98	445.296	507.3	591.355	311.401	243.088	229.928	339.857	291.011	288.599	222.558	309.353	395.526	372.425	403.438	336.319
SHMT1	P34896	1849.88	2118.4	1744.77	2170.55	3618.79	3547.24	3492.91	3645.06	2806.65	2862.51	2805.34	2759.06	4167.05	4459.71	4860.26	4373.24
SHMT2	P34897	12144.9	9264.87	8830.26	8672.06	13454.9	14832.2	14423.1	12664.3	20343.6	21474.9	21410.8	20556.4	18436.1	19444.5	19068.6	19107.3
EPHX2	P34913	1220.53	1175.73	1261.31	1270.25	130.089	105.655	163.775	89.8511	228.751	175.279	244.439	271.631	178.784	102.973	187.86	300.962
HSPA4	P34932	8334	8412.54	8792.45	8716.66	7582.35	8299.25	8269.01	7948.87	10425.6	10786	10665	10566.5	10873.3	10823.7	9566.65	10516.2
MPI	P34949	3294.06	3207.9	3172.08	3151.08	1705.95	1851.84	1529.21	1576.67	1412.66	1296.07	1150.41	1424.89	1581.8	1952.67	2160.95	2033.24
GPC1	P35052	1203.9	826.019	995.573	822.642	1150.31	1164.8	1110.7	980.681	366.867	471.442	412.615	356.918	420.619	316.334	368.831	417.801
PFN2	P35080	7108.65	5511.99	6173.42	6067.68	3779.99	3706.82	3111.71	3477.97	1201.27	1207.19	1154.99	1269.93	10251.6	11152.5	11328	11998.1
CTNNA1	P35221	8963.66	6953.28	6731.35	7058.19	4201.44	4247.03	3928.91	4316.73	6278.97	5926.26	5860.95	6033.42	6961.93	7060.17	7750.73	6981.83
CTNNB1	P35222	3173.36	2553.01	2509.26	2504.22	1016.35	1111.72	822.601	864.782	3765.98	3706.72	3634.4	3398.13	2431.75	2799.71	3049.65	2665.79
PHB1	P35232	32740.9	20791.9	30458.5	26356.1	27204.1	24569.2	25392.9	23755.2	32838.9	34102	35090.5	32182.5	22337.1	28100.3	26229.2	29551.7
SERPINB6	P35237	2431.87	2356.34	1880.37	1822.88	2748.51	2896.44	2813.14	3165.66	1437.55	1325.54	1024.74	1132.26	3159.61	3491.34	3792.58	3555.63
NF2	P35240	146.271	304.176	266.786	462.777	238.106	325.773	301.437	100.178	214.816	241.099	251.273	205.971	322.318	286.853	270.237	183.367
RDX	P35241	71814.7	61259.7	63852.1	65874.9	79855.2	80890.7	76841.9	87011.4	33961.2	25842.5	30813.6	31872.1	20197.9	20241.9	18379.2	21326.4
RFC4	P35249	1582.79	1096.51	1265.91	1296.21	3347.25	3371.42	3378.08	3085.66	2127.28	2395.44	2354.45	2095.07	3121.83	3141.98	3175.26	3260.59
RFC2	P35250	1469.77	1323.62	1644.06	1443.12	3667.57	3340.01	3594.09	3300.36	2136.39	2223.82	2060.5	2010.03	3190.13	3466.64	3234.31	3111
RFC1	P35251	926.001	657.008	767.138	972.639	1837.29	2115.85	1844.69	1649.34	1012.65	1065.48	1003.13	1135.21	1341.54	1521.43	1507.44	1361.71
RPL22	P35268	9103.89	5750.38	5256.76	4887.67	6793.99	6071.97	5848.85	5770.23	4715.15	5090.28	6809.31	4598.16	6784.8	6606.77	7364.65	6538.84
GTF2F1	P35269	2271.34	2024.73	2428.21	2110.07	2781.43	2917.96	3528.51	3652.99	2388.75	2512.95	2460	2488.72	2266.71	2083.97	1957.22	1996.56
SPR	P35270	6612.19	4546.91	5366.01	4801.14	1855.24	1362.37	1632.6	1401.48	2559.44	2885.16	3042.66	2387.05	3529.08	3761.21	3530.03	3592.96
PTGS2	P35354	417.631	435.095	385.416	455.104	751.377	664.791	505.111	962.705	196.388	216.904	188.358	201.497	93.2816	135.483	131.391	156.517
THBS2	P35442	54.8449	612.485	241.91	86.8724	266.109	117.286	70.2737	351.083	1977.1	2026.4	2215.18	2451.85	222.409	177.676	141.984	261.235
IDUA	P35475	852.917	626.152	561.216	933.234	543.747	700.638	496.746	249.719	48.2757	135.376	347.34	98.7253	237.257	173.439	240.339	97.2812
CBS	P35520	61.7871	258.22	290.881	159.107	3058.01	3020.85	3401.36	3011.13	78.693	156.549	105.085	175.461	1387.39	1516.69	1630.89	1608.95
IRS1	P35568	869.582	509.48	559.847	668.207	65.7978	149.714	88.7093	324.492	79.3938	235.588	273.856	272.329	693.379	690.074	876.696	879.866
AGL	P35573	1993.56	1330.84	1646.83	1437.75	1736.8	1965.84	2084.36	2040.45	2134.01	2303.34	2207.97	1947.36	1093.4	1012.55	1103.85	1015.14
MYH9	P35579	12218.7	10317.1	10197.1	9985.41	10431.7	10059.4	10805.4	10867.8	11662.1	10055.2	10547.2	11360.4	610.55	421.489	410.621	484.686
MYH10	P35580	10555.9	9264.52	10427.6	9908.5	15517.3	16227.1	11853.3	13703	17876	16709.4	18417.8	18360.4	9050.85	9171.94	9773.17	8991.67
COPB2	P35606	8120.38	8334.69	9051.48	7979.4	5885.68	6333.18	5346.46	6188.91	6954.73	6476.96	6800.21	6544.19	9530.33	9476.4	8623.91	8713.37
ACTN2	P35609	5740.76	2450.62	7898.84	3951.16	2025.89	2353.65	2670.98	4080.73	1618.35	1519.31	2452.68	5164.89	1171.59	1017.33	816.447	2823.08
SOAT1	P35610	108.884	790.101	983.604	1026.76	428.519	338.172	414.027	537.444	105.128	89.527	124.662	277.236	129.231	122.885	84.042	331.251
ADD1	P35611	2304.62	1724.11	2018.79	2030.13	1880.05	2079.41	1844.16	1831.47	2636.95	2773.62	2708.17	2569.45	748.679	668.409	683.434	825.336
BSG	P35613	8573.08	7568.98	8293.61	7672.33	24471	21954	21719.8	23574.8	14901.7	14474.2	13219.3	16543.8	3829.3	3978.39	3795.14	4722.99
FUS	P35637	6522.46	7597.39	13301.6	9533.59	11527.7	12907.9	15351.7	12224.7	11940.6	11218.8	10602.5	12656.7	12711.1	11374.5	9772.94	12077.8
NUP214	P35658	3711.57	2509.37	2791.57	2556.13	3562.54	3352.18	3654.01	3488.77	1949.81	2005.79	1955.66	2003.37	2374.55	2036.65	2709.9	2386.55
DEK	P35659	7576.67	5794.83	7066.31	6150.56	8177.25	8850.62	8477.45	8350.55	5255.85	5465.83	5726.48	5338.61	9287.13	9338.4	10129.7	9943.92
MYH11	P35749	5207.93	5214.2	5500.43	5484.03	5320.52	5420.32	6110.35	5618.48	6401.01	5629.33	5295.68	6065.94	1424.34	1494.65	1299.09	1750.27
PPM1A	P35813	1949.2	1449.49	1409.73	1505.01	585.839	737.275	583.639	616.398	673.747	686.473	593.967	652.121	1475.42	1642.95	1639	1561.89
AHR	P35869	523.914	258.262	232.052	212.677	188.942	85.2858	93.795	80.571	1204.19	1305.51	1175.09	1016.31	167.025	211.97	221.272	261.251
HMGCL	P35914	2534.53	2024.12	2065.59	2540.57	1586.37	1278.3	1281.69	1397.19	2061.19	1965.59	1884.02	2161.42	2332.09	2587.5	3130.46	2617.92
PSMC2	P35998	8805.34	8554.23	9179.22	8138.84	6948.27	7657.43	7925.04	7399.69	8087.07	7797.73	7805.79	8341.06	11247.7	10259.3	9909.81	10391.1
ARL2	P36404	2025.01	2570.73	3032.89	2440.95	2368.8	2575.8	2301.4	1882.27	1666.79	1776.6	1642.37	1999.19	2535.76	2210.34	2447.83	2681.31
ARL3	P36405	6445.09	6368.54	6674.79	6042.33	5922.59	5729.48	6147.06	6582.58	2348.04	2551.24	2516.46	2766.1	7657.48	7086.42	7288.47	7621.73
MAP2K2	P36507	3711.53	3705.26	3819.33	3885.41	3736.15	3651.65	3990.22	3541.42	2850.58	3203.58	2921.04	2983.57	3914.33	3742.02	3800.67	3941.76
ATP5F1C	P36542	10209.4	11967.5	13672.6	12030.4	12216.3	12824.8	14070.5	12646.8	10866.4	10668	11667.9	10582.5	10982.6	11279.6	11379.1	11528.6
ATP6V1E1	P36543	1972.3	1626.9	1725.5	1537.33	1390.04	1512.1	1313.9	1358.31	1678.18	1697.24	2011.05	1880.63	1252.59	1118.34	1251.84	1019.57
CPOX	P36551	5583.6	3780.55	4216.26	3653.95	1258.46	1602.88	1566.32	1430.74	6452.52	6312.68	6274.26	6901.84	2181.99	2067.63	2110.99	2150.9
RPL4	P36578	36823.4	29970.5	36697	31767.2	32958.4	35360.4	33193.2	31768.9	40858.1	42677.3	41255	40611.5	34697.9	34425.8	32924.4	32101.9
NUDT1	P36639	210.448	307.467	573.459	427.733	1102.63	849.859	760.995	705.278	716.263	647.32	710.477	925.582	677.825	890.568	583.407	1003.42
LONP1	P36776	3500.51	3213.67	3157.84	3385.37	3904.88	3999.22	4172.87	3674.07	8967.19	8532.94	8815.31	8522.66	4157.89	4291.88	3841.53	4288.35
PGM1	P36871	5191.52	5083.62	5343.06	5444.67	6556.21	6569.38	5594.67	6474.53	4843.5	4367.64	4616.95	4868.86	3901.95	3289.16	3627.96	4148.79
PPP1CC	P36873	2187.64	2486.93	2464.86	2180.23	1450.49	1641.19	1703.52	1711.52	3280.15	2990.53	3058.93	3159.38	2299.63	2620.89	3342.65	2477.19
TGFBR1	P36897	87.5584	180.589	110.74	97.3933	101.738	52.1481	170.008	145.426	165.548	124.86	199.643	107.145	213.141	108.216	134.502	72.5216
GNL1	P36915	5941.55	3913.63	4158.27	4427.21	5522.98	5365.81	4352.95	5159.59	4344.05	4698.2	4792.7	4559.3	9458.84	8815.62	9943.58	9964.71
SERPINB5	P36952	1187.77	1628.05	2909.75	1094.52	15732.3	15571.2	16280.9	20962.8	8535.96	7464.75	11556.4	8089.07	1041.08	711.967	1251.57	1932.25
DLST	P36957	8599.56	6452.55	6348.76	6772.78	5682.59	6407.24	6582.36	6663.15	7933.76	6816.24	7544.61	8400.02	5996.9	7327.88	7160.37	7570.05
GPX4	P36969	112.752	247.822	120.285	654.053	1017.63	1240.47	138.183	525.128	72.7854	240.37	268.978	103.706	163.479	263.249	1119.72	547.143
HSD17B2	P37059	217.078	204.03	463.729	247.776	51.1363	287.958	369.133	404.131	942.149	748.833	543.118	1034.14	98.8685	143.646	330.945	110.595
SRP14	P37108	10706.4	8555.34	8775.4	8123.49	11533.3	12042.7	13330.6	12185.8	7215.2	7504.56	8488.55	7047.33	6217.42	5995.66	6821.37	6112.91
NUP62	P37198	546.478	814.39	1041.21	785.806	1149.82	611.705	661.32	840.879	902.765	805.42	931.857	782.323	412.372	822.074	938.078	704.222
HPCAL1	P37235	2006.95	1594.9	2141.97	1623.37	1274.49	1345.91	1135.47	1246.52	275.198	227.653	81.872	240.299	1124.79	1402.78	1181.32	1570.47
FDFT1	P37268	1337.23	1171.31	1435.36	1420.16	1473.54	1702.72	1217.19	1422.56	5998.79	3944.81	2849.39	5994.18	4554.43	3799.93	2509.82	3807.42
TAGLN2	P37802	11955.1	10356.9	12348.8	11191.5	10409.4	7834.46	8726.86	6323.58	4728.08	5402.23	8268.53	4883.13	4627.87	6097.68	6748.65	5855.47
TALDO1	P37837	91115.8	88395.2	86132.3	84126.7	22747.4	24200	25269.6	24990.9	25468.5	25385.7	26137.2	24589.1	26299.3	26227.1	27172	25570
ETFB	P38117	29942.4	27169.4	27198.2	27230.6	12480.1	14221.2	15073.3	13107.4	19652.9	20450.7	22530.9	21271.2	16012.2	16527.7	17729	17007
RBMX	P38159	8497.77	7294.21	10407.1	8848.77	12315.7	13760.9	14075.1	9240.44	11886.1	14098.6	11000.4	13298.3	13560.5	9218.36	13946.7	9495.27
BRCA1	P38398	365.043	166.555	108.163	87.583	206.631	194.546	149.703	146.446	173.28	226.028	198.012	237.635	173.718	85.0526	204.493	82.1283
COIL	P38432	273.668	245.513	241.569	245.619	182.553	246.71	355.02	313.003	308.913	286.557	347.363	341.369	422.3	377.749	375.465	576.223
GGCX	P38435	1276.13	939.31	925.455	1004.03	763.441	881.961	534.217	721.296	372.679	283.039	393.146	270.919	435.665	489.437	455.33	436.456
ITGAE	P38570	1410.58	1147.96	1332.11	1238.65	1479.82	2079.72	1777.38	1492.28	1930.01	1690.99	2131.16	1921.72	1116.07	1157.4	664.907	938.689
LIPA	P38571	793.848	615.259	465.029	627.568	508.037	164.301	507.944	258.24	330.045	276.135	333.581	255.01	427.685	371.608	241.197	307.43
ATP6V1A	P38606	5748.34	5688.69	5584.17	5903.46	6925.58	6983.98	6980.68	6746.29	5331.15	5601.63	5327.03	5471.35	3496.73	3548.49	3210.2	3315.62
HSPA9	P38646	42095.8	36092.5	39843.2	35723.9	36551	41044.4	43139.5	36722.7	45069.3	45399	46004.2	46597.8	41121.7	40387.7	37201.3	44252.3
EIF4A3	P38919	6007.7	5180.65	5862.15	5022.4	5836.04	6262.16	6236.2	6660.22	7412.9	7271.58	7231.33	7469.43	6593.28	6840.19	6684.77	7198.81
IGHMBP2	P38935	81.5091	141.451	171.47	153.306	197.787	299.273	116.939	206.562	286.861	260.363	213.462	215.109	264.871	258.859	174.75	268.662
RPS19	P39019	23260.6	20127	20769.8	19901.5	18467.1	19501.7	21482	20746.9	17868.6	18604.2	19945.3	18491.6	19811.6	20038.5	19269.1	18198.3
RPL3	P39023	14907.6	14490.1	15286.6	14437.4	16801.3	16512.7	16715.6	16055.1	21592.9	20390.1	21918.2	18880.6	17041.2	16816.5	17974.6	14951.7
DDOST	P39656	16719	12565.7	13714.6	12643.3	10010.3	10419	11778	11850.5	11356.6	10938.1	11414.6	12070.1	13472.6	12469.7	11212.5	12087.9
ANP32A	P39687	18966.4	24163.2	20270.4	15916.2	13199.4	13777.2	14002.8	16436.2	20626.1	19783.5	30832.2	22670.1	8166.25	8858.93	11403.5	9965.59
FEN1	P39748	5277.35	4615.82	5335.45	4982.07	9807.87	10501.1	11061.9	11709	6881.36	6514.1	6805.01	6804.52	8990.19	9270.56	9474.69	8933.05
CUX1	P39880	565.654	235.694	334.487	268.101	574.725	411.892	382.611	270.962	268.848	346.15	264.972	296.534	605.405	453.575	610.196	586.395
CAPG	P40121	6290.87	5059.82	4756.81	4803.3	3718.96	4380.14	4029.55	4647.69	1911.06	1606.27	1719.92	2061.91	806.894	559.922	753.455	697.693
CAP2	P40123	1209.16	1318.73	1212.71	1372.32	646.095	550.08	713.414	607.905	83.573	100.841	148.284	127.549	2135.61	2313.18	1820.58	2216.21
IL6ST	P40189	247.28	316.104	83.6183	462.088	361.712	475.877	302.85	647.61	245.132	243.256	192.69	129.608	102.017	80.521	94.7974	58.6533
TXLNA	P40222	1431.84	1271.2	1445.99	1355.1	2267.27	2133.31	2291.84	2473.27	2146.7	2416.54	2237.97	2136.33	1606.68	1514.14	1397.84	1449.22
CCT6A	P40227	17667.8	15966.1	14277.7	14713.4	18994.7	20260.4	20183.4	19211.7	19567.3	21064.4	22302.7	20590.9	13102.4	12675.9	12693.6	12701.9
NNMT	P40261	2088.61	2449	2936.29	2870.41	3816.18	3638.32	4241.4	4341.42	1700.16	898.937	112.072	1316.77	438.316	686.607	996.188	1988.99
PSMB10	P40306	556.607	558.46	763.729	709.894	382.485	361.721	512.652	470.833	633.26	580.638	697.6	673.327	171.837	92.4234	93.6859	110.903
PBX1	P40424	699.309	395.379	467.116	317.096	1846.17	1792.94	1833.5	1385.61	185.708	138.936	188.954	143.519	585.349	571.878	602.177	408.57
RPL13A	P40429	24062.1	20254.4	20652.1	18842.2	22263.9	21034.4	22355	21043.7	26086.4	27337.1	28336.7	26309.5	23288	23233.4	21785.2	20764
ARL1	P40616	584.597	1703.08	1828.1	1667.2	790.494	1155.44	814.044	934.154	1785.22	1682.85	1451.63	1578.85	2065.86	1961.47	1625.97	2114.43
MLH1	P40692	1390.42	2626.35	2265.93	2405.73	3138.24	3239.85	3359.65	3691.2	3723.59	1817.83	3249.88	3667.17	3259.44	3505.61	3259.25	3253.66
STAT3	P40763	1496.25	1106.09	1014.33	1175.94	1997.75	1694.97	2045.71	1936.86	686.706	676.992	716.291	673.343	704.193	644.868	699.589	636.76
USP8	P40818	2302.84	1665.59	1820.45	1806.27	1337.59	1238.37	1316.45	1434.82	600.578	601.775	578.152	672.974	4301.38	4154.83	4506.6	4025.62
MDH1	P40925	38909.4	37411.5	34657.2	36286.7	22248.8	23536.8	22543.4	22552.1	32789.1	31852.5	36206.7	33106.4	26320.7	24744	27487.3	23650.4
MDH2	P40926	72676.6	53072.4	49489.5	49492.3	34374.3	39314	35773.8	35750.6	50615.4	49558.2	57382.8	52111.3	38140.9	41852.9	46493.6	40846.6
RFC5	P40937	1786.37	1287.24	1448.73	1447.4	3162.67	3473.89	2877.98	2862.23	2151.08	2352.16	2163.94	2038.19	3169.33	2872.4	3120.18	3198.19
RFC3	P40938	1040.25	796.252	1026	872.825	1724.18	1857.99	1841.17	1880.83	1359.87	1398.08	1414.91	1504.2	1904.17	2013.5	1833.7	1991.52
HADHA	P40939	15763.7	14480.1	14020.5	14146.4	8095.16	8566.15	8881.59	8424.09	8884.95	8987.39	9571.5	9600.41	9538.46	10047.9	10819	10209.9
EIF2S3	P41091	8270.21	9283.87	9403.95	9246.83	9881.82	10042.5	11010.6	10730.4	9959.61	9521.8	9395.53	9306.89	8856.54	8697.28	8528.54	8829.66
CETN2	P41208	1489.05	1156.29	856.649	972.635	1102.15	1245.45	1069.18	970.785	773.24	761.722	558.438	621.353	1734.43	1764.59	1701.51	1649.96
ETV6	P41212	106.827	126.725	176.829	251.314	216.627	148.977	124.156	387.452	532.927	439.997	335.363	430.928	140.259	148.976	75.8561	55.3769
EIF2D	P41214	1119.01	748.46	808.9	828.216	635.769	765.859	580.399	698.526	714.901	634.459	670.767	652.138	792.801	828.753	793.866	782.371
BUD31	P41223	421.002	944.201	953.563	1005.21	1406.57	1222.37	1171.38	1165.27	1617.04	1366.58	1363.8	1356.35	1311.63	1152.63	1063.57	1162.17
NAA10	P41227	3679	3565.4	2902.45	3438.71	3598.82	3566.89	4192.05	3936.64	3975.07	3759.37	4046.14	3095.6	4443.35	4328.02	4377.08	3961.1
KDM5C	P41229	189.638	139.778	204.298	106.991	82.4087	91.2244	251.249	198.178	210.531	140.836	218.369	194.404	304.012	166.201	218.104	300.645
PPP1R2	P41236	10799.1	11323.7	12912.6	10527.5	12861.2	12661.8	13324.3	14257	9999.32	10126.3	10826.8	9719.91	31771.3	27824	38717.2	29465.9
CSK	P41240	2538.34	2276.39	2551.67	2283.54	1071.95	1133.01	1423.79	1190.15	2471.91	2501.67	2711.51	2378.23	2384.21	2712.97	2288.79	2489.6
PNPLA4	P41247	768.867	432.908	440.344	391.345	417.937	413.404	364.892	334.889	322.622	264.899	405.472	319.8	349.525	326.663	258.59	279.5
GARS1	P41250	6317.24	5479.38	6487.13	5729.77	4564.17	5224.29	4841.55	5038.55	7688.22	7362.07	7570.63	7368.2	5417.56	5174.25	4927.34	5305.03
IARS1	P41252	6244.13	5471.29	6134.9	5810.06	6060.43	6659.64	7362.31	6921.97	4988.89	4843.83	5098.01	4930.7	6680.38	6384.97	6081.29	6626.87
SLC19A1	P41440	130.054	106.552	92.7147	300.42	202.788	207.506	139.552	278.256	492.283	411.595	463.312	496.463	336.763	356.49	315.832	349.632
EIF1	P41567	3232.09	3563.46	5270.56	3995.94	2862.63	3274.15	3684.02	3257.08	3086.88	3505.52	3292.5	3081.31	3787.97	3020.43	3206.05	2772.89
PRKCI	P41743	650.552	473.29	531.792	475.614	620.858	551.245	544.156	517.857	1394.6	1255.63	1013.72	1245.12	1162.42	1194.59	1458.37	1073.57
ACTR1B	P42025	867.199	743.124	939.01	861.102	561.844	704.617	426.539	560.279	514.41	509.514	483.083	473.331	750.871	874.377	800.029	819.349
ECI1	P42126	3696.62	2297.4	2756.97	2422.19	2561.94	2616.41	2225.34	2083.11	1393	1324.55	1899.26	1664.73	1629.14	2212.19	2570.42	1829.91
TMPO	P42166	2752.02	2135.35	2659.4	2349.46	2430.6	2646.56	2900.03	2392.79	7086.82	8628.61	8155.75	7874.18	3932.45	4560.73	4437.1	4313.92
TMPO	P42167	74252.1	51197.8	57900.1	54788	61694.5	56349.4	69031.6	62965.9	83873.5	91209.4	89497.1	87874.4	73375.4	76515.9	92738.2	74900.2
STAT1	P42224	4727.87	4118.31	4739.47	4369.63	2729.73	2569.18	2373.15	3942.44	1383.15	1245.79	1393.78	1437.92	3212.35	2637.21	2491.82	2566.65
STAT6	P42226	2025.2	1555.61	1898.8	1564.34	1114.21	1242.11	995.885	1004.54	690.155	757.138	719.256	761.595	256.154	341.733	90.8413	984.394
STAT5A	P42229	616.313	562.825	739.811	672.906	1016.35	1088.12	726.282	1044.47	327.123	417.376	430.987	394.812	300.293	360.759	267.747	112.614
MTREX	P42285	4514.25	3307.59	3356.55	3529.84	3723.93	3684.02	3778.01	3549.06	2854.63	2648.29	2589.11	2423.73	2370.99	2347.88	2504.4	2376.92
AKR1C3	P42330	41811	64459.3	72132.3	69194.4	10141.5	10282.3	17078.7	13193.3	1601.92	1175.98	1633.46	1207.22	816.815	1120.61	1146.71	217.708
PIK3CA	P42336	135.489	202.746	111.128	97.9879	144.954	203.822	199.739	86.7661	173.474	114.263	147.923	240.574	228.005	222.098	244.125	253.027
PIK3CB	P42338	496.747	459.524	452.506	160.78	75.5551	288.636	188.904	637.428	255.56	319.375	248.132	261.421	393.257	614.485	613.648	366.822
MTOR	P42345	1064.81	859.094	855.312	884.618	1114.93	1108.45	1021.25	1207.87	717.89	762.454	763.798	759.678	735.602	766.612	685.967	726.161
PI4KA	P42356	1013.24	887.359	934.798	885.837	850.99	867.562	1050.6	881.241	567.519	467.05	566.313	508.834	560.832	681.245	766.676	698.438
HAL	P42357	245.576	111.154	540.419	183.539	395.206	559.314	641.906	485.134	262.697	201.018	440.429	332.236	276.67	313.143	482.906	461.435
EPS15	P42566	1954.94	1212.24	1352.47	1465.91	667.869	847.858	974.852	807.817	658.142	890.71	929.698	890.518	1378.94	1388.2	1400.86	1630.33
CASP3	P42574	884.343	833.843	919.198	1004.76	584.621	898.45	887.824	988.856	1143.22	1110.33	1319.23	1130.76	76.5892	45.5821	139.39	110.008
CASP2	P42575	136.002	76.6657	130.153	162.47	384.856	417.248	108.303	429.585	233.006	410.147	229.089	198.587	480.047	435.44	373.446	453.662
RPS27	P42677	1099.64	2258.63	3003.54	2655.56	3146.17	3710.57	4332.25	3441.2	4618.3	4041.42	3872.53	4883.94	4662.84	4535.22	3712.04	4514.56
ABL2	P42684	303.948	375.755	381.753	199.938	301.947	185.838	393.567	257.708	196.389	185.188	70.8344	84.4795	171.611	122.596	108.67	138.458
FRK	P42685	834.427	260.326	495.396	285.071	199.539	175.935	146.587	171.763	880.325	1101.12	970.288	1034.19	691.826	633.364	670.475	803.156
HELZ	P42694	118.256	170.12	128.195	233.61	176.265	226.236	188.812	226.717	245.531	167.674	267.609	245.296	458.382	521.235	347.244	399.461
NCAPD3	P42695	140.236	158.057	119.167	277.395	575.172	742.1	919.081	753.858	719.436	863.786	920.289	645.743	493.798	580.678	621.683	372.559
RBM34	P42696	468.102	338.533	468.418	437.711	440.295	546.024	411.667	483.039	489.839	487.659	456.09	493.658	264.882	259.458	222.12	298.035
LRPPRC	P42704	15039.4	12647.2	13693	14029.8	7505.85	7823.23	8171.91	7570.22	17423.3	18001.3	18185.1	17378	9851.26	10083.3	8469.4	9948.36
ACAA2	P42765	5271.46	3756.47	3981.92	3891.95	6191.55	6460.99	7164.65	6011.16	1894.54	1898.6	1889.42	2003.39	2076.25	2294.55	2564.11	2023.21
RPL35	P42766	21738.9	14709.9	14036.2	12281.2	13927.1	12473	13951	14124.6	17198.1	17099.3	21482.7	17070.6	17783.5	18168.9	17941.6	15119.4
PRCP	P42785	1064.02	683.332	722.214	729.75	1128.51	1307.56	852.698	865.713	169.574	159.323	186.549	269.993	645.908	626.874	523.667	581.418
HTT	P42858	366.585	328.731	321.231	315.513	390.881	447.146	425.07	414.402	245.872	246.508	233.297	286.091	881.396	840.813	850.763	914.928
ECE1	P42892	507.806	430.925	442.553	445.879	2492.62	2178.1	2445.71	2883.96	457.36	337.296	383.008	402.061	1124.67	1208.76	1238.32	1073.24
MTHFR	P42898	126.31	263.707	193.442	236.957	242.204	228.429	166.545	295.537	378.319	290.724	420.809	250.809	194.612	152.68	77.4799	280.215
SLC1A4	P43007	180.822	484.047	329.5	353.84	694.469	630.051	382.608	451.726	464.776	435.36	438.711	464.134	548.992	564.842	482.716	598.399
PAFAH1B1	P43034	2618.69	2854.44	3214.53	2600.56	2438.56	2387.51	2275.17	2710.8	2442.74	2365.28	2307.4	2478.39	2276.59	2086.76	2282.89	1929.24
MCAM	P43121	83.9112	120.429	303.553	94.3715	1406.01	1654.49	1907.58	1437.24	121.62	117.026	333.908	82.6195	118.699	131.268	216.017	133.09
CRAT	P43155	2660.74	2231.78	2320.44	2480.52	1298.3	1477.99	1263.22	1399.58	1129.07	1216.03	1232.01	1346.34	6223.84	4948.07	3125.54	3690.05
MATR3	P43243	10487.3	10752	12653.3	11557.4	13221.1	12943.9	14932.1	13489.7	12621.2	13288.8	12400.4	12766.3	11190.6	11149	11028.7	11248.5
MSH2	P43246	2632.98	1971.35	2125.61	2204.85	3037.24	3262.73	3094.29	3125.9	1741.12	1686.95	1714.98	1706.09	4320.17	4322.95	3943.5	4175.48
GRK6	P43250	476.031	109.043	260.338	208.4	181.479	122.353	202.909	151.841	209.793	263.818	116.037	227.433	344.579	314.992	518.961	338.934
GPD2	P43304	3404.2	2883.22	3327.07	3204.51	5538.95	6012.61	6159.55	6073.37	2662.96	2164.5	2386.77	2733.98	5393.76	5451.01	4910.82	5458.32
SSR1	P43307	7711.19	6895.31	6425.43	6563.38	7781.47	8294	6691.26	7435.71	2795.69	2840.94	2832.42	3237.55	2246.22	2881.66	2356.11	2924.44
ALDH3B1	P43353	32872.9	28515	30963.6	28871.9	5193.45	4671.03	5706.31	6575.56	2325.29	2065.7	2035.11	2416.01	514.694	1123.59	510.412	377.784
PTPN9	P43378	526.232	454.062	646.282	619.319	211.567	381.194	266.308	667.812	343.556	249.445	238.884	452.756	202.189	196.833	203.363	345.52
RANBP1	P43487	10409.6	10018.5	11397.4	10261.8	13726.3	16286.8	15900.3	16215.4	15574.2	16388	14798.2	15888.2	12559.9	13978.9	14551.9	13505.7
NAMPT	P43490	5908.15	5825.26	6753.9	6279.15	14025.6	14706.1	13563.1	18258.9	14759.8	12224.1	13348.3	15501.7	10411.6	8683.8	7543.88	9384.97
PSMC4	P43686	6097.98	8741.41	8718.4	8455.19	6294.86	5782.05	6822.62	6848.71	7797.71	7462.16	7512.38	8079.14	9992.13	9811.96	9196.89	9610.75
TSFM	P43897	624.004	837.702	998.763	981.093	1065.37	1038.07	1179.02	1061.12	1234.03	1395.97	1170.52	1312.19	1607.21	2005.95	2057.25	2002.68
PPIC	P45877	740.66	260.357	412.465	284.484	785.06	925.897	550.76	449.947	681.674	713.156	1061.93	846.966	2119.39	1800.58	1702.36	2077.93
VDAC2	P45880	59208.7	50309.6	49605.7	48439.8	40097.1	47015.5	45536	42501.3	47460.3	42840.9	46610.9	50737.9	35944.6	39005.4	44171	40904.3
ACADSB	P45954	3718.13	2919.73	2904.54	2790.45	396.394	649.232	371.266	455.433	1082.38	1026.96	1016.94	1177.25	2418.85	2781.28	2630.49	2843.01
CBX5	P45973	2734.76	2450.02	3680.65	2803.6	4284.09	4634.26	6180.53	4993.35	2499.71	2605.88	2709.33	2673.12	4088.04	4908.11	5215.58	4894.39
USP5	P45974	9138.71	6886.3	8471.35	7844.64	7068.48	7318.92	7174.42	7504.11	5679.51	6246.89	6240.75	6180.19	11854.9	10804.2	10214	10957.5
MAPK8	P45983	484.566	202.191	386.445	248.811	163.218	95.8801	156.705	159.88	363.797	339.476	282.421	415.83	448.159	374.013	345.707	475.123
MAP2K4	P45985	1465.66	1134.52	1092	1002.23	643.935	660.533	496.955	706.289	612.744	456.649	426.98	498.923	852.122	760.419	1019.62	854.698
MKI67	P46013	616.491	496.624	593.835	527.625	1609.3	1647.38	1748.11	1520.2	2626.48	2648.34	2767.29	2602.74	2134.57	2069.85	1670.28	1974.79
PHKA1	P46020	2198.76	2413.87	3501.88	3510.6	3744.82	1728.49	1334.45	1851.25	2354.63	2343.98	2993.56	2744.9	3329.16	2974.02	3857.63	3408.04
RANGAP1	P46060	3562.58	2511.85	2551.01	2693.13	4470.73	4726	4492.62	4310.5	5220.21	5332.14	5655.85	5360.21	4076.11	4125.38	4322.79	4215.11
RECQL	P46063	3541.5	4033.49	3602.34	4038.71	2980.65	3020.62	3078.43	3635.36	1856.59	1899.9	1949.86	1795.35	1645.2	1656.44	1801.25	1624.23
NOP2	P46087	5878.88	4260.28	4616.12	4478.89	3827.23	4226.28	4523.03	4337.96	4704.3	4477.76	4822.02	4580.23	2815.84	2682.78	2657.14	3008.19
ATRX	P46100	1110.24	1180.3	1264.39	1299.66	1270.78	1343.66	1649.81	1393.34	694.031	756.92	742.693	621.9	1146.79	1190.49	1389.12	1030.81
CRK	P46108	4209.15	2936.24	3208.63	2935.17	2146.54	2064.24	1930.27	2296.18	2608.36	2579.92	2415.82	2525.83	1458.65	2029.85	2297.11	2060.04
CRKL	P46109	1242.06	1243.21	1210.46	1365.5	1062.53	1066.33	1115.98	1170.73	1715.68	1668.27	1517.47	1799.14	892.004	1340.67	1221.66	1329.95
MTIF2	P46199	1168.24	748.406	950.169	988.488	418.707	399.132	345.268	476.251	734.237	683.401	782.35	757.471	676.992	858.01	687.148	804.387
BAG6	P46379	5432.94	4630.82	5144.26	4857.52	4935.09	4615.01	4961.78	4859.86	5736.38	5915.07	5798.22	5739.59	7987.66	9339.47	10009.8	8820.66
NSF	P46459	3304.55	2633.39	2899.24	2837.19	2484.96	2510.83	2147.43	2385.13	2784.36	2756.56	2888.73	2692.66	2515.86	2461	2451.93	2545.51
CDKN1B	P46527	792.808	858.536	918.918	867.956	433.165	360.174	317.674	475.295	75.7508	74.5902	96.2667	117.969	443.483	374.078	425.537	482.409
MAP2K3	P46734	692.48	543.937	671.896	548.724	468.154	577.792	433.068	528.57	1354.83	1238.02	1208.72	1110.55	575.526	613.109	695.138	500.294
BRCC3	P46736	775.428	950.948	873.785	879.174	794.8	730.053	736.671	661.361	815.599	878.183	766.755	908.707	830.579	773.613	1014.9	726.548
RPL27A	P46776	15956.1	14787.4	21218.5	18231.5	19819.2	23437.7	22279.8	17887.9	27109.3	26227.7	27046.5	26062.8	23223.8	20110.1	20919.3	19971.4
RPL5	P46777	11421	12962.4	12826.3	12445.6	14399.2	14569.1	16405	15131.9	15617.8	17279.4	16737	16833	13054.2	12856.1	13719.4	11812.5
RPL21	P46778	7980.83	7927.47	9450.83	8097.01	8553.61	8566.32	9687.88	8126.37	12046.5	11130.9	10638.5	10357.1	10210.2	10175.1	9155.26	8027.05
RPL28	P46779	12389.1	9179.17	9629.75	9021.67	10062.9	11379.3	10200.8	9045.47	12253.4	12999.4	12618.7	11177.3	11002.2	10981.8	11438	10072.6
RPS9	P46781	34579	34155.3	37473.1	33814.6	34640.9	33193.7	39108.2	36380.7	35936.3	34329.2	36059.8	36124.8	36197.6	36839	30882.8	36112.3
RPS5	P46782	28297.9	17672.8	19281.4	18580.2	20400.1	22068.3	21491.8	22110.8	18108.6	18016.6	20183.7	19856.2	16555.1	17337.2	17839.5	17463.1
RPS10	P46783	9231.14	10247	11191.1	10556.9	10872.6	10859.5	11500.6	10944.4	12180.6	11477	13345.4	12144.6	12568.1	13011.4	11843.1	11604.9
MAP1B	P46821	7247.09	5304.68	6000.54	5583.02	2209.86	2263.98	2350.17	1971.79	997.241	925.362	780.475	742.625	830.468	614.266	722.078	908.805
GNPDA1	P46926	3144.01	3384.85	3374.75	3194.66	2479.95	3083.65	2877.4	2759.12	4065.93	3933.27	4138.86	4133.79	2064.37	2119.31	2154.56	2154.43
NEDD4	P46934	457.841	498.198	533.552	537.144	124.092	153.147	196.358	171.937	168.627	191.97	169.045	129.343	549.443	587.878	534.107	578.355
YAP1	P46937	944.41	784.726	537.784	827.921	1117.47	917.689	803.558	601.982	529.68	251.828	822.315	385.566	312.212	454.64	776.453	382.901
UTRN	P46939	27442.9	22087.1	21293.9	21594.9	13811.7	13349.5	13778.7	15025	5229.14	5197.57	5983.35	6934.41	13381.8	11612.6	11426.7	14819.4
IQGAP1	P46940	12901.3	11737.3	12766.6	12067.2	14737.6	15853.3	15501.8	17293.4	12852.6	12650.4	12786.5	13278.5	6208.91	5781.83	5737.12	5866.79
GYG1	P46976	1573.05	1332.55	1596.18	1517.58	773.739	1101.99	1141.31	824.694	2074.48	2333.42	2544.75	2208.59	2545.25	3398.88	2728.76	3628.51
STT3A	P46977	4266.33	6086.9	6623.67	6236.88	4496.4	5150.63	5024.35	5639.56	5845.76	5501.8	5497.77	6393.05	7077.81	7070.57	5836.55	7237.91
PLA2G4A	P47712	5121.93	4400.34	4744.76	4553.69	6852.24	7416.25	5097.2	6716.44	1045.24	1095.57	944.753	1046.61	434.631	87.1724	44.9552	129.666
RAP1GAP	P47736	1174.42	1017.96	1649.95	1371.31	133.588	348.067	217.022	175.995	151.001	151.824	67.7625	101.166	286.474	342.513	282.34	175.732
CAPZA2	P47755	7900.62	6527.96	5807.9	5757.18	4521.24	4847.31	3986.95	5049.46	4208.95	3888.98	3818.42	4312.26	5197.49	5363.3	5136.99	5605.33
CAPZB	P47756	12728.2	9539.75	8901.36	8497.56	10812.1	12373.7	10760.7	11271.7	8561.65	8365.35	9130.94	8664.96	12005.5	10959.2	11417.2	11838.8
EIF1AX	P47813	4649.77	4725.23	4988.14	4871.25	4854	5766.03	7158.22	6474	4160.14	4486.94	4217.46	4252.73	4516.48	4404.38	4459.02	4491.6
ALDH1A3	P47895	1203.93	1288.33	1218.52	1481.6	970.077	116.486	2612.04	1482.1	9814.59	6298.53	10593.5	9068.63	85.6148	159.206	120.981	92.2589
QARS1	P47897	7520.81	7088.81	7462.1	7554.3	7660.23	8649.24	8805.96	8755.96	10774.5	10350.9	10334.7	10071.7	5328.7	5619.7	4953.04	5311.42
RPL29	P47914	26414.6	17950	15191.5	15893	22791.3	21326.6	16142.8	24044.9	25611.7	23954.1	28050.3	22999.2	22705.6	21348.2	23936.4	18128.2
LGALS7	P47929	1679.41	1909.14	2432.75	806.697	2570.31	2682.23	2711.97	2591.98	639.278	1253.61	1433.25	12327.9	5366.16	1351.06	1529.11	2772.68
ZFP36L2	P47974	388.956	263.674	509.326	322.037	245.961	228.044	86.1386	105.172	479.34	597.883	459.649	505.501	278.91	292.828	274.92	339.529
UQCRFS1	P47985	5621.14	7253.61	8444.39	8053.71	5265.38	5442	5738.64	5453.45	4967.54	5093.68	4909.41	6161.24	4722.54	4979.45	4828.39	6235.47
ATP5PO	P48047	22443.3	16219.1	17304.8	18165.2	19211.6	19935.9	19854.3	19174.9	14012.6	13847.7	15001.3	15276	14616.5	15712.2	14801.2	15462.7
LIMS1	P48059	851.695	1168.45	1453.75	971.318	809.737	1457.73	1302.5	1479.02	925.568	761.856	582.416	735.221	735.055	782.119	765.696	755.404
PREP	P48147	2985.79	2637.89	2613.27	2823.46	1920.81	1751.7	2030.5	1784.61	7167.86	7250.16	6739.74	7233	3647.61	3670.76	3669.76	3857.22
ME1	P48163	10891	10657.4	12591.6	11144.9	4862.64	5021.03	5389.98	5664.22	6061.12	4369.23	4394.09	5969.67	11486.6	9581.86	9936.76	10923.8
IREB2	P48200	533.485	374.14	322.019	336.331	444.856	484.74	462.355	476.624	489.854	571.446	435.702	470.619	460.169	415.484	427.927	443.866
RFX3	P48380	134.378	28.8102	136.717	249.182	166.276	146.609	156.645	120.927	283.379	325.144	291.906	301.696	270.698	143.552	158.589	145.427
RFX5	P48382	189.942	234.711	257.825	294.49	650.097	618.594	713.826	595.645	192.783	242.063	359.812	266.779	342.174	488.24	492.791	376.194
PIP4K2A	P48426	1729.25	1026.89	1056.95	903.595	645.706	679.729	691.317	855.125	516.377	645.27	665.171	659.921	993.441	1122.05	1376.81	1288.94
SOX9	P48436	965.793	815.902	976.474	1059.42	658.104	1088.78	886.57	916.841	3700.26	4330.08	4266.44	3739.85	502.357	566.205	948.837	168.637
ARCN1	P48444	10734	12204.6	10549.7	10953.8	7659.08	7491.47	6908.16	7440.11	11237.6	9823.93	10941.4	9550.06	13760	13764.4	12841.4	12242.4
LSS	P48449	2307.01	2150.31	2454.3	2091.82	3987.03	3465.25	3566.95	3932.03	9814.39	8173.18	6944.31	10340	8342.83	8078.01	8083.68	7571.11
GCLC	P48506	8509.75	7190.92	7718.98	7182.92	1563.58	1766.54	2520.59	2192.06	3538.61	2665.72	3275.02	3466.33	2073.21	2313.48	2487.96	1958.81
GCLM	P48507	7001.92	5303.59	5568.27	5261.17	3628.72	3936.24	5252.43	4123.84	1651.42	1134.03	1372.57	1521.12	1212.82	909.683	891.961	726.543
CD151	P48509	6853.28	7803.31	8181.83	7044.46	4135.18	3734.86	2550.68	4681.59	2027.98	2471.84	1556.75	2257.04	1803.77	1863.75	3809.47	2407.97
TRAPPC10	P48553	152.968	172.753	225.893	125.857	92.7694	144.37	87.651	249.829	212.33	204.351	213.833	211.525	363.1	337.348	323.119	352.541
PSMD8	P48556	6187.52	6245.92	6835.33	6506.07	5844.76	6145.11	5584.31	5848.25	6189.58	5543.46	6171.15	6266.53	6836.51	6812.7	6185.75	7436.09
PRRC2A	P48634	4434.06	2796.31	3390.92	2867.7	4036.06	4218.8	3927.51	4059.91	3775.1	3943.01	3753.1	4024.98	5064.03	4719.3	5063.68	4715.94
GSS	P48637	5795.06	4469.81	4349.25	4435.16	3222.06	3713.43	3163.07	3424	6057.11	6004.63	6615.99	6014.14	5253.12	5144.31	5183.04	5006.18
CCT5	P48643	9794.32	8820.32	8429.27	9069.08	10402	10929.9	11583.3	11473.9	12097.8	11932.4	13539.7	11851.8	12323.5	11616.2	10817.7	11441.1
PTDSS1	P48651	1004.26	621.455	552.255	511.302	1109.09	1160.4	1092.57	1052.4	926.874	736.495	839.841	962.479	646.962	589.199	562.78	746.53
HSPA13	P48723	995.211	748.189	931.9	801.968	980.301	937.447	1103.43	972.486	596.528	513.168	567.752	699.438	421.262	369.198	368.206	452.594
CSNK1A1	P48729	1100.35	1260.41	1337.72	1326.03	1352.2	1185.44	1219.92	1174.36	1976.79	1787.6	1774.6	2047.81	3119.1	2903	2949.22	2835.79
CSNK1D	P48730	812.711	625.641	647.747	683.313	754.45	755.771	694.357	817.608	854.391	862.549	744.569	724.157	806.547	708.874	746.497	622.056
IDH2	P48735	14361.2	13405.1	14316.3	13834.7	7609.21	7669.43	5850.13	6951.5	25272.8	23526.4	22628.7	24101.4	71351.7	77828.9	79417.3	68580.6
PIK3CG	P48736	2834.35	3023.52	2094	2436.99	5002.43	156.995	4030.48	205.475	1457.07	1967.06	1974.06	69.4821	2089.02	1881.58	2183.76	2584.35
PITPNB	P48739	2492.57	2908.17	3471.4	3025.03	3114.95	3628.37	4174.72	3871.13	5245.44	5167.58	5154.45	5027.12	2806.53	2523.08	2612.29	2271.88
ADGRE5	P48960	800.061	290.979	203.999	286.663	1756.05	1970.8	1777.7	1895.52	752.346	652.856	677.935	705.983	100.167	143.602	111.101	140.252
POLD2	P49005	1080.44	750.804	848.867	845.294	2034.25	1938.79	2319.28	1961.67	1807.64	1836.94	1572.75	1679.25	1325.9	1397.05	1401.47	1418.53
MARCKSL1	P49006	4168.43	4188.71	4464.02	3845.79	1596.39	1835.16	1906.73	1295.89	9402.75	8994.85	8789.37	9748.25	5500.45	6915.61	6183.33	6663.34
PXN	P49023	1046.34	796.211	974.233	935.717	591.525	572.792	563.038	739.117	1127.58	935.478	1009.07	880.198	663.883	747.527	923.82	662.649
CAMLG	P49069	1043.91	656.492	434.799	640.498	467.763	473.436	131.153	354.162	515.925	442.99	578.618	337.247	864.673	755.409	939.132	560.957
NR2C2	P49116	361.263	163.863	371.978	232.431	358.035	587.949	319.207	332.01	143.253	163.239	217.719	184.451	265.308	271.593	312.149	263.056
MAPKAPK2	P49137	601.068	435.479	659.473	597.458	655.914	640.727	682.103	772.897	618.874	703.916	545.27	655.833	986.756	978.769	800.716	952.994
ALDH9A1	P49189	9684.05	8465.69	7972.45	8181.74	6734.05	7149.26	6988.63	7240.4	7719.85	7863.21	8287.8	8253.19	7959.56	8367.93	9719.42	8072.16
RPL34	P49207	20463.3	15652.5	17966.9	15886.6	17932.2	18084.6	20479.3	17669.3	19393.4	20298.2	22548.2	18721.5	16794.5	18579.9	21585.4	15657
RPIA	P49247	1592.84	661.395	621.019	767.868	659.827	398.987	763.873	538.436	1738.73	1659.12	1793.9	1770.53	937.41	1233.17	1407.86	912.21
LMAN1	P49257	4126.25	4891.38	3642.14	4318.24	5335.83	4675.22	4790.09	5345.34	2371.74	2156	2019.22	2151.16	2542.77	2277.72	2418.04	2127.4
SLC11A2	P49281	433.014	439.563	167.964	170.482	575.131	715.188	424.564	249.882	148.401	162.864	164.412	195.189	496.587	576.371	390.96	401.654
NASP	P49321	1472.62	1426.13	1703.99	1574.53	4198.12	4511.7	5516.67	5037.76	4203.54	4719.27	4454.17	4476.74	2555.4	3415.19	3210.66	3292.42
FASN	P49327	12029.9	11248.3	11353.8	11136.9	17768.2	19217.8	17692.1	18036.4	49153.4	50011.7	48308.2	48995.6	46325.4	47008.7	41003.9	45340.4
CDK8	P49336	96.328	267.471	273.728	277.75	197.04	195.893	433.367	234.498	361.743	411.882	360.092	445.125	483.715	547.971	485.741	593.96
FNTA	P49354	1226.52	1208.58	1255.14	1250.25	636.266	742.97	641.688	730.319	359.537	280.533	268.884	381.934	307.744	279.542	342.358	277.304
FNTB	P49356	923.443	1152.4	1071.04	898.979	432.177	390.621	377.738	405.681	586.602	330.861	331.21	382.767	254.764	35.5429	248.399	115.888
DHPS	P49366	253.989	506.653	328.389	447.04	966.027	1058.88	952.437	848.764	908.915	706.934	856.228	790.068	1512.56	1681.75	1537.79	1751.81
CCT3	P49368	15816	13185.2	12065.9	11925	16006.8	15596	16258.7	15596.7	16610.4	17876.2	18988.2	16803.3	11296.3	10893.9	11619.1	10551.9
MRPL19	P49406	3254.78	2512.21	2959.58	2941.01	1564.18	1663.24	2183.03	1733.97	1883.15	1977.13	1799.4	1989.39	1443.08	1687.49	1406.73	1699.27
ARRB1	P49407	3255.73	2967.62	2904.63	2665.87	113.159	102.599	78.1887	62.7029	358.734	394.602	431.379	377.987	566.236	633.519	983.928	696.252
TUFM	P49411	33107.2	29622.7	29067.4	29585.4	29135	32568.3	36295.4	28739.9	42512.9	41419.8	38124.7	40882.9	27003.8	28808.1	29226.4	30996
ALDH7A1	P49419	11513.1	10524.4	10622.1	10790.3	7871.85	9000.68	8372.21	9086.35	6409.14	6821.95	7547.36	6748.01	11045.3	11601.8	11544.3	11485.1
CDC34	P49427	2887.73	1737.1	102.964	105.248	460.659	337.629	98.6286	524.091	558.67	511.312	370.497	346.509	219.83	304.158	356.837	464.14
INPP1	P49441	655.657	728.324	265.377	666.665	619.565	627.287	623.582	786.796	1665.51	1227.91	1737.67	1500.2	308.842	96.823	106.773	72.039
CENPF	P49454	123.932	1449.44	1796.54	850.378	1490.3	1715.93	1937.82	1664.5	1305.55	1633.89	1563.9	1451.66	873.421	560.333	1028.92	710.281
SRP9	P49458	7877.35	6096.79	6911.67	6660.2	8694.41	8186.05	8088.99	7646.24	5800.62	5675.04	7044.7	5350.7	4356.07	4380.16	4872.57	4172.12
UBE2A	P49459	71.5534	1410.19	1327.59	1225.71	1869.98	2256.33	1851.4	1915.65	1372.82	1210.03	1326.64	986.32	866.487	1249.81	532.45	126.934
PCYT1A	P49585	1513.67	1128.85	1198.33	1165.17	765.782	775.529	776.752	804.825	756.047	838.886	820.452	830.292	1851.04	1978.68	1803.07	1885.9
AARS1	P49588	11489	9580.42	8714.35	8997.5	6220.16	6343.65	5795.77	6245.48	6331.81	5949.34	6779.23	5966.87	19274.6	20423.2	19120.1	19367.4
CARS1	P49589	5007.59	3943.73	4008.68	4007.99	2406.56	2514.28	2237.74	2344.49	4942.39	4935.36	4598.77	4867.46	2936.82	2598.54	2484.75	2609.49
HARS2	P49590	1627.86	1230.25	1588.39	1689.37	1396.04	1668.6	1286.19	1382.66	1408.62	1755.96	1653.91	1604.37	1633.68	1539.23	1465.83	1665.72
SARS1	P49591	5860.07	5728.92	6493.46	6302.61	5925.97	6385.21	6057.45	6160.26	7758.81	8060.59	7926.5	8448.9	14226.9	13233.4	12823.6	13618
PPM1F	P49593	747.49	686.424	649.847	709.994	564.345	537.574	909.006	501.253	204.077	304.326	267.423	307.015	465.059	444.308	427.665	537.176
PRIM1	P49642	231.991	232.688	453.268	429.966	1465.41	1353.66	1633.67	1661.02	927.128	1207.29	1161.32	1121.25	1234.4	1386.76	1336.25	1243.58
PRIM2	P49643	60.8924	394.949	516.524	525.21	2114.09	1663.37	2268.52	2054.77	1381.37	1420.99	1388.54	1434.89	1355.27	1564.79	1496.59	1438.58
CSNK1E	P49674	228.936	113.964	180.213	335.98	600.362	776.438	653.457	757.442	581.347	554.542	678.745	737.342	446.837	464.27	484.492	123.776
CTCF	P49711	723.847	489.742	480.228	523.956	386.442	473.289	528.433	393.432	694.662	836.277	702.823	648.639	1156.9	876.291	1084.73	959.958
CEBPD	P49716	941.351	498.646	655.392	533.4	634.815	803.978	706.137	548.841	230.434	453.232	190.609	263.281	137.813	90.8115	226.058	142.488
PSMB3	P49720	7507.57	4398.29	4592.72	4557.87	4767.52	5691.09	4722.16	4864.44	4882.6	4105.63	5340.11	4489.84	5058.48	5112.94	4946.26	5206.82
PSMB2	P49721	2420.2	3523.81	3837.03	3651.43	3852.61	3532.55	3384.17	3109.46	4410.15	3665.62	4072.14	4050.6	3905.11	4084.7	4186.8	4095.74
MCM2	P49736	3716.58	2746.92	3128.35	2875.29	9075.6	9401.64	9964.65	9548.31	7179.78	8178.99	7901.69	7409.85	10633.7	11807.6	11529.6	10495.3
ACADVL	P49748	12287.9	10262.3	10447.2	10361.9	10664.7	11588.8	10197.6	10526.5	3503.47	3097.6	3398.1	3884.99	9082.04	9949.49	10621.1	10777.3
YLPM1	P49750	3062.06	2376.9	2757.88	2584.78	1877.86	1718.24	1802.28	1809.15	1502.91	1459.53	1333.63	1372.41	1537.53	1380.4	1909.21	1701.64
VPS41	P49754	149.207	233.853	270.289	262.293	184.863	145.247	268.25	375.747	125.864	68.2121	85.5066	216.888	76.7672	43.54	156.544	126.43
TMED10	P49755	11554.1	12257.7	11908.8	11913.3	7365.41	7332.14	6918.16	7871.99	7582.88	6748.71	7562.08	7395.26	10703.8	10528.7	9915.04	10579
RBM25	P49756	2444.72	2439.55	2912.43	2840.72	2256.73	2133.08	2505.06	2443.46	2997.78	2973.63	3061.06	2908.38	3056.78	2960.41	3020.64	3083.77
NUMB	P49757	1779.25	1362.33	1240.78	1287.3	424.411	529.652	441.67	552.15	764.947	753.812	756.249	874.754	599.718	471.398	702.69	572.142
PSEN1	P49768	722.673	642.349	883.606	906.848	656.694	485.563	310.965	486.033	314.585	510.634	414.835	623.158	245.013	85.688	192.507	217.144
EIF2B2	P49770	633.952	511.865	697.74	523.958	663.987	662.195	631.673	723.515	493.576	548.958	482.507	562.267	675.941	729.651	676.591	695.108
HINT1	P49773	1450.95	1076.22	1241.56	1193.23	2865.25	1906.74	2468.98	894.834	1004.72	1048.84	1297.94	814.174	817.153	736.184	1027.13	746.201
NUP153	P49790	1821.04	1471.37	1975.16	1768.77	1761.65	1811.78	1781.81	1681.12	950.925	917.092	895.017	883.579	1373.22	1142.43	1994.54	1589.41
RANBP2	P49792	3157.07	2606.37	2918.79	2728.34	2730.29	2754.48	2753.71	2565.7	2674.51	2646.24	2539.42	2671.2	2244.33	1946.16	2257.08	2114.67
TSC2	P49815	151.856	86.2613	394.946	227.925	414.35	517.405	521.92	612.297	253.153	240.674	322.315	100.481	349.507	187.411	403.259	238.792
NDUFV1	P49821	3792.04	3104.59	3319.2	3583.42	1551.36	1463.52	1430.62	1398.71	1955.81	1817.76	1650.48	1894.3	2275.98	2522.96	2275.59	2223.43
GSK3A	P49840	739.503	700.345	707.449	611.677	367.676	310.295	384.969	352.154	409.158	328.146	451.821	448.572	534.979	438.481	532.116	579.886
GSK3B	P49841	911.126	848.052	749.682	874.926	1027.32	972.76	844.494	743.652	1096.31	1140.77	1154.53	1154.49	1349.34	1413.11	1396.11	1234.99
TAF6	P49848	395.979	248.518	260.378	295.693	273.503	375.537	230.262	274.78	390.048	403.324	332.279	384.805	506.976	544.858	502.052	547.52
NT5C2	P49902	1177.17	1593.63	1627.48	1793.44	701.015	722.159	690.706	797.085	818.125	710.83	837.492	886.026	500.264	561.696	547.05	571.052
SEPHS1	P49903	1461.82	1341.79	1657.17	1703.95	1347.85	1082.43	1056.65	975.348	1392.19	1251.17	1353.19	1227.85	2043.24	3428.42	3320	3360.27
MTHFS	P49914	2050.13	1991.97	1518.88	1941.95	952.055	1021.8	1017.99	709.579	1015.93	854.113	937.247	851.449	564.974	661.137	683.784	458.039
GMPS	P49915	4836.56	4305.71	5118.08	4663.23	4428.76	4480.8	4851.14	4595.85	6233.44	6058.03	6250.94	5858.46	7081.29	7174.5	6647.67	6949.71
LIG3	P49916	1370.27	1120.68	1155.7	1198.21	806.746	850.414	790.382	816.709	831.227	853.926	797.994	797.815	1109.88	1200.8	1088.42	1265.44
MRE11	P49959	2312.45	1663.56	2026.08	1854.51	1828.08	2039.37	1969.71	2016.68	764.902	766.638	734.839	817.113	1872.41	1676.56	2034.4	1878.39
HNMT	P50135	764.346	515.126	659.88	596.021	1738.13	1795.45	2151.27	2551.27	215.568	275.643	365.829	301.253	309.654	304.029	388.368	212.69
GNAQ	P50148	1291.05	1054.01	1130.67	1153.79	321.17	277.401	405.197	339.221	1038.3	968.808	832.594	998.974	205.514	133.261	91.9877	139.539
IDH3A	P50213	8935.45	8121.01	7817.66	8797.88	6970.28	8063.48	8095.92	7728.9	7562.98	7676.33	8186.01	7673.39	4663	5733.3	4968.83	5078.31
SULT1A1	P50225	4037.23	3282.88	3797.09	3941.71	1456.71	1713.27	1197.76	1396.21	160.846	116.311	14551.8	99.0254	2490.19	2801.44	2027.28	2156.58
PPOX	P50336	1120.98	626.941	885.802	684.636	711.369	1107.22	821.411	732.465	328.45	318.223	284.728	339.139	357.219	383.118	421.357	240.89
GDI2	P50395	21288.1	21868.3	23029.2	22443.1	16925.6	17402.9	16933.3	18286.9	19080.9	18901.3	19472.5	19683	31140.4	30822.7	30566.5	30367.5
EMD	P50402	4011.27	4071.94	5768.66	4187.39	5538.83	6191.73	6997.16	6564.84	3723.52	3526.02	3293.47	3628.82	3362.16	2233.22	5128.16	2915.3
CPT1A	P50416	6287.66	5985.08	5802.27	6048.56	3174.39	3352.56	3280.14	2877.4	4128.07	3352.55	3316.17	3897.93	5186.95	5324.77	6039.34	5084.81
SLC26A2	P50443	103.758	40.9015	158.192	189.988	90.3261	167.506	98.0512	66.1305	166.425	212.368	194.62	152.436	518.953	474.91	422.96	382.686
SERPINB8	P50452	1945.1	2390.66	2349.83	2021.68	1180.61	1609.08	1035.37	2259.67	1324.99	914.981	1136.94	1026.79	1320.4	1222.6	1399.28	1489.89
SERPINB9	P50453	2521.18	2695.38	2428.34	2278.39	864.894	1109.33	1153.61	956.823	234.805	89.6019	116.68	98.2839	357.321	384.807	402.773	430.214
SERPINH1	P50454	3392.21	5008	6301.94	5524.84	10281.1	10634.6	12642.7	11606.1	6548.77	5634.71	5635.94	6163.7	5892.68	5214.89	4787.98	5946.06
ST13	P50502	27786.8	23100.2	21123	22376.8	30467.1	30766.4	31185.8	32305.3	34756.5	34149.6	35923.4	33401.6	17731.9	20125.9	19220.6	17984.8
PEX5	P50542	463.831	170.679	282.406	266.825	93.3197	94.6562	227.26	246.221	216.526	264.305	321.406	249.077	238.797	251.574	174.368	146.59
ERF	P50548	407.563	339.994	362.798	288.908	409.118	294.306	320.417	255.456	330.464	221.085	413.613	203.808	199.718	245.573	248.335	248.749
VASP	P50552	7272.82	7233.62	7307.62	7382.16	2845.14	2996.74	3840.12	3266.44	3786.25	3316.17	3785.5	3806.5	5413.04	5718.86	5332.39	5192.11
DNM2	P50570	8203.21	5545.2	5996.52	5829.38	3369.36	3207.44	3033.23	3074.87	5537.1	5235.18	4981.85	5711.45	6514.6	6136.59	6449.15	6165.54
METAP2	P50579	1069.02	931.12	1106.24	1085.94	749.723	762.117	884.283	719.736	882.208	1347.97	1123.78	934.096	767.879	736.178	788.027	681.567
NUDT2	P50583	287.908	578.322	682.573	589.379	726.017	560.018	740.845	647.093	391.172	335.131	323.383	570.484	777.283	796.356	830.682	593.764
CDK7	P50613	1074.9	597.987	845.056	555.238	524.655	670.899	544.918	593.097	876.072	762.579	691.082	929.337	702.724	799.405	765.843	921.129
HLCS	P50747	1003.8	963.979	888.024	826.35	754.312	481.867	327.791	706.984	875.893	982.667	897.728	876.594	615.109	773.264	762.953	725.69
KNTC1	P50748	362.697	214.209	357.52	277.751	595.142	551.641	544.445	582.912	539.901	633.922	589.446	631.555	449.406	465.126	452.058	443.349
CDK9	P50750	1025.17	1193.5	1276.83	1229.61	1348.9	1443.6	1161.2	1129.23	1073.15	1247.67	814.739	1170.81	1379.69	1655.99	1407.78	1521.56
LRBA	P50851	1816.33	1701.41	1797.81	1689.13	1655.47	1705.62	1736.19	1695.06	1062.89	1060.3	1006.91	1069.65	2128.69	2084.71	2125.14	2112.84
BCAM	P50895	1899.8	1055.03	1065.63	1316.12	970.078	1051.98	1569.1	1333.17	78.7106	157.981	219.734	59.7454	2737.5	3442.53	3978.77	3084.67
PPT1	P50897	2481.53	1797.79	2280.6	2185.71	4577.57	4890.65	4391.82	3504.07	1994.4	1839.87	1994.44	2020.8	1840.12	2583.64	3120.83	2151.41
RPL14	P50914	44965.7	27911	25340.3	25910.9	30382.7	29432.1	27798.7	26315.2	35162.5	35376.6	38365.3	31595.6	30060.3	34735.7	32640.9	28619.5
CCT8	P50990	13732.4	12406.9	12523.6	11925.2	14458.8	14846.3	15698.1	14553.9	17778.6	17841.3	18474.7	17967.4	14203.2	14465.2	13583.1	14227.4
CCT4	P50991	16527.2	12942.8	12263.6	11464.4	15348.5	15636.4	15657.6	14454.4	17933.9	19095.5	19135.7	18597.6	17251.7	17362.8	17558.5	17467.9
ANXA11	P50995	8706.93	7644.85	8977.38	8374.77	5551.13	5661.03	4990.47	5219.78	8596.02	8783.85	9024.2	9582.97	4403.64	4737.64	5069.17	4618.72
PAPOLA	P51003	962.837	960.476	1114.7	1017.79	795.247	712.627	1006.91	844.216	1365.17	1477.51	1293.29	1438.34	1339.12	1341.49	1294.91	1442.16
FXR1	P51114	1332.12	990.428	1196.95	1004.27	1200.87	1225.12	1014.52	1032.08	1445.88	1454.7	1288.89	1432.62	1376.55	1427.6	1378.99	1522.85
FXR2	P51116	4256.32	3430.1	3526.05	3913.28	4259.2	3946.93	4154.05	4031.22	3229.59	3647.78	3589.5	3172.35	5401.85	5136.71	5084.27	5304.35
RAB5C	P51148	8221.54	7113.6	7346.46	6411.75	5664.91	5835.23	6003.26	5735.06	6056.63	5502.79	5914.67	5306.99	7533.7	8097.98	7860.16	7917.28
RAB7A	P51149	13381.4	10800.1	11369.7	10576.9	14009.1	15286.5	14206.3	14975.9	18133	16787.2	16743.3	18299.7	29125.5	29582.9	27910.8	29295.3
RAB9A	P51151	1023.54	550.665	854.095	688.658	1397.8	1196.87	1527.31	1561.85	398.963	410.538	321.843	516.607	1553.98	1560.85	1856.5	1813.61
RAB13	P51153	2727.26	2278.79	2481.95	2183.57	1337.1	1565.14	1448.51	1652.58	1403.51	1614.49	1449.91	1353.65	2531.03	2886.23	3172.84	2387.95
RAB27A	P51159	225.536	459.05	388.59	345.739	870.539	952.858	813.376	958.749	317.446	273.543	225.686	299.2	725.355	818.907	658.711	850.2
PLCD1	P51178	232.389	110.787	161.287	160.493	289.917	87.772	108.613	92.9854	258.168	230.978	205.936	254.754	92.966	107.22	49.3701	90.9832
DAP	P51397	1030.12	573.098	284.28	362.989	1406.93	1566.14	908.981	1516.99	414.917	317.779	692.97	258.513	1103.01	1088.45	1440.81	1068.61
DAP3	P51398	1190.39	878.385	1303.73	1120.39	729.16	909.771	941.901	812.486	1188.09	1292.89	1294.08	1241.6	665.371	752.348	671.081	744.148
DUSP3	P51452	2695.47	2743.15	2699.19	2682.52	2263.09	1925.6	1401.15	1926.51	1059.73	1073.24	1105.32	1015.45	1294.62	1259.19	1189.73	1302.15
SMARCA2	P51531	1509.56	1354.98	1365.85	1249.77	1397.99	1664.92	1758.6	1970.99	940.994	969.156	1079.15	1077.81	637.104	550.575	597.894	548.965
SMARCA4	P51532	1603	867.482	897.966	1206.41	2047.5	2282.66	2351.93	2080.79	2073.37	2030.24	1989.26	1872.48	2788.87	2772.5	2754.03	2903.88
IDH3G	P51553	2943.66	3141.73	3012.35	3181.29	3002.27	2866.03	3782.92	3667	2234.86	2222.03	2437.24	2343.19	2325.87	2259.31	2526.66	2332.46
GALK1	P51570	6758.52	5853.17	6293.81	6106.36	2826.64	2780.16	3019.93	2985.37	1491.06	1658.19	1483.27	1678.08	5195.04	5158	5649.67	5463.73
SSR4	P51571	6792.14	6880.29	6329.46	6688.82	7803.93	7330.25	6191.52	8040.69	4230.48	3821.93	3955.36	4275.61	3876.46	3836.61	3653.71	3539.29
BCAP31	P51572	5203.56	4737.31	5193.95	4892.04	2662.19	2576.12	2961.18	2755.25	3832.55	3245.08	3326.35	4064.38	6165.08	5635.61	5493.2	6426.87
TPMT	P51580	493.551	691.676	1007.6	820.881	623.684	829.17	750.299	688.664	697.262	600.351	596.069	741.309	623.877	721.924	639.03	652.55
MECP2	P51608	395.606	380.377	458.593	412.693	297.581	261.495	450.154	329.881	263.911	190.45	286.425	281.546	339.298	347.167	307.6	470.985
HCFC1	P51610	4643.3	3473.32	3908.64	3630.58	3954.34	4048.5	4028.49	4183.56	3913.37	3984.12	3861.33	3839.6	4340.62	4049.66	4994.56	4014.07
IRAK1	P51617	660.68	439.627	489.077	382.497	332.179	403.994	164.501	45.5	203.422	293.26	200.52	177.393	402.079	334.111	289.914	253.109
CAV2	P51636	394.359	851.039	1633.63	1484.48	290.179	500.626	364.463	592.168	251.634	163.031	101.73	168.686	55.7846	79.6887	31.9015	172.236
ALDH3A2	P51648	14720.6	11986.2	12618	12786.1	6082.9	7360.37	9194.91	8125.94	6229.34	5456.2	6024.22	6659.88	2522.65	2628.35	2522.68	2575.25
ALDH5A1	P51649	1237.84	1283.38	1237.07	1375.16	544.083	571.847	508.687	674.172	797.795	889.062	738.007	962.26	1870.21	2480.09	2696.68	2452.78
HSD17B4	P51659	13712.9	11691.6	11574.9	11067.7	8325.12	8614	8570.73	8430.51	12536.8	13282.1	13696.5	12881.5	17033.3	19571	20376.5	18026.2
PSMD7	P51665	4597.4	4736.13	5304.95	5075.9	3791.03	3845.89	3843.33	3916.12	4501.65	4144.86	4074.55	4258.11	5825.22	5690.95	5230.01	5174.25
SUOX	P51687	261.069	89.5716	103.425	215.137	81.0087	155.062	102.891	75.1624	185.905	198.045	116.139	344.503	357.917	575.773	609.317	481.457
SGSH	P51688	679.687	571.918	547.102	543.63	1205.77	1150.33	924.655	964.455	53.3011	87.7741	221.414	151.699	285.075	451.359	416.159	455.375
STAT5B	P51692	424.289	286.598	212.521	229.349	621.48	406.555	375.841	417.097	100.736	93.4226	102.128	132.303	191.164	146.62	109.363	96.0701
USP11	P51784	629.942	724.743	802.516	826.442	559.262	576.259	589.263	631.454	827.13	678.832	771.031	818.897	991.142	920.342	655.731	782.921
DYNLT3	P51808	266.277	421.982	347.449	370.793	405.431	455.824	288.09	418.51	357.203	279.043	307.198	327.481	310.647	204.054	356.138	347.843
VAMP7	P51809	943.691	551.402	605.672	703.811	822.421	911.836	969.422	1013.98	463.157	423.29	415.121	549.141	612.453	646.406	540.507	650.283
RPS6KA3	P51812	4667.3	3512.09	4098.41	3790.16	1533.24	1640.62	1665.25	1743.64	1825.74	1695.27	1547.59	1786.54	891.696	855.238	824.601	879.64
HDGF	P51858	16349.2	14124.9	18482.6	15227.4	14714.1	16315.8	21501.9	17908.8	9674.15	9115.12	9018.45	10692.9	16628.5	17757.1	19079.7	19431.8
CCNH	P51946	349.871	102.778	756.304	660.768	473.371	574.586	95.6099	809.221	432.117	438.557	675.248	468.35	442.486	490.136	439.013	626.627
MNAT1	P51948	851.589	278.208	424.484	358.132	610.746	429.843	596.89	394.754	545.76	406.618	566.163	635.732	368.449	436.599	540.438	505.536
UBE2E1	P51965	536.558	666.598	646.805	447.549	721.28	849.484	742.203	525.974	696.856	855.026	788.617	914.479	994.744	769.773	927.319	786.919
NDUFA8	P51970	2203.94	3290.85	4408.95	4236.35	1888.15	1858.18	1828.5	2027.53	3151.67	2661.36	2792.47	3284.19	2121.74	2261.03	2111.94	2193.9
HNRNPA3	P51991	4903.34	7850.67	10683	9255.12	5753.12	6756.07	8377.33	6261.5	7265.14	7383.78	7858	7723.32	8213.9	7882.56	6770.61	8021.68
PGD	P52209	106943	124493	134904	128270	24680.6	27040.1	27563.8	27198.6	23208.7	20489.4	21425.6	23426.1	19609.8	17706.8	17576.8	17356.6
HNRNPM	P52272	21070.8	15548.7	20296	16328.5	13615.9	14527.2	14236.7	12308.2	17954.8	19875.9	19347.1	20067.1	15699.3	15113	18300.9	16098.8
KPNA2	P52292	2896.88	1723.18	2009.28	2212.1	8633.88	8350.01	8711.07	8607.11	11781	11104.8	12050.9	11627.8	8482.93	7993.86	6711.11	7554.02
KPNA1	P52294	1418.74	1272.08	1740.77	1586.74	1459.95	1612.8	1526.59	1241.48	1557.05	1336.3	1478.76	1712.56	2902.01	2793.58	2610.94	2781.63
NCBP2	P52298	1763.81	1850.72	1829.67	2067.48	2747.29	2675.68	3052.67	2900.62	1949.06	2146.68	1909.78	2127.34	2647.74	2812.72	2801.74	2683.74
RAP1GDS1	P52306	966.891	746.702	1006.48	822.383	1401.91	1429.22	1382.82	1310.77	1411.54	1371.68	1298.46	1255.9	1748.77	1616.19	1423.41	1495.95
DGKE	P52429	168.157	88.4901	89.3523	81.2087	126.637	103.163	104.917	60.7582	252.114	210.605	239.709	272.429	447.919	352.591	398.827	414.021
POLR2H	P52434	1353.11	1270.69	1700.8	1107.39	1498.91	1662.21	1352.7	1420.96	2262.12	2058.39	1955.57	2184.21	1771.55	2273.57	1900.09	2346.53
MAP2K6	P52564	817.569	997.612	854.359	717.043	754.735	781.052	808.924	730.465	952.392	868.482	828.222	871.592	379.482	580.151	484.547	423.555
ARHGDIA	P52565	13802.3	13139.6	13038.1	12190.3	12950	13007.9	14263.4	14563.7	12114.8	12203	12192.4	12819.4	13822.7	13630.9	14211.4	14147.3
AGFG1	P52594	5948.65	5536.83	5733.06	5552.47	1963.27	2462.19	2694.87	2743.14	1681.11	1663.74	1784.61	1744.85	2259.81	1755.98	1964.42	1822.28
HNRNPF	P52597	10962.4	10583.2	9502.88	9904.13	9167.44	10749.6	11261	9957.89	11147.3	11959.6	12622	10818	13263.4	13171.6	14756.3	13143.7
STAT2	P52630	1303.66	871.152	837.909	840.465	686.276	719.659	522.746	969.229	159.849	282.218	200.46	253.013	701.484	749.314	747.885	693.268
GTF2A2	P52657	117.367	727.842	838.896	1010.97	888.289	1020.88	775.15	962.842	917.713	856.499	1305.15	1072.72	1027.76	1171.27	1228.37	1118.61
MSH6	P52701	2322.3	1633.25	1818.66	1694.96	3119.29	3371.19	3126.28	3083.78	1193.26	1376.7	1241.37	1297.04	4629.11	5000.82	4992.75	4721.99
KIF11	P52732	598.731	866.376	375.993	710.225	885.491	1116.67	1058.09	1059.75	2723.72	2643.14	2588.55	2655.34	1449.87	1162.03	1082.28	1116.15
VAV2	P52735	2003.23	1306.78	1918.12	2117.89	2850.11	2226.71	2653.47	2526.03	2535.2	2475.82	2941.85	2919.45	4464.67	4843.83	3802.87	3906.37
RBM5	P52756	337.058	477.007	741.793	162.461	567.099	704.623	739.115	799.948	510.654	452.594	547.062	623.147	411.454	475.479	396.237	784.836
RIDA	P52758	2371.78	1919.45	1664.94	1890.97	1486.73	632.681	87.6577	1602.78	1797.69	1503.45	1766.32	1955.17	2378.04	2266.52	2585	2641.02
SMS	P52788	3684.32	3212.77	2981.82	2964.65	1970.18	1951.63	2300.46	2320.52	2898.53	2584.67	2784.77	2669.51	2135.03	2120.95	2100.51	1904.41
HK2	P52789	175.524	202.914	250.351	694.016	1780.2	1499.23	1379.73	1384.43	4050.34	3697.93	4050.78	4216.41	2947.23	2903.18	2767.27	2488.19
EFNA5	P52803	634.012	472.791	368.593	430.613	275.181	273.966	197.251	93.2068	83.7757	97.4373	150.286	220.722	100.865	180.469	136.727	137.863
MRPL12	P52815	943.474	646.167	647.403	581.976	720.921	553.223	705.096	378.983	417.214	562.667	927.584	400.093	386.494	433.071	520.486	464.29
THOP1	P52888	2161.77	1596.23	1870.32	1666.8	2771.16	2840.65	2671.06	2950.89	2424.44	2280.63	2366.06	2289.15	1738.24	1801.24	1773.38	1696.3
AKR1C2	P52895	250787	96553.9	123813	115844	14769.5	16251.6	37473.1	20364.8	1032.8	1355.8	615.005	1465.36	349.27	453.329	121.089	6209.61
CAPZA1	P52907	14265.5	13515.3	15465	13247.9	21486.8	20619	23862.8	22311	14570.3	14790	14910	14106.9	22342.2	19870.4	19925.3	21357.1
CRIP2	P52943	1795.75	1627.44	2192.66	1417.98	4120.63	3984.35	3068.31	3041.91	116.483	80.7597	160.209	129.223	5905.63	5681.58	5461.43	5703.47
NUP98	P52948	2304.75	1874.03	2270.65	2079.55	2388.18	2729.16	2365.72	2361.7	2110.9	2409.52	2031.34	2180.08	1426.57	1360.07	1701.99	1639.2
BLVRA	P53004	11288.5	11518.5	12070	11435.3	5145.8	6025.24	6083.32	6438.41	1357.99	1424.79	1292.62	1369.8	8938.08	9610.53	9798.11	10154
SLC25A1	P53007	4959.54	5979.77	6250.87	6232.72	4401.63	5099.76	5223	4601.73	6010.8	4774.6	4255.82	6015.85	11078	12912.7	12207.2	11976.6
PPP5C	P53041	880.654	1105.49	1061.7	1079.36	1032.8	1048.99	1080.71	1106.46	990.748	1096.35	974.189	1068	882.144	967.069	866.317	995.272
PLK1	P53350	276.006	134.983	113.096	80.7274	355.917	410.324	372.64	382.624	882.237	729.863	926.549	861.011	223.014	230.23	196.294	285.317
ARFIP2	P53365	371.546	581.868	661.475	511.058	541.237	518.925	434.267	570.749	782.184	816.271	824.949	887.584	652.098	776.307	624.889	668.461
ARFIP1	P53367	1748	2110.78	2240.59	2386.2	1655.4	1625.73	1805.93	2025.74	1580.32	1701.69	1664.91	1802.3	2264.54	1950.75	2144.08	1958.95
NUBP1	P53384	2311.98	1613.4	1593.55	1801.18	1807.02	1762.87	1479.66	1445.11	730.744	642.911	577.61	754.191	2400.85	2155.73	3460.67	2274.07
ACLY	P53396	26719.7	23897.7	23897.2	24170.4	18762.8	18280.5	16458.6	19034.1	16132.5	13721.3	12354	15952.6	12309.4	11378.4	10028.1	11255.4
METAP1	P53582	441.998	590.329	637.685	553.525	327.744	400.398	453.71	353.384	616.451	571.156	648.388	575.496	530.106	588.824	722.5	549.244
SUCLG1	P53597	2423.62	2558.19	2456.65	2433.97	1608.1	1722.64	1656.54	1492.54	2504.17	2220.29	2582.4	2283.62	1671.21	2018.27	2153.61	1897.38
MVD	P53602	1233.33	1220.25	1012.81	1207.81	904.862	756.239	678.112	825.698	4873.34	3645.69	3026.57	4560.48	5222.27	4461.4	4231.92	4452.47
PGGT1B	P53609	502.803	673.161	584.107	530.306	381.231	484.87	207.223	402.157	216.015	134.374	130.001	290.809	207.936	42.2236	72.1597	181.293
RABGGTB	P53611	718.431	882.317	1078.41	1014.53	1154.61	978.179	1693.17	1577.07	1293.69	1456.69	1319.67	1221.03	1274.22	1325.71	1216.48	1363.23
COPB1	P53618	4901.91	4937.54	5111.69	5078.26	3343.65	3413.43	2729.49	3334.47	4406.01	4131.65	4089.02	4492.13	5712.84	5456.53	4908.38	5585.59
COPA	P53621	11039.5	14048.8	13503.5	12938.3	9809.66	9897.02	9033.59	10091	11411.7	11210.7	11162.3	11653.5	14096.4	13684.4	13885.3	13639.5
CTSC	P53634	3847.4	3892.97	5460.12	5161.28	7856.67	9077.61	7946.17	4811.74	3490.85	2986.84	4077.49	3520.1	637.582	442.543	335.73	635.212
AP3M2	P53677	907.229	1124.46	1168.78	1238.42	1033.5	1056.67	963.327	835.311	1486.52	1508.59	1459.59	1386.09	1340.91	1444.84	1361.01	1400.88
AP2S1	P53680	9634.52	5269.73	5050.47	5787.96	3277.36	3881.9	4174.79	4317.12	3072.48	3341.85	2823.91	3288.22	4296.51	4621.32	4121.37	4633.33
HCCS	P53701	642.366	722.826	894.762	917.419	731.295	692.163	576.794	687.474	985.249	1031.68	879.082	1097.36	379.565	407.631	345.795	417.571
PTTG1IP	P53801	179.791	701.808	328.66	112.359	685.173	264.578	138.876	100.94	2052.55	1504.84	1348.25	1289.41	482.857	1397.68	1342.29	1118.4
TTC3	P53804	190.691	116.518	102.899	92.9513	57.7585	117.678	68.8938	172.658	123.44	113.384	97.0484	91.7847	126.023	152.337	116.087	158.664
SMTN	P53814	695.647	98.0727	99.6842	67.1856	280	159.774	129.192	295.865	509.977	509.82	575.275	562.823	208.868	66.6009	140.608	182.649
SLC16A1	P53985	972.473	891.705	1233.81	821.708	2913.05	2139.22	3001.4	2894.37	3072.11	2926.29	2530.59	3302.75	722.593	455.633	534.155	856.531
IST1	P53990	6917.44	5822.96	5863.82	5983.71	3421.65	3575.2	3010.19	3394.77	4202.59	4301.5	4446.83	4402.69	5652.43	6107	7198.2	6203.61
SEC24C	P53992	8781.86	6496.85	6335.13	6871.4	4588.64	4673.07	3852.99	4891.83	4612.36	4119.57	4611.77	4596.98	4840.42	4811.44	4490.31	4923.12
SUB1	P53999	4444.77	5937.92	6487.08	5925.34	15964	14751.3	17362.8	17849.7	7989.88	7105.11	6985.54	7508.42	9650.23	10534.4	9106.43	9440.79
POLG	P54098	552.829	251.206	307.624	255.923	426.742	415.002	373.894	417.23	559.13	518.105	610.911	436.113	341.074	350.728	323.673	359.368
CLNS1A	P54105	1619.13	1469.67	1752.76	1933.58	3881.34	3186.23	3040.25	2525.67	5874.68	4947.07	4839.74	5122.37	2721.23	3538.17	4519.51	4214.05
BLM	P54132	6389.66	5185.14	8944.83	6009.81	6210.79	8687.25	6723.84	9325.45	11329.4	9825.5	10563.6	10449.2	5163.74	3844.77	4576.54	5095.35
RARS1	P54136	9634.54	9420.04	9888.79	9392.32	6951.32	7809.9	7593.71	7761.52	8394.21	7641.23	7796.4	8290.96	7309.04	7348.63	7112.5	7331.5
HIRA	P54198	198.4	114.371	189.039	136.953	113.628	203.615	87.7811	158.682	228.468	198.79	201.298	216.926	171.089	163.744	180.042	201.24
ATXN3	P54252	878.269	810.671	314.458	647.374	348.378	140.366	381.257	174.052	374.217	282.234	322.018	192.794	1253.45	1238.95	1472.29	982.618
PMS2	P54278	723.098	123.068	164.957	149.444	286.125	325.607	224.496	318.218	94.1985	85.8534	29.6939	174.66	248.389	216.628	165.737	280.806
YARS1	P54577	4773.88	4518.2	5108.66	4602.67	7601.67	7589.38	7585.74	7708.06	8364.02	8777.61	8257.98	8333.27	7072.77	6926.36	6525.13	7354.41
USP14	P54578	5256.06	4491.42	4673.59	4788.08	4681.18	4506.8	4032.26	4451.84	2868.28	2839.84	2715.63	2819.18	8522.77	7781.94	7929.04	8252.34
PRKAG1	P54619	2187.73	1818.39	2557.05	2230.19	1110.64	1461.65	1312.07	1559.13	1502.2	1618.7	1394.35	1565.79	1924.32	2050.75	1797.6	2118.28
HSPA2	P54652	74196.3	61893	69877.1	60269.7	47134.3	49901	53148.1	50720.2	57007.9	54388.4	59659.1	58371.7	63898.5	60358.9	58593.2	63215.4
ATP1B3	P54709	3058.34	2398.17	3100.52	2800.48	6587.31	6689.98	6098.07	7100.33	7267.11	5423.33	6784.77	7881.03	6213.4	7588.42	7096.61	7155.82
RAD23A	P54725	1919.44	1896.52	1639.78	1958.23	2539.54	2618.47	2719.97	2289.2	1999.15	2149.56	2241.95	2133.94	1024.65	2574.2	2123.38	2186.52
RAD23B	P54727	2577.11	2705.93	3929.65	3095.12	4026.45	3673.52	4022.99	3087.16	3235.09	3180.47	3749.04	3240.87	1769.29	5057.14	6244.91	6698.48
EPHB4	P54760	799.299	360.411	654.857	454.021	347.567	331.127	448.887	415.174	439.885	604.764	528.128	500.968	1033.28	954.161	923.341	887.428
NAGLU	P54802	880.982	798.319	951.953	1066.7	1042.07	1003.5	1016.68	873.228	447.284	345.392	460.645	428.013	1596.1	1660.9	1439.12	1640.43
AK2	P54819	7576.71	5340.13	5413.06	5736.94	6473.02	6074.38	5967.61	5263.58	6436.51	6961.29	9191.94	6357.91	4281.09	5263.21	5620.96	4927.34
HMGCS2	P54868	1474.49	1322.01	2201.86	2054.06	2189.13	2764.24	2644.45	2280.43	10792.1	10016.2	11447.9	12028.8	6251.99	2849.06	3563.87	5376.37
ALDH18A1	P54886	4554.79	3920.03	3822.12	3791.11	4389.03	4818.66	4775.86	4502.38	8744.69	9258.61	9918.22	9379.8	6667.37	7073.1	6594.96	7095.61
NAPA	P54920	3497.46	3120.2	3405.88	3178.52	3491.57	3257.86	3349.88	3720.98	3051.85	2921.89	3102.58	2965.33	3733.19	3885.53	4043.83	3876.22
EIF5	P55010	6072.33	5366.11	5330.33	5424.32	4710.03	5595.11	5090.65	5262.69	8905.37	8532.52	8821.38	8581.46	5334.72	5195.53	5724.82	5537.43
SLC12A2	P55011	7065.9	6892.46	8010.53	7311.32	1231.4	1392.3	1379.98	1277.43	4509.57	4620.61	4221.41	4833.47	6352.13	5374.1	6659.91	6056.37
PSMD4	P55036	11003.2	8136.75	7578.07	7511.43	6349.65	7218.84	6667.2	6351.48	6591.65	6459.31	6713.33	6240.52	9123.28	8644.05	8926.16	8464.59
DRG2	P55039	1697.1	1775.24	1499.68	1683.44	1676.81	1799.48	1890.14	1956.28	1827.21	1707.04	2006.38	1841.89	1569.49	1617.27	1809.66	1743.66
CSE1L	P55060	8402.62	6736.53	8021.17	7012.41	13403.9	14246.2	13475.6	13195.6	14922.3	14598.2	14250.5	14678.6	18732.6	18671.1	19020	18763.5
TMBIM6	P55061	356.683	485.612	946.714	618.569	522.722	671.534	675.466	492.119	472.658	523.381	414.759	460.744	1297.68	1505.16	1188.1	1717.26
VCP	P55072	33453.3	33177.2	32180.9	34133.4	32272.4	32667	37505.6	39026.4	18741.4	17277.6	18851.6	17956.5	18194.7	17286.7	17369.2	17069.8
MFAP1	P55081	392.504	413.578	496.503	438.724	837.929	770.429	863.67	934.965	957.122	894.344	921.643	901.848	697.133	619.625	659.204	581.593
HADHB	P55084	23393.9	18250.3	20484.5	19784.7	9691.88	10484.7	10512.9	9925.05	12199.4	11906.6	11605.9	12490.8	12242.3	13494.8	12553.1	12588.5
MANF	P55145	2884.85	2779.79	2925.53	2763.02	3333.77	3281.21	2920.84	3045.36	3949.72	3747.1	3909.42	4214.1	1923.52	1731.17	1783.15	1747.32
MTTP	P55157	1027.55	1575.47	1416.35	1111.55	1224.78	1220.94	665.045	1321.89	878.857	904.219	1291.49	670.852	1217.15	1253.79	1045.84	1243.28
AFDN	P55196	1207.51	884.947	1058.21	969.708	373.898	449.7	454.708	392.771	95.1392	430.123	233.244	281.815	1394.23	1220.99	1271.75	1229.95
ELL	P55199	132.235	459.563	142.268	249.166	184.104	164.185	79.1439	222.127	266.396	261.585	261.232	353.019	196.482	193.682	214.376	212.435
NAP1L1	P55209	6899.01	4110.33	4895.21	4049.43	4971.12	5060.64	5387.9	5045.14	5931.99	6556.67	6931.06	6264.25	6124.5	6141.18	6450.2	5837.39
CASP7	P55210	1008.32	562.429	473.648	460.415	680.32	556.215	364.03	563.769	787.12	682.534	519.477	658.909	551.494	491.769	434.629	675.604
CASP9	P55211	123.637	389.832	452.01	403.286	875.186	212.374	749.681	1268.66	129.004	157.383	91.7423	104.876	193.214	246.344	199.746	245.214
CASP6	P55212	627.946	550.179	758.303	672.514	398.204	215.577	232.367	283.487	639.01	656.117	690.963	648.252	764.051	701.456	668.922	768.318
ADK	P55263	1841.06	1983.58	2245.13	2040.88	2023.23	2168.46	2142.33	2255.4	1465.77	1529.04	1461.91	1524.67	2725.46	2567.9	3136.48	2813.84
ADAR	P55265	4460.38	3411.57	3519.25	3412.33	2761.76	2904.3	2871.4	2977.97	3011.19	2958.89	2895.97	2981.38	3186.81	3175.41	3601.57	2982.47
LAMB2	P55268	2699.88	1398.31	1511.5	1301.35	1509.99	1876.32	1083.63	1363.85	614.068	656.511	754.508	720.036	1207.04	1163.61	1249.21	1450.21
FOXA1	P55317	675.923	707.298	624.279	1186.41	126.358	1528.25	154.428	1941.62	1087.02	1162.6	871.697	984.036	6138.86	5933.84	4917.2	3833.31
TPD52	P55327	3858.89	2760.04	3775.54	3323.09	2415.77	2129.17	2020.42	2051.11	2803.57	2627	3294.46	3118.02	1089.55	2433.87	3302.57	3245.62
PKNOX1	P55347	106.342	216.182	199.286	141.163	139.629	191.565	508.803	98.352	137.388	253.784	285.087	263.859	323.895	263.468	514.114	252.75
SEC13	P55735	3749.3	2911.08	2408.66	2635.68	2499.5	2889.53	2190.36	2158.98	1580.83	1734.9	1636.51	1492.45	3151.39	2971.4	4048.46	2961.44
SNU13	P55769	2973.63	1810.71	2763.49	2063.78	2389.92	1810.59	1892.59	1919.85	2655.05	2611.65	2940.52	2578.28	1939.46	1727.7	2041.65	1691.44
NPEPPS	P55786	6190.52	5198.37	5165.11	5169.3	8609.26	8790.44	7663.23	9053.22	5672.07	5056.8	5477.85	5701.11	9957.62	10026.6	9677.07	10225.8
GFER	P55789	568.039	250.591	514.458	317.07	236.269	322.262	352.748	229.746	233.177	188.311	259.777	310.721	458.714	442.978	442.59	348.549
HNRNPH2	P55795	4240.3	3300.92	2602.47	2675.61	3363.8	4557.57	3948.58	3328.71	1703.55	1929.65	2102.57	1656.75	2308.47	2188.36	3081.63	2008.2
OXCT1	P55809	241.958	234.497	185.1	134.059	6333.29	7521.01	6523.23	6673.74	2693.87	2805.07	3091.99	2587.25	2493.28	2897.95	2734.18	2488.17
EIF3B	P55884	4017.43	4624.38	5352.43	5026.98	4914.13	5323.28	5047.53	5134.99	6240.93	5813.41	6038.46	5943.05	6429.62	6481.92	5662.79	6214.07
BID	P55957	551.54	337.884	559.962	324.914	193.508	133.911	170.111	220.614	269.284	262.476	347.86	240.523	162.47	260.869	298.126	275.375
ATP5MF	P56134	13106.3	8895.4	8468.56	7481.65	9856.96	9636.95	9354.83	9265.68	4503.22	5407.17	6224.53	5812.3	6396.56	6774.59	7197.1	6084.04
NDUFV3	P56181	1500.65	798.358	990.731	963.87	723.41	739.486	429.958	368.783	432.968	507.639	638.805	482.114	1068.73	986.696	871.729	848.173
RRP1	P56182	1455.61	1246.18	1409.93	1333.28	1038.07	1133.52	1087.43	1047.55	1871.72	1473.11	1609.7	1806.39	1287.95	1299.57	1248.69	1332.83
MARS1	P56192	15185.7	12832.4	12746.3	11642.1	10017.5	10743.5	9416.97	9461.03	7167.35	8014.23	8334.33	7938.61	12052.1	11427.6	12814.6	12091.9
ITGA1	P56199	572.067	675.909	621.314	623.634	562.39	426.293	465.049	750.41	162.086	141.653	112.948	107.38	104.016	106.469	94.8757	189.706
ARPP19	P56211	2165.93	2059.94	2404.73	2254.67	2198.36	1626.71	2010.58	2227.29	1195.71	1136.74	1187.57	1284.93	6670.14	5973.24	5557.93	6457.1
MAZ	P56270	597.433	1240.71	153.686	88.4981	778.161	648.788	548.444	532.151	387.617	515.788	64.7546	365.764	1155.98	1275.83	1087	834.691
AP1S2	P56377	1237.15	452.026	652.619	593.478	517.649	272.807	476.27	141.201	570.26	410.373	518.776	570.668	718.228	607.36	978.716	849.453
ATP5MJ	P56378	1371.71	1667.02	1531.37	1724.67	1852.53	1690.58	1665.23	1808.22	1900.46	1303.95	1787.77	1160.69	3845.05	1753.81	1779.06	1521.79
ATP5F1E;ATP5F1EP2	P56381;Q5VTU8	4238.63	3825.21	3441.96	3102.29	4117.67	4241.27	3781.87	3973.19	3093.28	3287.88	4167.47	3282.75	3294.22	3337.5	3652.77	3178.62
ATP5ME	P56385	3833.04	2363.97	3508.38	2829.44	4717.09	4690.1	3321.85	2956.6	2371.75	2869.26	5780.68	3460.13	3965.36	3353.65	2575.68	2968.68
LGALS4	P56470	989.795	1716.75	1322.13	860.346	131.116	72.9752	1986.72	66.3086	4039.55	1755.75	2315.45	3689.12	717.553	76.7591	67.4172	569.137
HDAC4	P56524	456.87	262.094	282.442	158.349	246.911	392.726	345.191	258.6	248.447	264.271	290.823	162.958	77.1211	105.768	102.718	154.049
EIF6	P56537	13050.1	14300.2	14570.7	12876.4	12432.7	13021.1	11457	13108.8	19221.2	19165.7	19573.1	18040.6	7925.14	6650.36	7488.84	7805.19
CTBP2	P56545	2028.57	1811.84	2004.52	1847.86	1392.86	1583.99	1332.8	1262.17	2864.74	2837.07	2757.54	2944.55	1393.64	1476.56	1354.79	1496.36
NDUFA6	P56556	5122.35	3764.55	4189.76	4276.06	2505.2	2632.17	2742.53	2442.92	3379.56	2790.86	3191.01	3219.3	2870.37	3107.33	2927.67	2829.15
PEX3	P56589	409.339	352.22	363.037	376.07	324.126	349.42	298.698	360.647	761.506	652.626	768.588	637.32	545.742	679.469	618.074	492.662
HSD17B7	P56937	285.084	249.407	329.643	340.107	364.6	432.371	105.033	616.156	577.359	438.519	310.83	621.127	757.858	472.066	552.904	684.343
BCAR1	P56945	502.671	270.832	352.895	248.788	313.793	342.441	234.722	258.495	422.419	441.668	438.683	533.49	881.659	784.719	855.408	707.946
STX17	P56962	765.398	555.175	648.867	506.695	618.504	377.718	407.014	547.691	368.842	433.746	294.215	315.491	836.671	693.141	783.642	651.174
CFAP298	P57076	527.315	562.792	593.092	676.43	977.253	1054.23	1088.75	989.824	978.167	916.174	941.381	1118.44	899.511	984.864	988.582	908.452
WDR4	P57081	1205.45	614.363	647.589	591.235	369.67	733.336	708.788	463.811	309.327	316.108	330.586	278.582	451.003	413.031	487.825	506.915
TMEM33	P57088	1891.22	2756.05	3173.65	3079.16	4639.77	5434.37	5347.6	5413.48	6335.93	5272.24	5008.36	6689.41	2059.21	2005.31	1569.75	1896.44
GEMIN4	P57678	477.641	486.103	809.433	591.066	997.511	1383.17	1220.85	1004.59	926.784	1006.28	840.825	988.567	1232.54	1231.69	1136.03	1388.85
CORO7	P57737	1052.77	485.336	620.016	565.587	629.463	623.133	575.803	588.544	1380.42	1392.6	1434.91	1486.99	1891.55	1945.91	2146.12	2116.65
NUP107	P57740	2432.55	2233.21	2340.59	2276.33	2520.39	2573.05	2756.64	2706.06	2529.22	2572.51	2445.42	2268.04	2109.9	2076.39	2210.77	1937.68
EEFSEC	P57772	972.108	799.064	817.903	854.977	913.569	733.592	709.597	823.006	982.8	822.547	669.358	814.411	1093.33	1066.01	1243.74	1013.09
EPPK1	P58107	1932.03	1603.06	2164.04	1751.03	6113.16	6647.85	9703.9	5793.94	1094.66	853.505	1004.67	1344.27	11483.8	11114.9	10946.6	10640.2
AP3S2	P59780	1428.46	1129.05	66.6382	1061.59	956.718	1135.55	170.761	841.723	1270.69	1328.73	1389.85	1801.39	90.9096	82.4619	351.805	119.77
ARPC4	P59998	24870.5	19816.8	19417.3	18080.9	16346.4	17847.4	17276.4	17276.2	14903.9	14458.5	16689.1	16397.9	18630.4	18103	18872.7	19122.2
CD81	P60033	1482.2	759.267	704.218	825.592	274.922	783.267	382.859	542.862	290.665	368.862	377.379	451.26	789.034	909.542	1302.45	1059.14
SEC61G	P60059	5004.18	742.117	607.493	907.543	1486.56	1658.11	1115.89	959.876	898.794	809.203	1536.51	936.935	2018.34	885.463	832.266	639.338
TPI1	P60174	140734	148174	131272	120434	111229	101410	87338.1	97904.4	110015	99482.4	114368	107039	160075	146425	178697	151935
EIF3E	P60228	5617.79	5384.34	6459.1	5339.61	4652.33	4835.04	5022.85	5121.21	5670.71	5347.35	5507.5	5764.99	5102.8	5154.46	4717.31	5301.4
SEC61B	P60468	6777.52	5733.6	6060.33	5069.99	7038.51	7363.45	6953.79	8302.59	4010.46	4426.14	3964.19	4969.03	5010.33	4231.35	4448.25	4442.72
PPP4C	P60510	470.037	742.638	1089.32	671.473	510.323	503.732	579.225	674.251	877.961	771.022	667.163	891.18	1119.92	1008	937.808	1162.91
GABARAPL2	P60520	469.803	322.969	365.12	376.021	538.919	389.864	575.505	650.38	1189.95	1128.03	1211.79	1181.49	1976.6	2386.35	2115.68	2090.91
MYL6	P60660	1655.25	595.619	2143.26	811.025	5457.86	2337.14	4581.46	752.972	1034.79	2080.9	956.021	826.322	660.312	731.416	652.452	502.001
ACTB	P60709	599384	487883	474103	487074	405510	406734	452473	419404	286813	286781	334093	332954	428431	369076	386816	404473
EIF4A1	P60842	28478.3	29496	31666.9	29941	36942.4	38471.3	42047.4	40306.7	35361.9	35844.1	37076.2	37788.2	38719.1	38468.3	33764.4	38595.2
RPS20	P60866	31405.4	25833.7	23779.8	24279.3	26935.5	27407.9	28626.7	27574.7	23764.9	24360.2	27693	25124.6	25297.3	25329.8	26568.3	24512.9
PRPS1	P60891	2349.83	2058.78	2562.12	2433	2673.95	3012.62	2951.12	2926.73	1998.78	2029.51	2010.86	2060.47	842.542	646.409	634.436	772.357
PSMA6	P60900	12771.8	11772	12226.7	10634.7	11841.4	11724	12247.8	12798.6	11548.9	11200.8	11253.1	12346.6	11588.8	13016.4	13483.6	12291.5
S100A10	P60903	6261.87	16411.2	19435.4	18527.8	3976.47	3521.04	3258.46	3146.26	6071.84	4390.32	7670.71	5659.69	3072.46	3137.26	3245.96	3488.71
CDC42	P60953	4606.95	7623.09	7646.83	7359.92	6434.13	7057.82	7272.27	7178.39	5281.33	5428.81	5542.38	5248.52	4852.57	5041.52	5143.75	4862.15
DSTN	P60981	11905.7	16094.3	15041.8	14302.4	6924.68	7255.97	5954.31	6889.55	5610.18	4896.36	5138.99	5702.98	8166.5	8610.48	12447.6	8774.69
GMFB	P60983	1586.8	1506.36	1990.2	1683.56	1062.56	1003.63	974.604	646.403	694.578	874.251	746.875	779.297	824.383	1561.84	1836.16	1850.8
RAB8A	P61006	22080.7	19816.8	21448.5	21108.7	21637.2	21055	24517.1	21935.7	24053.3	22165.8	23865.9	23879.8	32426.1	34069.7	33450.4	32407.1
SPCS3	P61009	3664.82	4000.69	3849.93	3719.82	3635.58	4269.42	3478.14	4246.8	2306.81	2036.84	1767.55	2296.41	2421.66	2120.99	1883.29	2553.34
SRP54	P61011	3889.19	2935.28	2901.93	2607.2	1964.55	1838.74	2258.35	1786.68	2599.82	2746	2540.55	2334.77	3435.8	3387.03	3456.29	3374.74
RAB4B	P61018	811.02	720.434	862.069	852.578	455.485	345.761	514.029	363.49	323.326	311.269	452.771	196.713	793.515	838.758	688.552	698.218
RAB2A	P61019	3444.71	3475.94	3592.5	3533.75	2260.46	2136.44	2093.14	2328	3013.77	2715.09	2830.61	2760.57	3864.6	3769.68	3850.78	3618.08
RAB5B	P61020	4064.6	2443.21	2717.49	2739.2	2800.06	2571.7	2362.5	2873.9	2180.67	1956.59	1963.99	2248.02	4283.39	3832.72	4725.6	4497.68
CKS1B	P61024	117.599	70.689	215.25	199.209	97.9317	367.196	338.124	282.863	561.478	451.533	856.784	623.046	885.346	680.845	582.554	511.386
RAB10	P61026	10152.7	10403.6	10808.7	10301.3	2960.23	2840.68	3357.83	4061.55	4850.07	4266.64	4464.14	4936.3	6286.18	6528.61	5548.53	5830.25
UBE2D3	P61077	2440.97	2389.18	2368.2	2149.29	2729.06	2832.09	2134.54	2632.69	3095.99	2994.67	3821.33	3499.86	2275.23	2195.68	2319.39	2678.49
UBE2M	P61081	5955.49	6387.62	5556.07	5044.69	5096.28	5549.1	5683.79	5305.87	6315.31	6124.92	6804.79	6624.54	5216.96	5563.85	6192.59	6413.73
UBE2K	P61086	2090.81	1984.4	2959.7	2321.56	2828.12	2302.07	2803.94	2785.65	4184.6	4271.52	4281.41	4458.68	3153.19	3650.38	3654.72	3963.74
UBE2N	P61088	4280.19	3407.67	4567.48	3750.28	4286.7	4075.29	3712.92	3530.31	9338.39	8360.29	12188.5	9259.26	5668.81	7916.83	6580.91	7934.18
RAB14	P61106	2404.03	2297.47	2097.2	2223.89	4298.48	4419.75	4393.53	4787.63	2964.47	2676.01	2672.9	2982.35	4505.29	4100.97	4281.13	4362.29
ACTR3	P61158	11249.2	9220.15	10022.3	9509.09	7389.94	7978.97	7880.61	7370.25	8058.39	7295.43	7678.59	8219.06	8894.07	8327.74	8561.89	8071.17
ACTR2	P61160	2429.35	2986.93	3200.2	3135.5	2083	2524.35	2544.75	2446.66	2726.41	2466.81	2622.13	2741.47	2963.61	2849.34	2613.36	2716.3
ACTR1A	P61163	8588.43	8450.6	8479.34	8604.23	7110.6	7835.6	7082.32	7500.44	5971.55	6219.06	5667.45	5882.72	7383.77	7163.52	7327.3	7301.02
TMEM258	P61165	2277.46	1438.9	493.511	1037.01	1537.81	2523.29	1225.98	1478.68	1364.17	875.247	2230.45	671.394	2524.09	1897.74	2266.95	1484.09
COPS2	P61201	1240.63	1401.16	1537.46	1454.46	2085.5	2082.7	2107.07	2081.08	1608.97	1501.8	1627.47	1636.8	1395.88	1323.11	1205.94	1420.55
ABCE1	P61221	3851.74	3267.43	3344.67	3255.37	3142.22	3361.66	3360.38	3401.14	3013.68	2944.78	2834.99	2951.53	3330.43	3259.75	3267.73	3281.13
RAP1B	P61224	18462.7	16431.5	17720.2	19327.9	16875.2	20225.6	17799.1	17540	13443.2	12029.3	12519.7	14001	14415.8	14140.8	12123	15327
RAP2B	P61225	959.438	554.412	519.649	490.018	201.664	248.218	181.866	207.944	465.914	602.453	413.198	576.452	543.432	452.779	536.473	509.158
MAX	P61244	521.236	512.596	479.658	619.208	563.884	173.451	617.07	687.298	769.458	740.941	820.226	531.894	532.321	581.242	482.028	508.214
RPS3A	P61247	53699.2	42824	39337.7	39896.6	42864.3	45424.1	46077.1	44672.4	40060.8	40464.4	43590.8	39602.2	41970.3	41316.5	41616.4	37333.4
RPL26	P61254	14922.8	13759.9	14247.7	13913.4	14179.9	13810.2	14966.1	13358	17028.3	17188.1	18872.7	16558.5	16434.4	15585.7	14282.2	13974.2
PSME3	P61289	2882.84	2510.15	2629.75	2454.6	3103.03	3265.81	3848.15	3312.54	4040.75	4109.69	4382.54	4261.51	2377.12	2385.97	2092.46	2172.17
RPL15	P61313	25614.9	24014.3	28130.4	26153.3	24288	25010.3	25354.1	23997.3	34667.6	31954.4	31869.2	31158.1	28652.1	29103.4	26982.7	23669.4
MAGOH	P61326	1288.61	929.584	102.071	619.308	698.962	946.484	434.99	557.592	1385.97	1851.84	1882.8	1029.33	1175.96	1107.95	1195.35	800.873
RPL27	P61353	34319.9	38561.6	38297.8	40716.5	36364.4	34765.9	43019.5	38698.6	43911.2	45650	48602	45201.9	39486.7	37386.4	35455.3	33535.4
ATP6V0D1	P61421	2811.5	2343.8	2297.95	2134.96	3689.37	3609.41	3636.3	4531.46	2470.91	2248.41	2342.94	2482.95	4409.71	4837.64	4854.91	4797.96
PCBD1	P61457	11428.3	14183.8	13469.7	13969.6	2724.52	3034.21	2559.71	2385.31	11815.4	12727	10990.2	13151.1	3407.27	5115.46	7400.43	6020.93
RPL37A	P61513	4549.42	3101.94	2576.85	2596.45	2496.31	3000.87	2381.58	2806.58	3491.28	3462.5	3830.99	3343.44	3145.96	3348.57	3738.8	2902.19
RHOA	P61586	2089.97	1963.17	2160.75	1852.98	2977.38	2886.92	3389.91	3114.48	3371.66	3116.43	3083.58	3057.49	2379.64	2303.25	2596.86	2423.34
[truncated: 3,977 more rows]
