# Supplementary material for: Beyond One-Size-Fits-All: Cancer Biology Shapes Nanoparticle Behavior
Source: Research Square preprint supplement (doi:10.21203/rs.3.rs-7865764/v1), 2025-11-03
Supplement: Supplementary file 5 [file f87762d7aa2a416999a487f4.xlsx]

## Sheet: Sheet1
Gene	Protein	A549_R1	A549_R2	A549_R3	A549_R4	Hela_R1	Hela_R2	Hela_R3	Hela_R4	KM12C_R1	KM12C_R2	KM12C_R3	KM12C_R4	MCF7_R1	MCF7_R2	MCF7_R3	MCF7_R4	Ratio A549	Ratio HeLa	Ratio KM12C
MYO1C	O00159	6996.62	6316.32	6725.89	6211.92	2662.17	2869.21	2365.63	2530.44	2444.98	2408.4	2120.81	2397.72	3446.29	3421.14	3320.64	3101.91	1.97523	0.784609	0.705186
SNAP23	O00161	799.448	738.412	641.543	624.723	736.681	713.095	704.555	593.65	596.93	782.55	783.408	674.399	370.836	359.238	306.675	280.935	2.12807	2.08546	2.15324
STXBP3	O00186	2229.61	1596.72	1499.11	1616.22	729.111	800.45	819.037	821.77	1004.03	983.947	1004.69	906.946	1625.9	1639.19	1595.96	1596.25	1.07501	0.490974	0.603907
WASL	O00401	5597.47	5113.88	5470.01	4947.58	3800.6	3652.87	4134.9	3935.03	3488.73	3678.49	3327.58	3546.2	4356.13	4601.84	4803.3	4671.07	1.1463	0.842183	0.76176
GOLIM4	O00461	734.144	730.223	888.272	802.795	856.058	1193.37	980.442	1006.23	437.046	557.163	514.425	509.955	432.131	352.444	274.071	385.895	2.18439	2.79404	1.39739
PIK3C2B	O00750	4617.26	1614.66	2338	1767.05	1961.27	1655.35	75.718	1733.84	1186.07	1466.11	1384.01	1770.76	1655.54	1633.54	1392.66	2298.3	1.48093	0.777385	0.831936
DVL2	O14641	216.022	203.678	235.617	161.062	342.751	394.587	304.703	286.092	311.123	295.696	312.303	301.37	346.287	330.761	300.919	390.596	0.596522	0.970458	0.891805
HGS	O14964	2657.66	2478.13	2678.77	2798.67	1876.33	1575.85	1795.15	1691.36	2069.47	1923.23	1916.09	2003.04	2736.6	2552.04	2708.37	2862.36	0.977335	0.638959	0.728572
STX7	O15400	2962.7	1907.82	2127.81	1732.93	1195.59	1347.01	1149.88	883.368	2324.02	2297.25	2434.93	2498.49	1438.39	1596.55	1818.04	1763.58	1.3196	0.691575	1.44406
TAPBP	O15533	2389.99	1954.32	1817.03	1845.86	4944.41	4599.14	3990	5544.71	1481.76	1384.54	1437.17	1516.74	1137.82	1022.12	1218.16	1130.97	1.7758	4.23108	1.29078
TGOLN2	O43493	639.589	655.864	832.464	721.73	278.731	246.079	256.163	309.146	382.663	369.492	405.358	366.794	353.416	333.263	301.84	366.967	2.10231	0.804227	1.12455
STX6	O43752	629.183	365.548	441.395	350.816	557.659	846.476	605.768	585.884	490.359	531.66	516.213	455.718	972.47	916.054	1170.77	946.104	0.446133	0.648072	0.497815
SNX3	O60493	5589.58	5384.39	6022.25	5222.36	4146.45	3841.17	3950.29	4439.31	6171.65	5729.53	6395.01	5798.25	5084.12	5513.48	5658.56	5172.26	1.03687	0.764276	1.12442
SRGAP2	O75044	224.86	239.507	436.281	413.749	471.107	462.129	560.807	379.472	308.279	366.962	359.09	367.422	552.638	485.225	534.061	651.104	0.591264	0.842776	0.63056
FLNB	O75369	18184	20072	20168.7	19382.3	10216.9	9870.53	13547.6	13702.1	18062.9	15270.5	14909.5	18415.5	9871.64	10752.3	10371.1	10244.9	1.88669	1.14785	1.61635
SEC22B	O75396	3740.12	3227.22	4126.14	3774.4	5940.86	6869.34	6870.06	7461.23	2276.92	2062.3	2242.02	2383.01	9135.36	8514.32	8403.15	9108.53	0.422847	0.771913	0.254946
STAM2	O75886	2177.09	1287.09	1357.63	1260.93	419.919	716.214	775.314	868.877	538.157	618.058	599.848	841.591	1173.48	819.707	904.271	1138.17	1.50727	0.688946	0.643682
AP2A2	O94973	3420.64	2545.25	2049.89	2502.7	712.195	851.036	713.805	731.466	1286.57	1222.88	1054.04	1085.7	866.317	916.061	894.424	895.246	2.94466	0.842235	1.30155
FMNL1	O95466	825.665	767.612	542.012	631.072	1194.03	1456.58	1146.83	1232.77	95.7467	142.275	161.103	94.7566	399.77	158.661	77.1524	246.035	3.13782	5.70565	0.560199
AP2A1	O95782	13691.8	13147.4	12679.9	12668.7	13646.5	14501.2	12112.3	14050.3	5155.78	5298	5308.08	5105.83	14583	15399.4	15499	14316.7	0.872732	0.908229	0.348969
EGFR	P00533	1984.35	1522.32	1980.39	1742.59	1063.57	1029.56	1268.57	1290.17	518.495	608.224	501.85	591.004	141.426	260.673	510.443	174.73	6.64935	4.27847	2.04141
HP	P00738	158.394	222.39	429.337	669.254	240.777	373.172	213.583	56.2175	95.0611	61.9461	475.42	124.974	173.835	138.865	128.028	172.858	2.41103	1.4403	1.23438
LDLR	P01130	85.9181	167.769	316.49	313.167	463.943	519.28	319.266	663.017	1606.02	1369.41	1216.03	1671.14	195.083	185.1	179.015	260.279	1.07794	2.39849	7.15408
HLA-B	P01889	2516.24	1875.46	2070.53	1819.07	22412.9	20026.9	18551.3	26111.9	720.564	615.887	623.526	539.375	638.732	406.035	296.334	275.387	5.12302	53.8841	1.54616
HLA-H	P01893	137.351	303.922	290.545	511.963	2626.67	2741.4	2613.88	3285.12	52.1856	94.3382	68.0275	137.846	144.927	63.5294	245.955	157.827	2.03153	18.403	0.575587
APOA1	P02647	20597.3	20822.5	22800.3	13990.8	23143.6	26188.1	91.1141	88.0486	18483.7	87.8789	18372	17533.7	46658.5	25724.2	185.662	26934.3	0.786018	0.497584	0.547495
TFRC	P02786	4336.42	4054.33	4482.26	4164.84	10676.1	11220.3	9581.55	11037.4	5108.46	9311.07	5733.67	5224.01	3191.39	3069.35	3344.85	4081.76	1.24479	3.10618	1.85406
TF	P02787	923.505	573.59	722.641	558.231	645.991	1296.51	716.15	510.064	452.941	547.746	580.097	391.742	806.031	615.338	751.173	1066.02	0.857777	0.978432	0.609074
LTF	P02788	916.614	871.247	1228.04	660.316	1820.9	2716.98	2027.66	2277.63	903.848	1553.3	1191.73	1033.48	957.571	1218.08	1450.79	682.265	0.853207	2.05239	1.08672
APOB	P04114	785.97	351.032	342.175	480.593	515.15	389.808	300.436	382.793	745.065	985.773	944.514	828.337	607.975	703.266	790.317	644.674	0.713621	0.578315	1.27582
HLA-A	P04439	2720.42	2179.79	2718.72	2563.87	13574.2	17698.2	17084.8	20643.2	72.9355	80.0524	140.283	71.9358	1147.53	814.867	695.845	980.088	2.79876	18.9648	0.100378
GSN	P06396	5489.26	4770.26	5249.02	4910.95	3860.12	3731.13	3581.26	3640.32	1000.62	687.332	734.891	1154.87	9796.67	7377.58	8104.68	8515.07	0.604234	0.438327	0.105868
ITGAV	P06756	4647.89	3681.18	3889.86	3785.47	2386.72	2464.73	2151.35	3023.1	967.879	983.408	833.997	901.361	1739.36	1678.16	1586.13	1661.55	2.40119	1.50422	0.553119
CTSL	P07711	3233.32	4008.91	3663.93	3561.31	1195.2	1415.92	1510.46	1247.17	358.075	131.293	408.38	117.29	1122.05	977.858	1046.44	1195.82	3.33185	1.23642	0.233763
HSP90AA1	P07900	35421.7	38792.2	46965.9	41125.8	33869.7	34190.9	40800.8	35200.5	67780.6	66494.7	64225.6	71292.6	66448.7	60621.5	61811.1	64664.1	0.640144	0.56819	1.06408
LYN	P07948	1464.42	1086.04	904.493	1006.38	495.474	849.426	251.155	499.535	3232.74	3365.44	3252.27	3295.81	61.7519	124.274	571.307	159.76	4.86463	2.28503	14.3347
VIM	P08670	33039	30770	35496.2	31534.1	37166.4	34314.8	44284.3	46754.6	1021.91	1025.57	1127.66	1174.36	685.708	432.69	899.636	987.605	43.5313	54.0717	1.44712
CLTA	P09496	3626.3	3060.52	4452.26	3821.62	4251.71	4278.82	4357.67	3477.21	2670.18	2777.86	5216.95	2610.57	918.21	2656.37	2683.91	2713.34	1.66752	1.82409	1.47969
CLTB	P09497	4487.28	3659.41	4081.62	3812.12	3461.89	3525.54	3569.51	2837.65	2654.81	2906.78	3714.41	2754.82	1580.62	3605.73	3671.26	3907.63	1.25657	1.0493	0.942467
HLA-C	P10321	3134.47	2182.43	2672.45	2525.14	21087.4	22486.9	23109.4	27707.5	1043.1	991.361	964.62	1275.43	1353.79	675.037	1021.09	1252.18	2.44403	21.9407	0.993585
RALA	P11233	1072.59	1353.77	1542.39	1448.26	1511.82	1520.05	1475.17	1361.56	1871.92	1378.77	1348.63	1641.15	1055.64	1094.26	1063.76	1236.59	1.21724	1.31871	1.40227
LAMP1	P11279	4811.72	4231.59	4469.76	4161.02	13292.4	12777.2	9602.54	14690.6	8143.32	6894.28	6706.94	7806.48	4901.02	5044	5348.84	5542.43	0.848236	2.41707	1.41825
IGF2R	P11717	1434.7	1124.22	1146.9	1097.43	2579.8	2625.3	2241.35	2332.32	66.324	71.2594	92.6799	99.3749	1074.29	1042.02	1221.14	1191.13	1.06065	2.15935	0.0727906
ANXA3	P12429	8891.16	7291.81	7578.61	7564.89	8701.43	8541.61	8126.98	10136.5	10508.3	8322.18	9370.43	10707.8	1763.96	1219.6	1494.93	1347.08	5.3774	6.09494	6.67896
LAMP2	P13473	6598.08	5291.88	6185.03	6021.53	4315.2	5271.69	4666.69	7233.32	3611.65	2945.89	4231.21	4200.64	4424.6	4177.29	3155.91	5180.57	1.4226	1.26853	0.884936
CYBA	P13498	2583.08	2204.04	1240.11	1734.32	1034.9	804.356	532.699	853.374	2030.93	1886.15	2016.82	1997.03	76.6213	98.3988	9.59651	109.225	26.414	10.9764	26.9905
HSP90B1	P14625	68040	64215.6	70439	64996.9	40968.6	41320.7	42217.9	45030.9	58898.4	53265.8	56963.1	62348.9	44022.8	37879.2	37649.2	40304.5	1.67458	1.06057	1.44803
ITGB5	P18084	3621.17	3427.18	4327.61	4197.98	1102.11	1146.06	914.941	1572.57	795.244	715.435	672.81	884.193	1527.36	1814.16	1709.87	1721.78	2.29936	0.699183	0.452917
RAB5A	P20339	6724.99	8000.67	7466.79	7624.16	5726.48	6327.97	6631.11	7385.94	5999.05	5860	5863.94	6268.56	10442.6	9631.02	9763.65	10257.7	0.743648	0.650242	0.598367
M6PR	P20645	4588.83	3570.77	5023.32	3159.47	5216.42	5161.79	4973.02	5695.08	3500.97	3547.55	3373.49	3468.49	2374.11	2259.27	2487.37	2805.73	1.64634	2.12022	1.39934
CD9	P21926	1575.04	1984.03	1661.39	2035.34	1695.07	1742.52	1777.89	2474.73	3443.54	2679.86	2539.17	3874.06	3656.39	4468.91	4112.71	4334.62	0.437818	0.464031	0.756466
ATP6V0C	P27449	465.327	963.936	1401.76	905.394	1437.23	796.434	1847.02	1372.21	1100.19	925.656	1094.03	2147.66	1133.94	1049.34	2279.3	2707.23	0.521132	0.760535	0.734683
DPP4	P27487	755.632	24.4146	102.897	375.168	114.81	133.902	81.5674	74.8742	1400.37	1298.33	1215.96	1304.52	24.9768	238.308	668.979	95.5212	1.2241	0.394201	5.07809
CALR	P27797	24411.6	25252.2	29837.6	25118	39121.4	42155.3	38445.2	44535.9	26161.5	22176.8	23566.6	24869.1	24230.2	23863.8	21282.2	22626	1.13714	1.78537	1.05186
PDIA3	P30101	35904	32663.5	31601	32766.1	42037.9	41517.4	43093.9	48799	35278.6	31652.1	34290.4	36483	24675.6	23477.4	22569.1	24034.9	1.4029	1.85156	1.45324
CORO1A	P31146	61.7705	99.8558	83.0899	44.1958	85.866	456.212	149.765	70.8722	256.04	298.5	311.411	318.149	773.914	470.791	470.941	464.841	0.132499	0.349791	0.543044
ARRB2	P32121	518.637	786.592	649.778	638.103	435.806	279.165	480.473	354.498	395.748	327.23	389.356	369.995	342.82	248.739	289.23	363.26	2.08441	1.24588	1.19154
KIF5B	P33176	4927.02	4348.87	4796.52	4884.18	3563.31	3884.21	3951.87	3962.76	5218.67	5202.47	5026.43	5220.85	5732.88	5352.07	5399.34	5688.58	0.854945	0.692836	0.932149
MTOR	P42345	1064.81	859.094	855.312	884.618	1114.93	1108.45	1021.25	1207.87	717.89	762.454	763.798	759.678	735.602	766.612	685.967	726.161	1.25717	1.52779	1.0307
ARRB1	P49407	3255.73	2967.62	2904.63	2665.87	113.159	102.599	78.1887	62.7029	358.734	394.602	431.379	377.987	566.236	633.519	983.928	696.252	4.09518	0.123839	0.542617
DNM2	P50570	8203.21	5545.2	5996.52	5829.38	3369.36	3207.44	3033.23	3074.87	5537.1	5235.18	4981.85	5711.45	6514.6	6136.59	6449.15	6165.54	1.01221	0.502057	0.849588
ANXA11	P50995	8706.93	7644.85	8977.38	8374.77	5551.13	5661.03	4990.47	5219.78	8596.02	8783.85	9024.2	9582.97	4403.64	4737.64	5069.17	4618.72	1.78999	1.13773	1.91124
RAB5C	P51148	8221.54	7113.6	7346.46	6411.75	5664.91	5835.23	6003.26	5735.06	6056.63	5502.79	5914.67	5306.99	7533.7	8097.98	7860.16	7917.28	0.92627	0.739863	0.725301
RAB7A	P51149	13381.4	10800.1	11369.7	10576.9	14009.1	15286.5	14206.3	14975.9	18133	16787.2	16743.3	18299.7	29125.5	29582.9	27910.8	29295.3	0.397949	0.50449	0.603576
RAB9A	P51151	1023.54	550.665	854.095	688.658	1397.8	1196.87	1527.31	1561.85	398.963	410.538	321.843	516.607	1553.98	1560.85	1856.5	1813.61	0.459393	0.837711	0.242883
RAB13	P51153	2727.26	2278.79	2481.95	2183.57	1337.1	1565.14	1448.51	1652.58	1403.51	1614.49	1449.91	1353.65	2531.03	2886.23	3172.84	2387.95	0.880993	0.546849	0.530291
VAMP7	P51809	943.691	551.402	605.672	703.811	822.421	911.836	969.422	1013.98	463.157	423.29	415.121	549.141	612.453	646.406	540.507	650.283	1.14489	1.51763	0.7555
AP2S1	P53680	9634.52	5269.73	5050.47	5787.96	3277.36	3881.9	4174.79	4317.12	3072.48	3341.85	2823.91	3288.22	4296.51	4621.32	4121.37	4633.33	1.45665	0.885621	0.708809
CDC42	P60953	4606.95	7623.09	7646.83	7359.92	6434.13	7057.82	7272.27	7178.39	5281.33	5428.81	5542.38	5248.52	4852.57	5041.52	5143.75	4862.15	1.36868	1.40415	1.08045
RAB8A	P61006	22080.7	19816.8	21448.5	21108.7	21637.2	21055	24517.1	21935.7	24053.3	22165.8	23865.9	23879.8	32426.1	34069.7	33450.4	32407.1	0.638101	0.673538	0.709955
RAB5B	P61020	4064.6	2443.21	2717.49	2739.2	2800.06	2571.7	2362.5	2873.9	2180.67	1956.59	1963.99	2248.02	4283.39	3832.72	4725.6	4497.68	0.690018	0.611795	0.48152
RAB10	P61026	10152.7	10403.6	10808.7	10301.3	2960.23	2840.68	3357.83	4061.55	4850.07	4266.64	4464.14	4936.3	6286.18	6528.61	5548.53	5830.25	1.7222	0.546438	0.765375
RAB14	P61106	2404.03	2297.47	2097.2	2223.89	4298.48	4419.75	4393.53	4787.63	2964.47	2676.01	2672.9	2982.35	4505.29	4100.97	4281.13	4362.29	0.523059	1.03767	0.654837
ATP6V0D1	P61421	2811.5	2343.8	2297.95	2134.96	3689.37	3609.41	3636.3	4531.46	2470.91	2248.41	2342.94	2482.95	4409.71	4837.64	4854.91	4797.96	0.507308	0.818326	0.505032
STXBP1	P61764	650.403	589.924	573.434	669.755	2736.14	2854.35	2035.31	2462.49	1069.62	923.996	830.383	887.96	1003.76	886.104	806.28	803.312	0.709685	2.88281	1.06072
B2M	P61769	152.022	83.8302	481.696	205.352	2241.2	1745.49	1332.72	1603.85	364.522	357.599	369.508	435.422	284.729	99.8625	81.8776	184.547	1.41763	10.6345	2.34564
ARF6	P62330	2312.32	3334.51	3770.9	3638.98	2026.98	1890.76	1750.58	2182.63	3076.79	2987.28	2341.25	3118.87	3295.36	2967.72	2937.66	3394.21	1.03666	0.623341	0.914984
RAB11A	P62491	30233	31613.3	33423.9	31520.6	18768.9	18722.4	22245.6	19535.4	21929.7	19256.3	20574.7	20841.1	20250.4	22213.2	23120.7	24626.5	1.4055	0.878745	0.915654
RPS27A	P62979	31551.8	40914.4	31879.6	31523.9	61681.7	62119.9	59084.4	57886.1	47064.2	51363.5	57089	47610.2	46346.4	51696	70325.6	51080.4	0.619142	1.09717	0.925625
UBA52	P62987	120.916	165.605	186.342	195.79	188.046	115.065	129.814	252.818	260.078	228.293	180.969	254.14	214.85	267.113	327.817	214.844	0.652584	0.669262	0.901285
AP2B1	P63010	8652.08	8483.8	9138.55	9312.43	5855.37	6252.08	4907.75	6046.02	5064.97	4883.01	4358.52	4796.33	7088.7	7804.57	8141.16	7650.96	1.15973	0.751537	0.622538
VAMP2	P63027	3137.06	2283.34	2161.37	1761.8	2027.77	2144.03	1892.97	2422.04	1230.25	1052.51	1080.71	1089.46	779.922	834.397	1006.4	869.476	2.67709	2.43162	1.27584
ACTG1	P63261	521587	76840.3	67787.9	61043.4	52697.7	73460.7	61916.5	55622	38830.1	36639.9	36906.3	44381.6	50581.4	46379.8	61963.1	51969	3.44847	1.15555	0.743304
HBB	P68871	2488.36	2232.71	1876.81	1212.48	3261.98	2844.69	4291.15	2678.22	821.815	985.642	879.482	999.226	1357.62	700.984	771.063	1070.98	2.00232	3.35227	0.945013
HBA1	P69905	1792.3	2223.01	2318.31	1691.6	3635.02	3271.96	3862.91	2714.13	1215.98	1015.01	1318.22	1316.88	1519.98	1244.2	1280.05	1253.42	1.51486	2.54528	0.918538
CLTC	Q00610	22671.3	24344.5	26448.7	25247.1	21327.5	22845.9	22094.9	24444.1	17035.6	16742	16679.9	17288.9	26078.2	25931.2	25035.9	26971.5	0.948998	0.872095	0.651303
OCRL	Q01968	1019.39	759.104	956.29	824.205	609.884	678.668	529.461	674.469	459.423	465.873	415.723	480.998	623.065	518.534	581.89	596.385	1.53413	1.0744	0.785395
CAV1	Q03135	1403.15	2180.4	2228.49	1724.41	1425.48	1386.39	1381.25	1904.63	574.435	586.831	502.878	865.701	96.1842	50.5404	93.8538	76.8257	23.744	19.2113	7.97043
TAP1	Q03518	824.039	775.522	822.055	970.923	1793.69	1800.35	1783.74	1888.14	651.901	576.777	576.501	817.315	483.744	638.568	484.857	462.147	1.63945	3.51126	1.26732
TAP2	Q03519	3101.95	3693.4	3309.92	3205.53	8387.05	7645.95	9533.49	11093.6	3110.7	2552.05	3489.75	4164.2	3161.45	2005.86	2842.76	994.595	1.47821	4.07123	1.47887
ATP7A	Q04656	975.916	592.296	662.294	516.62	412.814	342.816	453.32	462.668	67.6906	143.411	174.43	183.89	269.468	443.449	481.603	385.2	1.73899	1.05817	0.360457
DNM1	Q05193	9355.75	4546.35	4576.01	4882.78	1212.15	1663.95	654.849	780.275	805.909	662.87	576.531	990.454	903.735	489.402	658.661	556.02	8.95802	1.65319	1.1641
LRP1	Q07954	1314.88	1116.61	1292.54	1118.38	861.88	794.431	699.38	750.104	134.559	104.335	225.131	307.044	294.721	205.027	176.787	256.926	5.18758	3.32718	0.826034
STX4	Q12846	1580.24	1581.15	1817.03	1883.48	813.835	726.026	927.3	886.482	922.453	893.779	934.997	973.577	1381.1	1238.57	1337.96	1493.65	1.25877	0.615203	0.68329
MYO1E	Q12965	2877.35	2456.32	2477.6	2441.69	1395.17	1480.39	1638.65	1642.99	1801.14	1724.44	1637.74	1837.12	288.131	196.369	250.744	297.403	9.92881	5.96253	6.77913
PLD1	Q13393	459.057	402.301	310.035	300.871	377.388	400.443	385.473	409.524	166.949	144.233	173.329	142.803	149.786	105.43	109.185	160.34	2.8057	2.99735	1.19548
TCIRG1	Q13488	430.339	382.155	414.814	326.987	809.968	863.755	743.681	988.993	83.2477	86.4489	78.0309	114.656	245.415	208.715	190.761	247.779	1.74117	3.81596	0.405955
PICALM	Q13492	2233.83	2251.7	3009.47	2609.56	1453.1	1652.75	1579.78	1660.74	1527.31	1495.03	1123.14	1524.17	2166.68	1924.64	1777.48	2350.78	1.22933	0.772105	0.689774
CAMK2B	Q13554	3870.38	2716.85	2758.93	2523.57	1364.61	1301.44	1542.12	1455.78	1426.43	1343.81	1210.39	1257.86	1225.47	1293.46	1070.26	1166.7	2.4958	1.19093	1.10147
CAMK2G	Q13555	310.39	395.815	408.631	276.665	240.103	337.033	248.99	274.094	367.115	182.997	77.0476	259.114	540.643	478.116	580.086	447.276	0.680068	0.53771	0.433148
CAMK2D	Q13557	7997.43	4962	5919.62	5256.45	1831.46	2087.84	2420.91	2662.21	1817.39	1956.02	1913.68	1732.78	1249.57	1211.61	752.714	1256.48	5.39898	2.0138	1.65979
RAB31	Q13636	170.219	213.138	202.214	151.082	650.907	328.985	777.971	706.546	83.1915	95.1554	87.2928	81.7628	741.66	710.046	613.433	751.959	0.261494	0.874804	0.123319
RAB32	Q13637	657.393	648.416	687.363	713.69	628.855	842.306	842.398	808.967	113.213	255.936	135.862	229.595	417.473	253.418	402.834	397.279	1.84015	2.12272	0.499391
RIN1	Q13671	5105.96	3144.25	3809.5	3250.47	3258.83	3087.78	3335.01	2193.98	5112.22	5309.41	6391.28	6157.94	4409.26	3903.32	3270.88	4210.09	0.969395	0.751928	1.45444
SCARB2	Q14108	1431.09	1464.45	1751.06	1646.01	2183.6	1738.36	1532.32	2585.25	2551.59	1851.56	2134.11	2754.89	2183.77	2404.34	2007.28	2230.91	0.712939	0.91086	1.05278
CTTN	Q14247	13918.7	12970	15985.2	13978.8	10551.5	10176	10764.8	10394.6	10508.4	10429	10063.2	10639.8	12362.8	11274.7	15756.8	12589.1	1.09367	0.805777	0.801035
FLOT2	Q14254	2712.83	2201.92	2578.21	2335.43	2403.19	2473.1	2075.91	2998.76	496.861	547.822	643.124	520.389	1229.21	1546.64	1735.13	1593.03	1.61015	1.63023	0.361761
GAPVD1	Q14C86	1052.47	720.773	741.806	777.972	2408.5	2430.91	2660.64	2471.66	1265.25	1197.95	1243.27	1157.76	1933.54	1724.61	1651.87	1740.66	0.467051	1.41429	0.689896
RABEP1	Q15276	1296.34	629.176	774.903	671.076	1213.82	945.927	954.085	1052.64	844.987	862.772	1202.5	1018.75	1733.89	2081.78	1332.98	1581	0.500991	0.619123	0.583836
RAB35	Q15286	3315.97	2557.2	2577.77	3055.25	2005.64	1964.48	2080.63	2066.3	4057.36	3536.83	3832.49	4145.65	3232.47	3264.91	3635.54	2980.15	0.87746	0.619004	1.18754
VAMP3	Q15836	1981.68	841.601	618.746	980.266	1111.69	972.089	803.389	881.164	469.479	589.495	425.025	551.317	464.808	440.825	537.431	254.863	2.60453	2.21937	1.19871
RAB11B	Q15907	3238.97	3960.47	4888.49	4191.84	2478.82	2646.97	3045.51	3250.19	1568.93	2002.45	1555.41	1877.07	2693.97	2964.94	2406.06	3284.19	1.43445	1.00637	0.617127
ZYX	Q15942	4070.9	2830.39	3233.92	2728.27	3867.1	3682.88	3460	3505.82	2308.54	2480.93	2390.55	2502.74	1348.37	1875.08	2582.41	2207.89	1.60518	1.81136	1.20827
OCLN	Q16625	1470.24	1080.34	1577.69	1168.27	177.415	1922.81	158.915	62.275	1666.71	1654.74	1652.97	1903.02	2501.6	2033.93	1828.6	2322.84	0.60971	0.267229	0.791696
VPS26B	Q4G0F5	1058.15	1061.12	898.824	844.542	606.878	858.864	623.012	615.059	764.194	832.808	776.832	726.863	1190.56	1177.45	1208.68	878.702	0.866958	0.606863	0.695942
ECPAS	Q5VYK3	1537.86	1126.85	1145.89	1121.03	1647.98	1563.99	1682.33	1801.14	1589.36	1505.4	1556.61	1609.65	2101.48	2143.84	2151.19	2172.26	0.575536	0.781377	0.730678
RAB11FIP1	Q6WKZ4	831.152	518.737	764.537	619.751	291.743	340.458	453.65	363.009	827.955	812.997	785.879	900.979	953.363	785.556	800.108	963.563	0.780616	0.413654	0.9501
STXBP4	Q6ZWJ1	467.488	64.5512	124.121	188.417	195.727	223.927	75.8532	284.981	126.801	152.701	347.462	176.021	221.739	247.906	279.207	279.364	0.821401	0.759071	0.780949
PIP4P1	Q86T03	1186.58	1021.51	1191.17	1108.08	918.886	531.117	1044.34	431.021	1105.84	933.892	1013.4	1074.6	1109.63	1274.61	726.135	855.88	1.13643	0.737563	1.04071
HEATR5A	Q86XA9	703.529	213.885	220.865	255.951	208.61	144.522	262.571	273.597	140.376	111.516	162.98	123.813	148.494	107.599	129.758	116.434	2.77577	1.7705	1.07247
STX12	Q86Y82	2073.75	1160.45	1933.59	1378.92	1663.14	1357.25	1319.77	1301.46	1190.3	1306.81	1329.27	1475.19	1866.62	1770.27	1813.38	1675.63	0.918721	0.791708	0.743986
PIK3C3	Q8NEB9	995.622	570.65	609.092	632.698	903.611	848.23	905.885	566.37	628.792	557.789	699.833	627.856	651.308	462.727	615.34	459.711	1.28276	1.4728	1.14855
APPL2	Q8NEU8	1246.73	918.539	1061.44	1075.1	407.789	621.001	611.809	365.356	416.27	439.807	376.755	454.466	823.212	1026.52	803.963	766.897	1.25762	0.586436	0.493277
RAPGEF6	Q8TEU7	226.02	224.539	280.714	304.866	303.836	265.204	293.346	198.747	446.108	347.37	350.734	414.826	442.753	398.514	352.672	389.061	0.654541	0.67033	0.984863
SCARB1	Q8WTV0	2435.69	2407.25	2745.82	2971.36	1342.1	1479.82	678.027	1923.69	4287.04	3886.04	3992.87	4713.82	1875.11	1813.57	1551.46	2430.89	1.37662	0.707028	2.20045
HSPH1	Q92598	3851.98	3279.61	3232.07	3082.11	3722.26	3947.3	4092.13	3790.87	1344.87	1258.07	1321.96	1329.44	4482.94	4365.86	4357.32	4242.85	0.770576	0.891316	0.301126
TBC1D5	Q92609	1924.83	1650.41	1807.05	1655.46	559.743	562.956	919.396	598.616	664.551	714.224	719.509	712.306	1266.99	1070.45	1258.16	912.31	1.5612	0.585794	0.623479
RAB8B	Q92930	428.495	291.21	239.997	289.63	155.256	159.049	180.321	241.103	129.703	134.249	123.315	145.855	141.37	122.002	119.846	148.852	2.34806	1.38277	1.00198
ATP6V0A1	Q93050	1762	1399.67	1409.84	1415.53	1915.97	1953.91	1736.61	1886.39	1800.01	1595.68	1682.68	1861.79	2027.09	1750.52	2010.85	1981.38	0.770548	0.964355	0.893217
RAB24	Q969Q5	441.532	379.665	473.65	291.443	335.895	383.74	167.636	318.762	293.297	197.785	208.262	183.686	310.532	254.69	483.844	468.727	1.04513	0.794597	0.581786
SH3KBP1	Q96B97	3051.3	2684.08	2999.98	2884.49	658.803	939.57	866.124	995.92	1726.03	1603.48	1790.49	1921.46	650.41	389.579	512.957	624.202	5.33719	1.58943	3.23426
AP2M1	Q96CW1	8547.5	7241.59	8684.67	7317.65	4994.64	5154.17	4653.81	4765.27	3540.88	3420.21	3159.56	3317.7	6183.57	6373.01	5876.39	6334.24	1.28361	0.790072	0.542587
PIK3R4	Q99570	477.033	322.93	485.317	399.591	401.959	510.16	515.553	438.287	480.163	473.248	459.553	509.689	468.838	428.545	411.067	548.548	0.90731	1.00483	1.03536
VAMP8	Q9BV40	960.478	752.733	862.384	749.319	951.839	985.53	1118.57	1139.01	1124.3	1003.35	981.893	1304.28	1038.73	697.453	1254.56	869.089	0.861414	1.08682	1.14353
RAB11FIP5	Q9BXF6	1082.96	932.82	1114.23	1031.47	248.809	159.822	391.036	219.258	408.724	387.753	353.74	404.372	363.96	381.285	341.997	454.153	2.69982	0.66104	1.00856
RAB34	Q9BZG1	888.078	1225.46	1141.04	1112.24	935.756	1081.64	834.133	892.147	421.647	123.945	112.565	365.009	433.746	463.976	366.952	75.9725	3.25725	2.79244	0.763189
ZDHHC5	Q9C0B5	685.006	503.25	559.979	548.159	372.079	591.733	240.957	308.713	421.183	484.784	426.049	458.952	313.711	296.004	345.319	337.43	1.77676	1.171	1.3857
MCOLN1	Q9GZU1	724.145	181.41	352.26	390.923	305.443	513.916	157.333	769.051	199.441	54.0121	175.243	302.007	91.512	105.393	169.338	66.7884	3.80742	4.03144	1.68741
UNC93B1	Q9H1C4	2143.01	1671.5	2030.39	1666.12	181.346	216.709	372.397	399.527	495.699	436.126	397.317	425.906	544.235	407.667	508.232	404.173	4.02885	0.627568	0.941394
ATG5	Q9H1Y0	504.231	534.515	786.54	625.307	330.211	342.89	820.915	340.401	711.25	694.737	592.929	630.352	567.657	497.858	495.85	590.494	1.13883	0.85248	1.22186
EHD4	Q9H223	1327.49	809.251	929.673	906.658	783.705	958.572	703.388	862.621	2490.84	2283.71	2525.18	2302.03	1421.74	1444.01	1583.51	1297.74	0.69133	0.575655	1.67074
VPS11	Q9H270	805.777	635.436	553.479	618.012	615.07	720.012	599.938	631.815	367.248	466.981	406.62	429.518	819.883	763.43	695.656	659.931	0.889007	0.8734	0.568365
CDC42EP4	Q9H3Q1	567.892	401.795	616.515	423.183	622.717	529.903	488.865	624.612	415.294	337.403	349.758	376.718	464.712	324.528	484.928	356.526	1.23223	1.38965	0.907082
EHD1	Q9H4M9	3278.39	2441.89	2506.52	2307.75	1829.34	1883.15	1521.59	1891.09	1996.98	1605.66	1735.82	1835.75	1721.91	1987.48	1648.16	1658.45	1.5015	1.01556	1.02255
ATP6V0A4	Q9HBG4	603.194	322.225	567.685	504.729	247.718	179.581	169.82	74.2493	148.058	377.192	67.1637	110.637	662.33	435.893	574.753	588.813	0.883298	0.296831	0.310838
RAB9B	Q9NP90	91.8967	1876.48	95.9316	923.949	741.314	504.193	1286.63	1515.5	2443.3	2014.27	3979.92	1895.44	5476.34	5142.11	5099.92	3039.83	0.159304	0.215779	0.550849
TLR9	Q9NR96	2238.81	2047.63	2043.24	2510.93	860.26	1019.93	937.782	826.655	44.2656	76.8078	78.9762	79.5626	326.27	349.675	382.514	321.079	6.40838	2.64192	0.202685
PICK1	Q9NRD5	181.664	144.825	250.716	181.324	78.4977	105.168	203.063	55.0686	82.1322	112.322	128.718	170.727	246.367	300.911	362.861	292.401	0.630773	0.367387	0.410713
LMBRD1	Q9NUN5	83.1896	8105.61	13887.2	3542.34	633.295	688.1	717.704	785.891	541.171	505.279	273.222	840.51	546.443	624.459	298.258	399.522	13.7093	1.51176	1.15599
EHD3	Q9NZN3	3267.03	2827.33	3155.33	3016.31	1616.68	1591.22	1455.36	1757.2	1944.94	1848.25	2012.7	2016.37	2163.01	2071.43	2011.56	1823.21	1.5201	0.795674	0.969395
EHD2	Q9NZN4	3652.95	3554.45	3239.13	3421.58	1697.16	2126.25	1567.98	1830.96	259.895	386.519	468.288	365.71	301.547	167.953	76.9004	189.423	18.8471	9.81533	2.01191
HEATR5B	Q9P2D3	608.651	418.374	426.616	397.059	180.064	161.918	179.631	110.865	271.297	214.19	273.228	256.339	376.164	392.344	371.08	354.274	1.23887	0.423385	0.679483
DMBT1	Q9UGM3	2285.29	2473.99	131.945	2225.57	4317.35	5123.08	3414.34	4289.99	2073.35	129.762	2700.65	3044.22	3770.72	3808.52	2068.26	3600.83	0.537184	1.29411	0.599923
RABGEF1	Q9UJ41	704.079	395.789	304.189	394.958	511.752	416.607	435.377	607.663	397.855	411.471	309.424	388.22	741.182	547.893	663.537	695.99	0.679232	0.744317	0.568968
APPL1	Q9UKG1	1603.28	1300.67	1612.97	1487.79	1561.54	1804.12	1722.56	1895.53	1447.04	1353.36	1287.37	1447.46	1531.57	1408.75	1319.26	1392.47	1.06239	1.23561	0.979332
RAB22A	Q9UL26	1071.01	814.197	611.392	737.297	830.322	875.659	863.62	1018.16	474.789	498.446	576.147	509.565	2450.11	2597.92	2314.63	2414.11	0.330773	0.366968	0.210596
RAB23	Q9ULC3	412.793	349.215	383.006	380.624	308.628	233.975	281.499	411.148	338.204	381.805	286.472	409.652	357.733	406.072	379.762	462.542	0.949897	0.769095	0.881717
MYO6	Q9UM54	1010.21	988.987	1084.68	1104.15	303.719	328.575	453.363	385.778	578.465	646.323	578.772	611.148	3120.25	2871.35	3142.06	2928.96	0.347191	0.121983	0.200181
STX8	Q9UNK0	546.856	375.697	391.074	393.452	110.157	260.15	141.964	256.894	190.28	130.453	239.668	239.348	359.594	212.373	339.156	277.345	1.43637	0.64719	0.672923
PIKFYVE	Q9Y2I7	120.741	250.104	148.514	392.623	244.525	201.096	67.8826	234.505	208.156	277.821	267.992	449.965	158.348	132.985	117.381	247.301	1.39018	1.14023	1.83522
ATP6V0A2	Q9Y487	201.724	460.308	394.752	294.067	558.805	717.826	542.484	643.89	594.406	436.35	484.026	675.546	632.955	622.077	555.544	652.221	0.548503	1.00008	0.889366
HYOU1	Q9Y4L1	4757.04	5189.11	5167.28	5231.71	4341.26	4237.61	3925.26	4588.35	9104.05	8402.77	8874.33	9207.49	9945.4	8989.39	7447.62	9224.03	0.571389	0.480039	0.9995
DYNC1LI1	Q9Y6G9	2823.83	3109.53	3489.13	3274.98	2251.69	2021.3	2595.43	2563.15	2819.47	2279.29	2546.66	2839.29	2995.75	2715.31	2665.87	2628.42	1.15375	0.856999	0.952692
